# Supplementary material for: ATP-Dependent Ligases and AEP Primases Affect the Profile and Frequency of Mutations in Mycobacteria under Oxidative Stress
Source: Genes (Basel). 2021 Apr 9;12(4):547. doi: 10.3390/genes12040547 (PMC8068969; doi:10.3390/genes12040547)
Supplement: Supplementary file 1 [file genes-12-00547-s001.zip]

Archive with 6 entries (6 files):
- Figure S1-Southern.tif
- Figure S2-plates.tif
- Figure S3-sucrose.TIF
- genes-1139527-SI.pdf
- Table S3-genomes accession numbers.ods
- Table S4 - sequencing.xlsx
