# Supplementary material for: ATP-Dependent Ligases and AEP Primases Affect the Profile and Frequency of Mutations in Mycobacteria under Oxidative Stress
Source: Genes (Basel). 2021 Apr 9;12(4):547. doi: 10.3390/genes12040547 (PMC8068969; doi:10.3390/genes12040547)
Supplement: Supplementary file 1 [file genes-12-00547-s001.zip › genes-1139527-SI.pdf]

## **ATP-dependent ligases and AEP primases affect the profile and frequency of mutations in mycobacteria under oxidative stress.**

Anna Brzostek, Filip Gąsior, Jakub Lach, Lidia Żukowska, Ewelina Lechowicz, Małgorzata Korycka-Machała, Dominik Strapagiel, Jarosław Dziadek

Supplementary Figures and Tables:

Tables:

1. Table S1 – Bacterial strains
2. Table S2 – Plasmids and primers
3. Table S3 –Description of strains sequenced by NGS (see separate data set, Excel)
4. Table S4 - Summary of NGS analysis (see separate data set, Excel)
5. Table S5 – Mutations detected in *M. smegmatis* cells growing in the presence of CHP

Figures:

1. Figure S1 – Southern blot analysis of the  $\Delta ku-ligD-ligC1-ligC2-prim$  mutant
2. Figure S2 – Phenotypic analysis of *M. smegmatis* strains in the presence of various DNA damaging assaults
3. Figure S3 – Southern blot analysis of sucrose-resistant mutants

**Table S1 – Bacterial strains**

| Name/genotype                        | STRAINS                                                                                                     | Reference                                          |
|--------------------------------------|-------------------------------------------------------------------------------------------------------------|----------------------------------------------------|
| Top10F'                              | <i>Escherichia coli</i> strain                                                                              | Invitrogen                                         |
| mc <sup>2</sup> 155                  | <i>M. smegmatis</i> - wild type                                                                             | Laboratory stock                                   |
| $\Delta ku$                          | <i>M. smegmatis</i> defective in the synthesis of Ku                                                        | Korycka-Machala et al., 2007; Pitcher et al., 2007 |
| $\Delta ligD$                        | <i>M. smegmatis</i> defective in the synthesis of LigD                                                      | Korycka-Machala et al., 2007; Pitcher et al., 2007 |
| $\Delta ku-ligD$                     | <i>M. smegmatis</i> defective in the synthesis of Ku and LigD                                               | Korycka-Machala et al., 2007; Pitcher et al., 2007 |
| $\Delta ligC_1-ligC_2-primC$         | <i>M. smegmatis</i> defective in the synthesis of LigC <sub>1</sub> , LigC <sub>2</sub> and PrimC           | Plocinski et al., 2017                             |
| $\Delta ku-ligD-ligC_1-ligC_2-primC$ | <i>M. smegmatis</i> defective in the synthesis of Ku, LigD, LigC <sub>1</sub> , LigC <sub>2</sub> and PrimC | This study                                         |

**Table S2 - Plasmids and primers**

| Plasmids used for this study       | CLONING VECTORS                                                                              |                                         |
|------------------------------------|----------------------------------------------------------------------------------------------|-----------------------------------------|
| pJET 1.2/blunt                     | Blunt cloning vector, Amp <sup>R</sup>                                                       | Thermo Scientific                       |
| p2NIL                              | Recombination vector, nonreplicating in mycobacteria, Kan <sup>R</sup>                       | Parish& Stoker, 2000                    |
| pGoal17                            | Source of PacI cassette and <i>sacB</i> , Amp <sup>R</sup>                                   | Parish& Stoker, 2000                    |
| pMV306K                            | Mycobacterial integrative vector, Kan <sup>R</sup>                                           | Med-Immune Inc                          |
| pMV306Km- <i>sacB</i>              | Integrative plasmid for selection of sucrose resistant ( <i>sacB</i> <sup>R</sup> ) colonies | This study                              |
| Primers used in this study         |                                                                                              |                                         |
| Name of primer                     | Sequence (5'>3')                                                                             | Application                             |
| Msmeg_ligC1,ligC2, Prim2 probe-F   | TCACTGCTTGCGGTTGCCCTGC                                                                       | Southern blotting - hybridization probe |
| Msmeg_ligC1,ligC2, Prim2 - probe-R | GGCGAGCGGTTGTTTCATCG                                                                         |                                         |
| <i>sacB</i> NotI-F                 | CGCGGCCGCTCGAGTGACCACAACGACGC                                                                | <i>sacB</i> cloning into pMV306Km       |
| <i>sacB</i> XbaI-R                 | CTCTAGATCGGCATTTTCTTTTGCGTTT                                                                 |                                         |

**Table S3 – Description of strains sequenced by NGS (see separate data set, Excel)****Table S4 – Summary of NGS analysis (see separate data set, Excel)****Table S5 - Mutations detected in *M. smegmatis* cells growing in the presence of CHP.**

| <i>M. smegmatis</i> strains |                              |     |        |
|-----------------------------|------------------------------|-----|--------|
|                             | wild-type                    | CCP | KuDCCP |
| substitution                | number of positions affected |     |        |
| C→T                         | 0                            | 0   | 1      |
| G→T                         | 37                           | 32  | 26     |
| G→C                         | 29                           | 27  | 34     |
| C→G                         | 48                           | 25  | 43     |
| A→C                         | 54                           | 45  | 56     |
| T→G                         | 67                           | 58  | 57     |
| A→T                         | 23                           | 10  | 16     |
| A→G                         | 5                            | 1   | 5      |
| C→A                         | 48                           | 28  | 35     |
| T→A                         | 24                           | 17  | 17     |
| T→C                         | 4                            | 2   | 0      |
| G→A                         | 0                            | 0   | 0      |
| total                       | 339                          | 245 | 290    |

The culture of wild-type *M. smegmatis* as well as mutants  $\Delta ku$ -*ligD*-*ligC1*-*ligC2*-*primC* (KuDCCP) and  $\Delta ligC1$ -*ligC2*-*primC* (CCP) growing in the presence of CHP were sequenced using NGS technology and analyzed concerning the presence of mutations. The most abundant changes are highlighted by gray background.

**Figure S1 - Southern blot analysis of the  $\Delta ku$ - $ligD$ - $ligC_1$ - $ligC_2$ - $prim$  mutant**

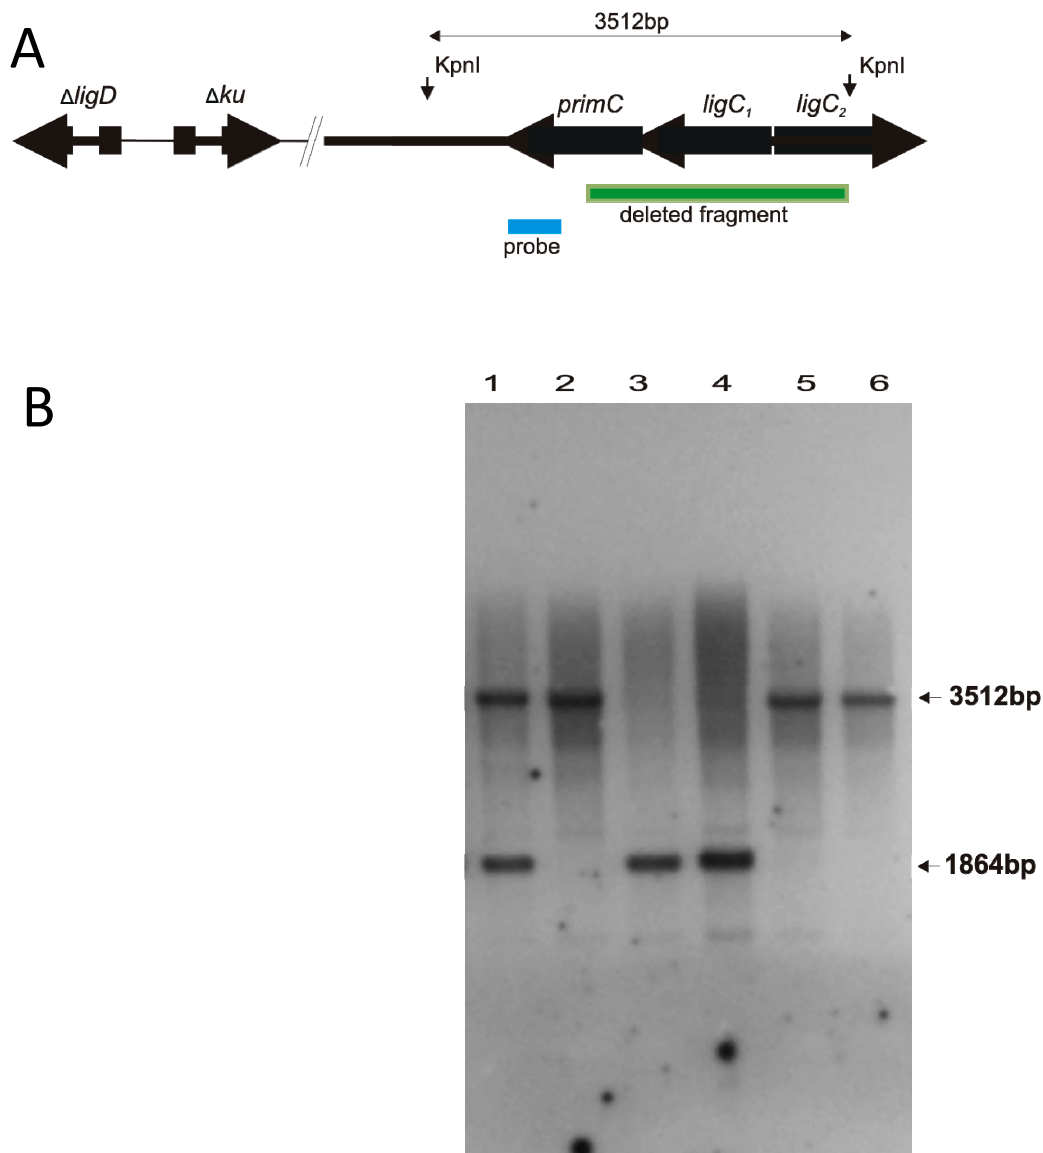

**Fig. S1.** Confirmation of mutant construction by Southern blotting analysis. **(A)** Genomic DNA fragment containing  $ligC_1$  (1056 bp),  $ligC_2$  (1065 bp) and  $primC$  (1116 bp) as well as mutated genes  $\Delta ku$  and  $\Delta ligD$  (genetic background of the strain for mutagenesis) are shown. KpnI restriction sites, internal deletion fragment and genetic probe are indicated. **(B)** Southern blot autoradiogram shows the presence of the intact genes ( $ligC_1$ - $ligC_2$ - $primC$ ) in the wild type strain (**lane 2**; 3512 bp), both intact and mutated genes in the single crossover mutant (**lane 1**; 3512 and 1864 bp), mutated genes in the double crossover mutants (**lanes 3-4**; 1864 bp), and wild-type genes in the double crossover strains reversed to the wild-type genotype (**lanes 5-6**; 3512 bp).

**Figure S2 – Phenotypic analysis of *M. smegmatis* strains in the presence of various DNA damaging assaults**

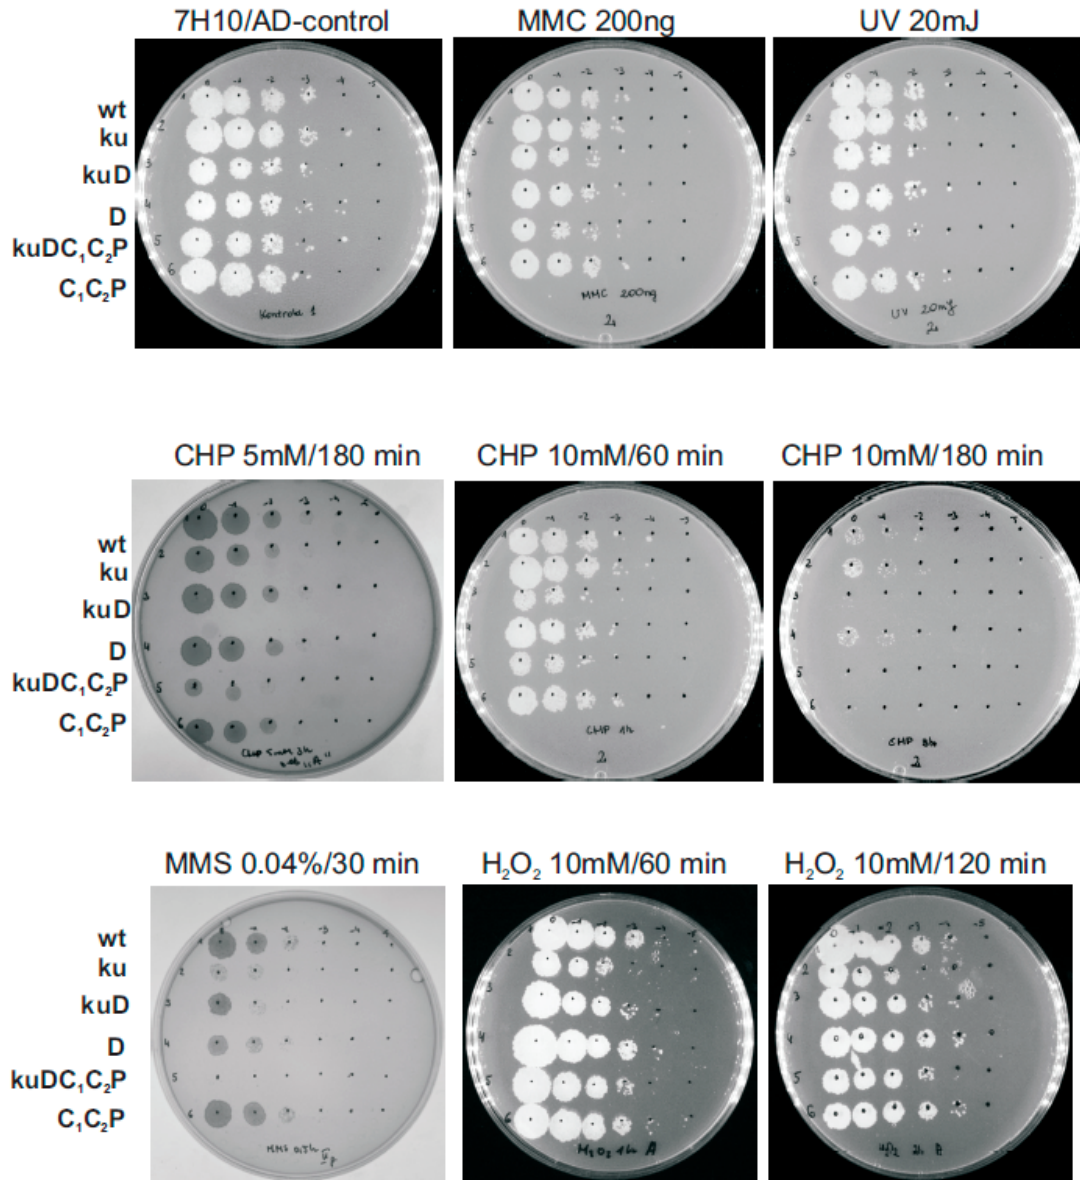

**Fig. S2.** The survival of *M. smegmatis* wild type (wt) and mutant cells:  $\Delta ku$  (ku);  $\Delta ku$ -*ligD* (kuD);  $\Delta ligD$  (D);  $\Delta ku$ -*ligD ligC1-ligC2-PolC* (kuDC<sub>1</sub> C<sub>2</sub>P) and  $\Delta ligC1-ligC2-PolC$  (C<sub>1</sub>C<sub>2</sub>P) in the absence of DNA damage (7H10/AD control) and after treatment with MMC, UV, CHP, MMS and H<sub>2</sub>O<sub>2</sub>. For qualitative analysis, the 5  $\mu$ l of indicated dilutions of cells ( $10^0$ - $10^{-5}$ ) were plated and after 3 days of incubation the plates were photographed using the gel documentation system.

**Figure S3 – Southern blot analysis of sucrose resistant mutants**

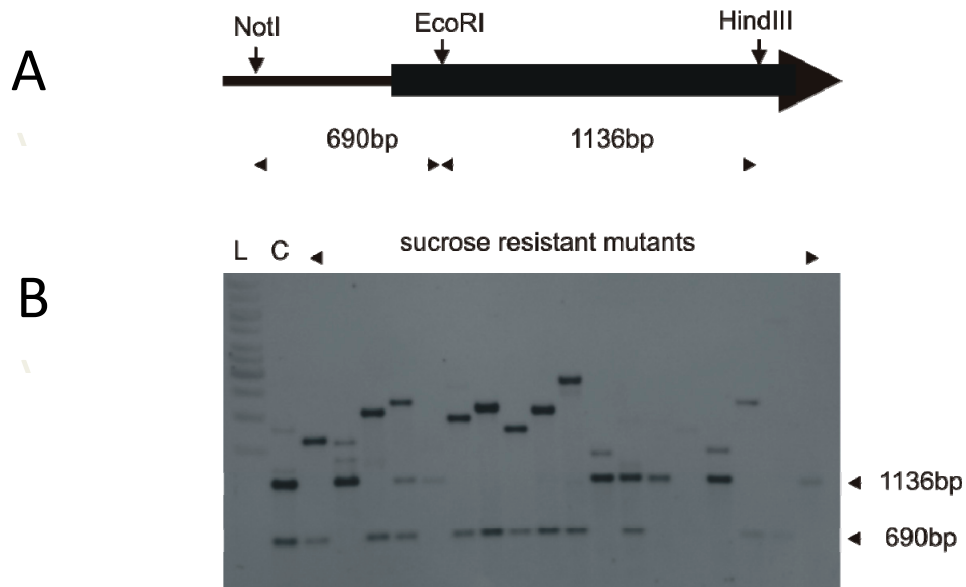

**Fig. S3.** The analysis of *sacB* gene by Southern blotting. **(A)** The black arrow represents *sacB* gene and its promoter introduced into the chromosomal DNA of *M. smegmatis* strain. The restriction sites and DNA fragments generated by digestion of chromosomal DNA by NotI/EcoRI/HindIII are indicated. **(B)** Southern blot autoradiogram shows the presence of the fragments of *sacB* gene and its promoter in the wild-type strain (C; 1136 and 690 bp) and selected sucrose-resistant mutants. L represents 1kb-DNA ladder.
