# Supplementary material for: ATP-Dependent Ligases and AEP Primases Affect the Profile and Frequency of Mutations in Mycobacteria under Oxidative Stress
Source: Genes (Basel). 2021 Apr 9;12(4):547. doi: 10.3390/genes12040547 (PMC8068969; doi:10.3390/genes12040547)
Supplement: Supplementary file 1 [file genes-12-00547-s001.zip › Table S3-genomes accession numbers.ods]

## Sheet: metadata-8548438-processed-ok
Column1	Column2	Column3	Column4	Column5	Column6	Column7	Column8	Column9	Column10	Column11	Column12	Column13	Column14	Column15	Column16	Column17	Column18	Column19	Column20	Column21	Column22	Column23
accession	study	object_status	bioproject_accession	biosample_accession	library_ID	title	library_strategy	library_source	library_selection	library_layout	platform	instrument_model	design_description	filetype	filename	filename2	filename3	filename4	filename5	filename6	filename7	filename8
SRR13052823	SRP291437	new	PRJNA675073	SAMN16707878	MC2-CHP-mix	WGS of Mycolicibacterium smegmatis mc2 155 mix	WGS	GENOMIC	unspecified	paired	ILLUMINA	NextSeq 500	The sequencing libraries were prepared, using the Vazyme TruePrep DNA Library Prep Kit V2 for Illumina preparation protocol (Vazyme Biotech Co.,Ltd, Nanjing, China). Whole-genome shotgun sequencing was performed on a NextSeq 500 platform, at a read length of 2 x 150 bp (300 cycles).	fastq	mc2-CHP-mix_S1_L001_R1_001.fastq.gz	mc2-CHP-mix_S1_L001_R2_001.fastq.gz	mc2-CHP-mix_S1_L002_R1_001.fastq.gz	mc2-CHP-mix_S1_L002_R2_001.fastq.gz	mc2-CHP-mix_S1_L003_R1_001.fastq.gz	mc2-CHP-mix_S1_L003_R2_001.fastq.gz	mc2-CHP-mix_S1_L004_R1_001.fastq.gz	mc2-CHP-mix_S1_L004_R2_001.fastq.gz
SRR13052822	SRP291437	new	PRJNA675073	SAMN16707879	KuLigDCCP-CHP-mix	WGS of Mycolicibacterium smegmatis mc2 155 knock-out mutant MSMEG_5580 (Ku), MSMEG_5570 (LigD), MSMEG_6302 (LigC1), MSMEG_6304 (LigC2) and MSMEG_6301 (Prm2) mix	WGS	GENOMIC	unspecified	paired	ILLUMINA	NextSeq 500	The sequencing libraries were prepared, using the Vazyme TruePrep DNA Library Prep Kit V2 for Illumina preparation protocol (Vazyme Biotech Co.,Ltd, Nanjing, China). Whole-genome shotgun sequencing was performed on a NextSeq 500 platform, at a read length of 2 x 150 bp (300 cycles).	fastq	LigDKuCCP-CHP-mix_S2_L001_R1_001.fastq.gz	LigDKuCCP-CHP-mix_S2_L001_R2_001.fastq.gz	LigDKuCCP-CHP-mix_S2_L002_R1_001.fastq.gz	LigDKuCCP-CHP-mix_S2_L002_R2_001.fastq.gz	LigDKuCCP-CHP-mix_S2_L003_R1_001.fastq.gz	LigDKuCCP-CHP-mix_S2_L003_R2_001.fastq.gz	LigDKuCCP-CHP-mix_S2_L004_R1_001.fastq.gz	LigDKuCCP-CHP-mix_S2_L004_R2_001.fastq.gz
SRR13052821	SRP291437	new	PRJNA675073	SAMN16707880	CCP-CHP-mix	WGS of Mycolicibacterium smegmatis mc2 155 knock-out mutant MSMEG_6302 (LigC1), MSMEG_6304 (LigC2) and MSMEG_6301(Prim2) mix	WGS	GENOMIC	unspecified	paired	ILLUMINA	NextSeq 500	The sequencing libraries were prepared, using the Vazyme TruePrep DNA Library Prep Kit V2 for Illumina preparation protocol (Vazyme Biotech Co.,Ltd, Nanjing, China). Whole-genome shotgun sequencing was performed on a NextSeq 500 platform, at a read length of 2 x 150 bp (300 cycles).	fastq	CCP-CHP-mix_S3_L001_R1_001.fastq.gz	CCP-CHP-mix_S3_L001_R2_001.fastq.gz	CCP-CHP-mix_S3_L002_R1_001.fastq.gz	CCP-CHP-mix_S3_L002_R2_001.fastq.gz	CCP-CHP-mix_S3_L003_R1_001.fastq.gz	CCP-CHP-mix_S3_L003_R2_001.fastq.gz	CCP-CHP-mix_S3_L004_R1_001.fastq.gz	CCP-CHP-mix_S3_L004_R2_001.fastq.gz
SRR12999404	SRP291437	new	PRJNA675073	SAMN16686940	mc2-kontr	WGS of Mycolicibacterium smegmatis MC2 155	WGS	GENOMIC	unspecified	paired	ILLUMINA	NextSeq 500	The sequencing libraries were prepared, using the Vazyme TruePrep DNA Library Prep Kit V2 for Illumina preparation protocol (Vazyme Biotech Co.,Ltd, Nanjing, China). Whole-genome shotgun sequencing was performed on a NextSeq 500 platform, at a read length of 2 150 bp (300 cycles).	fastq	mc2-kontr-smegmatis_S30_L001_R1_001.fastq	mc2-kontr-smegmatis_S30_L001_R2_001.fastq	mc2-kontr-smegmatis_S30_L002_R1_001.fastq	mc2-kontr-smegmatis_S30_L002_R2_001.fastq	mc2-kontr-smegmatis_S30_L003_R1_001.fastq	mc2-kontr-smegmatis_S30_L003_R2_001.fastq	mc2-kontr-smegmatis_S30_L004_R1_001.fastq	mc2-kontr-smegmatis_S30_L004_R2_001.fastq
SRR13052617	SRP291437	new	PRJNA675073	SAMN16686974	Ku-kontr	WGS of Mycolicibacterium smegmatis MC2 155: knock-out mutant MSMEG_5580 (Ku protein)	WGS	GENOMIC	unspecified	paired	ILLUMINA	NextSeq 500	The sequencing libraries were prepared, using the Vazyme TruePrep DNA Library Prep Kit V2 for Illumina preparation protocol (Vazyme Biotech Co.,Ltd, Nanjing, China). Whole-genome shotgun sequencing was performed on a NextSeq 500 platform, at a read length of 2 x 150 bp (300 cycles).	fastq	KU-kontr-smegmatis_S31_L001_R1_001.fastq.gz	KU-kontr-smegmatis_S31_L001_R2_001.fastq.gz	KU-kontr-smegmatis_S31_L002_R1_001.fastq.gz	KU-kontr-smegmatis_S31_L002_R2_001.fastq.gz	KU-kontr-smegmatis_S31_L003_R1_001.fastq.gz	KU-kontr-smegmatis_S31_L003_R2_001.fastq.gz	KU-kontr-smegmatis_S31_L004_R1_001.fastq.gz	KU-kontr-smegmatis_S31_L004_R2_001.fastq.gz
SRR13052616	SRP291437	new	PRJNA675073	SAMN16707729	KuLigD-kontr	WGS of Mycolicibacterium smegmatis MC2 155: knock-out mutant MSMEG_5570 (LigD protein), MSMEG_5580 (Ku protein)	WGS	GENOMIC	unspecified	paired	ILLUMINA	NextSeq 500	The sequencing libraries were prepared, using the Vazyme TruePrep DNA Library Prep Kit V2 for Illumina preparation protocol (Vazyme Biotech Co.,Ltd, Nanjing, China). Whole-genome shotgun sequencing was performed on a NextSeq 500 platform, at a read length of 2 x 150 bp (300 cycles).	fastq	KULigD-kontr-smegmatis_S33_L001_R1_001.fastq.gz	KULigD-kontr-smegmatis_S33_L001_R2_001.fastq.gz	KULigD-kontr-smegmatis_S33_L002_R1_001.fastq.gz	KULigD-kontr-smegmatis_S33_L002_R2_001.fastq.gz	KULigD-kontr-smegmatis_S33_L003_R1_001.fastq.gz	KULigD-kontr-smegmatis_S33_L003_R2_001.fastq.gz	KULigD-kontr-smegmatis_S33_L004_R1_001.fastq.gz	KULigD-kontr-smegmatis_S33_L004_R2_001.fastq.gz
SRR13052615	SRP291437	new	PRJNA675073	SAMN16707730	CCP-kontr	WGS of Mycolicibacterium smegmatis MC2 155: knock-out mutant MSMEG_6302 (LigC1), MSMEG_6304 (LigC2) and MSMEG_6301(Prim2)	WGS	GENOMIC	unspecified	paired	ILLUMINA	NextSeq 500	The sequencing libraries were prepared, using the Vazyme TruePrep DNA Library Prep Kit V2 for Illumina preparation protocol (Vazyme Biotech Co.,Ltd, Nanjing, China). Whole-genome shotgun sequencing was performed on a NextSeq 500 platform, at a read length of 2 x 150 bp (300 cycles).	fastq	CCP-kontr-smegmatis_S35_L001_R1_001.fastq.gz	CCP-kontr-smegmatis_S35_L001_R2_001.fastq.gz	CCP-kontr-smegmatis_S35_L002_R1_001.fastq.gz	CCP-kontr-smegmatis_S35_L002_R2_001.fastq.gz	CCP-kontr-smegmatis_S35_L003_R1_001.fastq.gz	CCP-kontr-smegmatis_S35_L003_R2_001.fastq.gz	CCP-kontr-smegmatis_S35_L004_R1_001.fastq.gz	CCP-kontr-smegmatis_S35_L004_R2_001.fastq.gz
SRR13052614	SRP291437	new	PRJNA675073	SAMN16707731	KuLigDCCP-kontr	WGS of Mycolicibacterium smegmatis MC2 155: knock-out mutant MSMEG_5580 (Ku), MSMEG_5570 (LigD), MSMEG_6302 (LigC1), MSMEG_6304 (LigC2) and MSMEG_6301 (Prm2)	WGS	GENOMIC	unspecified	paired	ILLUMINA	NextSeq 500	The sequencing libraries were prepared, using the Vazyme TruePrep DNA Library Prep Kit V2 for Illumina preparation protocol (Vazyme Biotech Co.,Ltd, Nanjing, China). Whole-genome shotgun sequencing was performed on a NextSeq 500 platform, at a read length of 2 x 150 bp (300 cycles).	fastq	KULigDCCP-kontr-smegmatis_S34_L001_R1_001.fastq.gz	KULigDCCP-kontr-smegmatis_S34_L001_R2_001.fastq.gz	KULigDCCP-kontr-smegmatis_S34_L002_R1_001.fastq.gz	KULigDCCP-kontr-smegmatis_S34_L002_R2_001.fastq.gz	KULigDCCP-kontr-smegmatis_S34_L003_R1_001.fastq.gz	KULigDCCP-kontr-smegmatis_S34_L003_R2_001.fastq.gz	KULigDCCP-kontr-smegmatis_S34_L004_R1_001.fastq.gz	KULigDCCP-kontr-smegmatis_S34_L004_R2_001.fastq.gz
SRR13052613	SRP291437	new	PRJNA675073	SAMN16707728	LigD-kontr	WGS of Mycolicibacterium smegmatis MC2 155: knock-out mutant MSMEG_5570 (LigD protein)	WGS	GENOMIC	unspecified	paired	ILLUMINA	NextSeq 500	The sequencing libraries were prepared, using the Vazyme TruePrep DNA Library Prep Kit V2 for Illumina preparation protocol (Vazyme Biotech Co.,Ltd, Nanjing, China). Whole-genome shotgun sequencing was performed on a NextSeq 500 platform, at a read length of 2 x 150 bp (300 cycles).	fastq	LigD-kontr-smegmatis_S32_L001_R1_001.fastq.gz	LigD-kontr-smegmatis_S32_L001_R2_001.fastq.gz	LigD-kontr-smegmatis_S32_L002_R1_001.fastq.gz	LigD-kontr-smegmatis_S32_L002_R2_001.fastq.gz	LigD-kontr-smegmatis_S32_L003_R1_001.fastq.gz	LigD-kontr-smegmatis_S32_L003_R2_001.fastq.gz	LigD-kontr-smegmatis_S32_L004_R1_001.fastq.gz	LigD-kontr-smegmatis_S32_L004_R2_001.fastq.gz
SRR13052794	SRP291437	new	PRJNA675073	SAMN16707832	mc2-CHP-1	WGS of Mycolicibacterium smegmatis MC2 155 A	WGS	GENOMIC	unspecified	paired	ILLUMINA	NextSeq 500	The sequencing libraries were prepared, using the Vazyme TruePrep DNA Library Prep Kit V2 for Illumina preparation protocol (Vazyme Biotech Co.,Ltd, Nanjing, China). Whole-genome shotgun sequencing was performed on a NextSeq 500 platform, at a read length of 2 x 150 bp (300 cycles).	fastq	mc2-CHP-1_S4_L001_R1_001.fastq.gz	mc2-CHP-1_S4_L001_R2_001.fastq.gz	mc2-CHP-1_S4_L002_R1_001.fastq.gz	mc2-CHP-1_S4_L002_R2_001.fastq.gz	mc2-CHP-1_S4_L003_R1_001.fastq.gz	mc2-CHP-1_S4_L003_R2_001.fastq.gz	mc2-CHP-1_S4_L004_R1_001.fastq.gz	mc2-CHP-1_S4_L004_R2_001.fastq.gz
SRR13052793	SRP291437	new	PRJNA675073	SAMN16707833	mc2-CHP-2	WGS of Mycolicibacterium smegmatis MC2 155 B	WGS	GENOMIC	unspecified	paired	ILLUMINA	NextSeq 500	The sequencing libraries were prepared, using the Vazyme TruePrep DNA Library Prep Kit V2 for Illumina preparation protocol (Vazyme Biotech Co.,Ltd, Nanjing, China). Whole-genome shotgun sequencing was performed on a NextSeq 500 platform, at a read length of 2 x 150 bp (300 cycles).	fastq	mc2-CHP-2_S5_L001_R1_001.fastq.gz	mc2-CHP-2_S5_L001_R2_001.fastq.gz	mc2-CHP-2_S5_L002_R1_001.fastq.gz	mc2-CHP-2_S5_L002_R2_001.fastq.gz	mc2-CHP-2_S5_L003_R1_001.fastq.gz	mc2-CHP-2_S5_L003_R2_001.fastq.gz	mc2-CHP-2_S5_L004_R1_001.fastq.gz	mc2-CHP-2_S5_L004_R2_001.fastq.gz
SRR13052798	SRP291437	new	PRJNA675073	SAMN16707834	mc2-CHP-3	WGS of Mycolicibacterium smegmatis MC2 155 C	WGS	GENOMIC	unspecified	paired	ILLUMINA	NextSeq 500	The sequencing libraries were prepared, using the Vazyme TruePrep DNA Library Prep Kit V2 for Illumina preparation protocol (Vazyme Biotech Co.,Ltd, Nanjing, China). Whole-genome shotgun sequencing was performed on a NextSeq 500 platform, at a read length of 2 x 150 bp (300 cycles).	fastq	mc2-CHP-3_S6_L001_R1_001.fastq.gz	mc2-CHP-3_S6_L001_R2_001.fastq.gz	mc2-CHP-3_S6_L002_R1_001.fastq.gz	mc2-CHP-3_S6_L002_R2_001.fastq.gz	mc2-CHP-3_S6_L003_R1_001.fastq.gz	mc2-CHP-3_S6_L003_R2_001.fastq.gz	mc2-CHP-3_S6_L004_R1_001.fastq.gz	mc2-CHP-3_S6_L004_R2_001.fastq.gz
SRR13052797	SRP291437	new	PRJNA675073	SAMN16707835	mc2-CHP-4	WGS of Mycolicibacterium smegmatis MC2 155 D	WGS	GENOMIC	unspecified	paired	ILLUMINA	NextSeq 500	The sequencing libraries were prepared, using the Vazyme TruePrep DNA Library Prep Kit V2 for Illumina preparation protocol (Vazyme Biotech Co.,Ltd, Nanjing, China). Whole-genome shotgun sequencing was performed on a NextSeq 500 platform, at a read length of 2 x 150 bp (300 cycles).	fastq	mc2-CHP-4_S7_L001_R1_001.fastq.gz	mc2-CHP-4_S7_L001_R2_001.fastq.gz	mc2-CHP-4_S7_L002_R1_001.fastq.gz	mc2-CHP-4_S7_L002_R2_001.fastq.gz	mc2-CHP-4_S7_L003_R1_001.fastq.gz	mc2-CHP-4_S7_L003_R2_001.fastq.gz	mc2-CHP-4_S7_L004_R1_001.fastq.gz	mc2-CHP-4_S7_L004_R2_001.fastq.gz
SRR13052796	SRP291437	new	PRJNA675073	SAMN16707836	mc2-CHP-5	WGS of Mycolicibacterium smegmatis MC2 155 E	WGS	GENOMIC	unspecified	paired	ILLUMINA	NextSeq 500	The sequencing libraries were prepared, using the Vazyme TruePrep DNA Library Prep Kit V2 for Illumina preparation protocol (Vazyme Biotech Co.,Ltd, Nanjing, China). Whole-genome shotgun sequencing was performed on a NextSeq 500 platform, at a read length of 2 x 150 bp (300 cycles).	fastq	mc2-CHP-5_S8_L001_R1_001.fastq.gz	mc2-CHP-5_S8_L001_R2_001.fastq.gz	mc2-CHP-5_S8_L002_R1_001.fastq.gz	mc2-CHP-5_S8_L002_R2_001.fastq.gz	mc2-CHP-5_S8_L003_R1_001.fastq.gz	mc2-CHP-5_S8_L003_R2_001.fastq.gz	mc2-CHP-5_S8_L004_R1_001.fastq.gz	mc2-CHP-5_S8_L004_R2_001.fastq.gz
SRR13052795	SRP291437	new	PRJNA675073	SAMN16707837	mc2-CHP-6	WGS of Mycolicibacterium smegmatis MC2 155 F	WGS	GENOMIC	unspecified	paired	ILLUMINA	NextSeq 500	The sequencing libraries were prepared, using the Vazyme TruePrep DNA Library Prep Kit V2 for Illumina preparation protocol (Vazyme Biotech Co.,Ltd, Nanjing, China). Whole-genome shotgun sequencing was performed on a NextSeq 500 platform, at a read length of 2 x 150 bp (300 cycles).	fastq	mc2-CHP-6_S9_L001_R1_001.fastq.gz	mc2-CHP-6_S9_L001_R2_001.fastq.gz	mc2-CHP-6_S9_L002_R1_001.fastq.gz	mc2-CHP-6_S9_L002_R2_001.fastq.gz	mc2-CHP-6_S9_L003_R1_001.fastq.gz	mc2-CHP-6_S9_L003_R2_001.fastq.gz	mc2-CHP-6_S9_L004_R1_001.fastq.gz	mc2-CHP-6_S9_L004_R2_001.fastq.gz
SRR13052808	SRP291437	new	PRJNA675073	SAMN16707857	KuLigDCCP-CHP-1	WGS of Mycolicibacterium smegmatis MC2 155: knock-out mutant MSMEG_5580 (Ku), MSMEG_5570 (LigD), MSMEG_6302 (LigC1), MSMEG_6304 (LigC2) and MSMEG_6301 (Prm2) A	WGS	GENOMIC	unspecified	paired	ILLUMINA	NextSeq 500	The sequencing libraries were prepared, using the Vazyme TruePrep DNA Library Prep Kit V2 for Illumina preparation protocol (Vazyme Biotech Co.,Ltd, Nanjing, China). Whole-genome shotgun sequencing was performed on a NextSeq 500 platform, at a read length of 2 x 150 bp (300 cycles).	fastq	LigDKuCCP-CHP-1_S10_L001_R1_001.fastq.gz	LigDKuCCP-CHP-1_S10_L001_R2_001.fastq.gz	LigDKuCCP-CHP-1_S10_L002_R1_001.fastq.gz	LigDKuCCP-CHP-1_S10_L002_R2_001.fastq.gz	LigDKuCCP-CHP-1_S10_L003_R1_001.fastq.gz	LigDKuCCP-CHP-1_S10_L003_R2_001.fastq.gz	LigDKuCCP-CHP-1_S10_L004_R1_001.fastq.gz	LigDKuCCP-CHP-1_S10_L004_R2_001.fastq.gz
SRR13052807	SRP291437	new	PRJNA675073	SAMN16707858	KuLigDCCP-CHP-2	WGS of Mycolicibacterium smegmatis MC2 155: knock-out mutant MSMEG_5580 (Ku), MSMEG_5570 (LigD), MSMEG_6302 (LigC1), MSMEG_6304 (LigC2) and MSMEG_6301 (Prm2) B	WGS	GENOMIC	unspecified	paired	ILLUMINA	NextSeq 500	The sequencing libraries were prepared, using the Vazyme TruePrep DNA Library Prep Kit V2 for Illumina preparation protocol (Vazyme Biotech Co.,Ltd, Nanjing, China). Whole-genome shotgun sequencing was performed on a NextSeq 500 platform, at a read length of 2 x 150 bp (300 cycles).	fastq	LigDKuCCP-CHP-2_S11_L001_R1_001.fastq.gz	LigDKuCCP-CHP-2_S11_L001_R2_001.fastq.gz	LigDKuCCP-CHP-2_S11_L002_R1_001.fastq.gz	LigDKuCCP-CHP-2_S11_L002_R2_001.fastq.gz	LigDKuCCP-CHP-2_S11_L003_R1_001.fastq.gz	LigDKuCCP-CHP-2_S11_L003_R2_001.fastq.gz	LigDKuCCP-CHP-2_S11_L004_R1_001.fastq.gz	LigDKuCCP-CHP-2_S11_L004_R2_001.fastq.gz
SRR13052806	SRP291437	new	PRJNA675073	SAMN16707859	KuLigDCCP-CHP-3	WGS of Mycolicibacterium smegmatis MC2 155: knock-out mutant MSMEG_5580 (Ku), MSMEG_5570 (LigD), MSMEG_6302 (LigC1), MSMEG_6304 (LigC2) and MSMEG_6301 (Prm2) C	WGS	GENOMIC	unspecified	paired	ILLUMINA	NextSeq 500	The sequencing libraries were prepared, using the Vazyme TruePrep DNA Library Prep Kit V2 for Illumina preparation protocol (Vazyme Biotech Co.,Ltd, Nanjing, China). Whole-genome shotgun sequencing was performed on a NextSeq 500 platform, at a read length of 2 x 150 bp (300 cycles).	fastq	LigDKuCCP-CHP-3_S12_L001_R1_001.fastq.gz	LigDKuCCP-CHP-3_S12_L001_R2_001.fastq.gz	LigDKuCCP-CHP-3_S12_L002_R1_001.fastq.gz	LigDKuCCP-CHP-3_S12_L002_R2_001.fastq.gz	LigDKuCCP-CHP-3_S12_L003_R1_001.fastq.gz	LigDKuCCP-CHP-3_S12_L003_R2_001.fastq.gz	LigDKuCCP-CHP-3_S12_L004_R1_001.fastq.gz	LigDKuCCP-CHP-3_S12_L004_R2_001.fastq.gz
SRR13052805	SRP291437	new	PRJNA675073	SAMN16707860	KuLigDCCP-CHP-4	WGS of Mycolicibacterium smegmatis MC2 155: knock-out mutant MSMEG_5580 (Ku), MSMEG_5570 (LigD), MSMEG_6302 (LigC1), MSMEG_6304 (LigC2) and MSMEG_6301 (Prm2) D	WGS	GENOMIC	unspecified	paired	ILLUMINA	NextSeq 500	The sequencing libraries were prepared, using the Vazyme TruePrep DNA Library Prep Kit V2 for Illumina preparation protocol (Vazyme Biotech Co.,Ltd, Nanjing, China). Whole-genome shotgun sequencing was performed on a NextSeq 500 platform, at a read length of 2 x 150 bp (300 cycles).	fastq	LigDKuCCP-CHP-4_S13_L001_R1_001.fastq.gz	LigDKuCCP-CHP-4_S13_L001_R2_001.fastq.gz	LigDKuCCP-CHP-4_S13_L002_R1_001.fastq.gz	LigDKuCCP-CHP-4_S13_L002_R2_001.fastq.gz	LigDKuCCP-CHP-4_S13_L003_R1_001.fastq.gz	LigDKuCCP-CHP-4_S13_L003_R2_001.fastq.gz	LigDKuCCP-CHP-4_S13_L004_R1_001.fastq.gz	LigDKuCCP-CHP-4_S13_L004_R2_001.fastq.gz
SRR13052804	SRP291437	new	PRJNA675073	SAMN16707861	KuLigDCCP-CHP-5	WGS of Mycolicibacterium smegmatis MC2 155: knock-out mutant MSMEG_5580 (Ku), MSMEG_5570 (LigD), MSMEG_6302 (LigC1), MSMEG_6304 (LigC2) and MSMEG_6301 (Prm2) E	WGS	GENOMIC	unspecified	paired	ILLUMINA	NextSeq 500	The sequencing libraries were prepared, using the Vazyme TruePrep DNA Library Prep Kit V2 for Illumina preparation protocol (Vazyme Biotech Co.,Ltd, Nanjing, China). Whole-genome shotgun sequencing was performed on a NextSeq 500 platform, at a read length of 2 x 150 bp (300 cycles).	fastq	LigDKuCCP-CHP-5_S14_L001_R1_001.fastq.gz	LigDKuCCP-CHP-5_S14_L001_R2_001.fastq.gz	LigDKuCCP-CHP-5_S14_L002_R1_001.fastq.gz	LigDKuCCP-CHP-5_S14_L002_R2_001.fastq.gz	LigDKuCCP-CHP-5_S14_L003_R1_001.fastq.gz	LigDKuCCP-CHP-5_S14_L003_R2_001.fastq.gz	LigDKuCCP-CHP-5_S14_L004_R1_001.fastq.gz	LigDKuCCP-CHP-5_S14_L004_R2_001.fastq.gz
SRR13052803	SRP291437	new	PRJNA675073	SAMN16707862	KuLigDCCP-CHP-6	WGS of Mycolicibacterium smegmatis MC2 155: knock-out mutant MSMEG_5580 (Ku), MSMEG_5570 (LigD), MSMEG_6302 (LigC1), MSMEG_6304 (LigC2) and MSMEG_6301 (Prm2) F	WGS	GENOMIC	unspecified	paired	ILLUMINA	NextSeq 500	The sequencing libraries were prepared, using the Vazyme TruePrep DNA Library Prep Kit V2 for Illumina preparation protocol (Vazyme Biotech Co.,Ltd, Nanjing, China). Whole-genome shotgun sequencing was performed on a NextSeq 500 platform, at a read length of 2 x 150 bp (300 cycles).	fastq	LigDKuCCP-CHP-6_S15_L001_R1_001.fastq.gz	LigDKuCCP-CHP-6_S15_L001_R2_001.fastq.gz	LigDKuCCP-CHP-6_S15_L002_R1_001.fastq.gz	LigDKuCCP-CHP-6_S15_L002_R2_001.fastq.gz	LigDKuCCP-CHP-6_S15_L003_R1_001.fastq.gz	LigDKuCCP-CHP-6_S15_L003_R2_001.fastq.gz	LigDKuCCP-CHP-6_S15_L004_R1_001.fastq.gz	LigDKuCCP-CHP-6_S15_L004_R2_001.fastq.gz
SRR13052802	SRP291437	new	PRJNA675073	SAMN16707863	KuLigDCCP-CHP-7	WGS of Mycolicibacterium smegmatis MC2 155: knock-out mutant MSMEG_5580 (Ku), MSMEG_5570 (LigD), MSMEG_6302 (LigC1), MSMEG_6304 (LigC2) and MSMEG_6301 (Prm2) G	WGS	GENOMIC	unspecified	paired	ILLUMINA	NextSeq 500	The sequencing libraries were prepared, using the Vazyme TruePrep DNA Library Prep Kit V2 for Illumina preparation protocol (Vazyme Biotech Co.,Ltd, Nanjing, China). Whole-genome shotgun sequencing was performed on a NextSeq 500 platform, at a read length of 2 x 150 bp (300 cycles).	fastq	LigDKuCCP-CHP-7_S16_L001_R1_001.fastq.gz	LigDKuCCP-CHP-7_S16_L001_R2_001.fastq.gz	LigDKuCCP-CHP-7_S16_L002_R1_001.fastq.gz	LigDKuCCP-CHP-7_S16_L002_R2_001.fastq.gz	LigDKuCCP-CHP-7_S16_L003_R1_001.fastq.gz	LigDKuCCP-CHP-7_S16_L003_R2_001.fastq.gz	LigDKuCCP-CHP-7_S16_L004_R1_001.fastq.gz	LigDKuCCP-CHP-7_S16_L004_R2_001.fastq.gz
SRR13052801	SRP291437	new	PRJNA675073	SAMN16707864	KuLigDCCP-CHP-8	WGS of Mycolicibacterium smegmatis MC2 155: knock-out mutant MSMEG_5580 (Ku), MSMEG_5570 (LigD), MSMEG_6302 (LigC1), MSMEG_6304 (LigC2) and MSMEG_6301 (Prm2) H	WGS	GENOMIC	unspecified	paired	ILLUMINA	NextSeq 500	The sequencing libraries were prepared, using the Vazyme TruePrep DNA Library Prep Kit V2 for Illumina preparation protocol (Vazyme Biotech Co.,Ltd, Nanjing, China). Whole-genome shotgun sequencing was performed on a NextSeq 500 platform, at a read length of 2 x 150 bp (300 cycles).	fastq	LigDKuCCP-CHP-8_S17_L001_R1_001.fastq.gz	LigDKuCCP-CHP-8_S17_L001_R2_001.fastq.gz	LigDKuCCP-CHP-8_S17_L002_R1_001.fastq.gz	LigDKuCCP-CHP-8_S17_L002_R2_001.fastq.gz	LigDKuCCP-CHP-8_S17_L003_R1_001.fastq.gz	LigDKuCCP-CHP-8_S17_L003_R2_001.fastq.gz	LigDKuCCP-CHP-8_S17_L004_R1_001.fastq.gz	LigDKuCCP-CHP-8_S17_L004_R2_001.fastq.gz
SRR13052800	SRP291437	new	PRJNA675073	SAMN16707865	KuLigDCCP-CHP-11	WGS of Mycolicibacterium smegmatis MC2 155: knock-out mutant MSMEG_5580 (Ku), MSMEG_5570 (LigD), MSMEG_6302 (LigC1), MSMEG_6304 (LigC2) and MSMEG_6301 (Prm2) I	WGS	GENOMIC	unspecified	paired	ILLUMINA	NextSeq 500	The sequencing libraries were prepared, using the Vazyme TruePrep DNA Library Prep Kit V2 for Illumina preparation protocol (Vazyme Biotech Co.,Ltd, Nanjing, China). Whole-genome shotgun sequencing was performed on a NextSeq 500 platform, at a read length of 2 x 150 bp (300 cycles).	fastq	LigDKuCCP-CHP-11_S18_L001_R1_001.fastq.gz	LigDKuCCP-CHP-11_S18_L001_R2_001.fastq.gz	LigDKuCCP-CHP-11_S18_L002_R1_001.fastq.gz	LigDKuCCP-CHP-11_S18_L002_R2_001.fastq.gz	LigDKuCCP-CHP-11_S18_L003_R1_001.fastq.gz	LigDKuCCP-CHP-11_S18_L003_R2_001.fastq.gz	LigDKuCCP-CHP-11_S18_L004_R1_001.fastq.gz	LigDKuCCP-CHP-11_S18_L004_R2_001.fastq.gz
SRR13052799	SRP291437	new	PRJNA675073	SAMN16707866	KuLigDCCP-CHP-12	WGS of Mycolicibacterium smegmatis MC2 155: knock-out mutant MSMEG_5580 (Ku), MSMEG_5570 (LigD), MSMEG_6302 (LigC1), MSMEG_6304 (LigC2) and MSMEG_6301 (Prm2) J	WGS	GENOMIC	unspecified	paired	ILLUMINA	NextSeq 500	The sequencing libraries were prepared, using the Vazyme TruePrep DNA Library Prep Kit V2 for Illumina preparation protocol (Vazyme Biotech Co.,Ltd, Nanjing, China). Whole-genome shotgun sequencing was performed on a NextSeq 500 platform, at a read length of 2 x 150 bp (300 cycles).	fastq	LigDKuCCP-CHP-12_S19_L001_R1_001.fastq.gz	LigDKuCCP-CHP-12_S19_L001_R2_001.fastq.gz	LigDKuCCP-CHP-12_S19_L002_R1_001.fastq.gz	LigDKuCCP-CHP-12_S19_L002_R2_001.fastq.gz	LigDKuCCP-CHP-12_S19_L003_R1_001.fastq.gz	LigDKuCCP-CHP-12_S19_L003_R2_001.fastq.gz	LigDKuCCP-CHP-12_S19_L004_R1_001.fastq.gz	LigDKuCCP-CHP-12_S19_L004_R2_001.fastq.gz
SRR13052833	SRP291437	new	PRJNA675073	SAMN16707867	CCP-CHP-1	WGS of Mycolicibacterium smegmatis mc2 155 knock-out mutant MSMEG_6302 (LigC1), MSMEG_6304 (LigC2) and MSMEG_6301(Prim2) A	WGS	GENOMIC	unspecified	paired	ILLUMINA	NextSeq 500	The sequencing libraries were prepared, using the Vazyme TruePrep DNA Library Prep Kit V2 for Illumina preparation protocol (Vazyme Biotech Co.,Ltd, Nanjing, China). Whole-genome shotgun sequencing was performed on a NextSeq 500 platform, at a read length of 2 x 150 bp (300 cycles).	fastq	CCP-CHP-1_S20_L001_R1_001.fastq.gz	CCP-CHP-1_S20_L001_R2_001.fastq.gz	CCP-CHP-1_S20_L002_R1_001.fastq.gz	CCP-CHP-1_S20_L002_R2_001.fastq.gz	CCP-CHP-1_S20_L003_R1_001.fastq.gz	CCP-CHP-1_S20_L003_R2_001.fastq.gz	CCP-CHP-1_S20_L004_R1_001.fastq.gz	CCP-CHP-1_S20_L004_R2_001.fastq.gz
SRR13052832	SRP291437	new	PRJNA675073	SAMN16707868	CCP-CHP-2	WGS of Mycolicibacterium smegmatis mc2 155 knock-out mutant MSMEG_6302 (LigC1), MSMEG_6304 (LigC2) and MSMEG_6301(Prim2) B	WGS	GENOMIC	unspecified	paired	ILLUMINA	NextSeq 500	The sequencing libraries were prepared, using the Vazyme TruePrep DNA Library Prep Kit V2 for Illumina preparation protocol (Vazyme Biotech Co.,Ltd, Nanjing, China). Whole-genome shotgun sequencing was performed on a NextSeq 500 platform, at a read length of 2 x 150 bp (300 cycles).	fastq	CCP-CHP-2_S21_L001_R1_001.fastq.gz	CCP-CHP-2_S21_L001_R2_001.fastq.gz	CCP-CHP-2_S21_L002_R1_001.fastq.gz	CCP-CHP-2_S21_L002_R2_001.fastq.gz	CCP-CHP-2_S21_L003_R1_001.fastq.gz	CCP-CHP-2_S21_L003_R2_001.fastq.gz	CCP-CHP-2_S21_L004_R1_001.fastq.gz	CCP-CHP-2_S21_L004_R2_001.fastq.gz
SRR13052831	SRP291437	new	PRJNA675073	SAMN16707869	CCP-CHP-3	WGS of Mycolicibacterium smegmatis mc2 155 knock-out mutant MSMEG_6302 (LigC1), MSMEG_6304 (LigC2) and MSMEG_6301(Prim2) C	WGS	GENOMIC	unspecified	paired	ILLUMINA	NextSeq 500	The sequencing libraries were prepared, using the Vazyme TruePrep DNA Library Prep Kit V2 for Illumina preparation protocol (Vazyme Biotech Co.,Ltd, Nanjing, China). Whole-genome shotgun sequencing was performed on a NextSeq 500 platform, at a read length of 2 x 150 bp (300 cycles).	fastq	CCP-CHP-3_S22_L001_R1_001.fastq.gz	CCP-CHP-3_S22_L001_R2_001.fastq.gz	CCP-CHP-3_S22_L002_R1_001.fastq.gz	CCP-CHP-3_S22_L002_R2_001.fastq.gz	CCP-CHP-3_S22_L003_R1_001.fastq.gz	CCP-CHP-3_S22_L003_R2_001.fastq.gz	CCP-CHP-3_S22_L004_R1_001.fastq.gz	CCP-CHP-3_S22_L004_R2_001.fastq.gz
SRR13052830	SRP291437	new	PRJNA675073	SAMN16707870	CCP-CHP-4	WGS of Mycolicibacterium smegmatis mc2 155 knock-out mutant MSMEG_6302 (LigC1), MSMEG_6304 (LigC2) and MSMEG_6301(Prim2) D	WGS	GENOMIC	unspecified	paired	ILLUMINA	NextSeq 500	The sequencing libraries were prepared, using the Vazyme TruePrep DNA Library Prep Kit V2 for Illumina preparation protocol (Vazyme Biotech Co.,Ltd, Nanjing, China). Whole-genome shotgun sequencing was performed on a NextSeq 500 platform, at a read length of 2 x 150 bp (300 cycles).	fastq	CCP-CHP-4_S23_L001_R1_001.fastq.gz	CCP-CHP-4_S23_L001_R2_001.fastq.gz	CCP-CHP-4_S23_L002_R1_001.fastq.gz	CCP-CHP-4_S23_L002_R2_001.fastq.gz	CCP-CHP-4_S23_L003_R1_001.fastq.gz	CCP-CHP-4_S23_L003_R2_001.fastq.gz	CCP-CHP-4_S23_L004_R1_001.fastq.gz	CCP-CHP-4_S23_L004_R2_001.fastq.gz
SRR13052829	SRP291437	new	PRJNA675073	SAMN16707871	CCP-CHP-5	WGS of Mycolicibacterium smegmatis mc2 155 knock-out mutant MSMEG_6302 (LigC1), MSMEG_6304 (LigC2) and MSMEG_6301(Prim2) E	WGS	GENOMIC	unspecified	paired	ILLUMINA	NextSeq 500	The sequencing libraries were prepared, using the Vazyme TruePrep DNA Library Prep Kit V2 for Illumina preparation protocol (Vazyme Biotech Co.,Ltd, Nanjing, China). Whole-genome shotgun sequencing was performed on a NextSeq 500 platform, at a read length of 2 x 150 bp (300 cycles).	fastq	CCP-CHP-5_S24_L001_R1_001.fastq.gz	CCP-CHP-5_S24_L001_R2_001.fastq.gz	CCP-CHP-5_S24_L002_R1_001.fastq.gz	CCP-CHP-5_S24_L002_R2_001.fastq.gz	CCP-CHP-5_S24_L003_R1_001.fastq.gz	CCP-CHP-5_S24_L003_R2_001.fastq.gz	CCP-CHP-5_S24_L004_R1_001.fastq.gz	CCP-CHP-5_S24_L004_R2_001.fastq.gz
SRR13052828	SRP291437	new	PRJNA675073	SAMN16707872	CCP-CHP-6	WGS of Mycolicibacterium smegmatis mc2 155 knock-out mutant MSMEG_6302 (LigC1), MSMEG_6304 (LigC2) and MSMEG_6301(Prim2) F	WGS	GENOMIC	unspecified	paired	ILLUMINA	NextSeq 500	The sequencing libraries were prepared, using the Vazyme TruePrep DNA Library Prep Kit V2 for Illumina preparation protocol (Vazyme Biotech Co.,Ltd, Nanjing, China). Whole-genome shotgun sequencing was performed on a NextSeq 500 platform, at a read length of 2 x 150 bp (300 cycles).	fastq	CCP-CHP-6_S25_L001_R1_001.fastq.gz	CCP-CHP-6_S25_L001_R2_001.fastq.gz	CCP-CHP-6_S25_L002_R1_001.fastq.gz	CCP-CHP-6_S25_L002_R2_001.fastq.gz	CCP-CHP-6_S25_L003_R1_001.fastq.gz	CCP-CHP-6_S25_L003_R2_001.fastq.gz	CCP-CHP-6_S25_L004_R1_001.fastq.gz	CCP-CHP-6_S25_L004_R2_001.fastq.gz
SRR13052827	SRP291437	new	PRJNA675073	SAMN16707873	CCP-CHP-7	WGS of Mycolicibacterium smegmatis mc2 155 knock-out mutant MSMEG_6302 (LigC1), MSMEG_6304 (LigC2) and MSMEG_6301(Prim2) G	WGS	GENOMIC	unspecified	paired	ILLUMINA	NextSeq 500	The sequencing libraries were prepared, using the Vazyme TruePrep DNA Library Prep Kit V2 for Illumina preparation protocol (Vazyme Biotech Co.,Ltd, Nanjing, China). Whole-genome shotgun sequencing was performed on a NextSeq 500 platform, at a read length of 2 x 150 bp (300 cycles).	fastq	CCP-CHP-7_S26_L001_R1_001.fastq.gz	CCP-CHP-7_S26_L001_R2_001.fastq.gz	CCP-CHP-7_S26_L002_R1_001.fastq.gz	CCP-CHP-7_S26_L002_R2_001.fastq.gz	CCP-CHP-7_S26_L003_R1_001.fastq.gz	CCP-CHP-7_S26_L003_R2_001.fastq.gz	CCP-CHP-7_S26_L004_R1_001.fastq.gz	CCP-CHP-7_S26_L004_R2_001.fastq.gz
SRR13052826	SRP291437	new	PRJNA675073	SAMN16707874	CCP-CHP-8	WGS of Mycolicibacterium smegmatis mc2 155 knock-out mutant MSMEG_6302 (LigC1), MSMEG_6304 (LigC2) and MSMEG_6301(Prim2) H	WGS	GENOMIC	unspecified	paired	ILLUMINA	NextSeq 500	The sequencing libraries were prepared, using the Vazyme TruePrep DNA Library Prep Kit V2 for Illumina preparation protocol (Vazyme Biotech Co.,Ltd, Nanjing, China). Whole-genome shotgun sequencing was performed on a NextSeq 500 platform, at a read length of 2 x 150 bp (300 cycles).	fastq	CCP-CHP-8_S27_L001_R1_001.fastq.gz	CCP-CHP-8_S27_L001_R2_001.fastq.gz	CCP-CHP-8_S27_L002_R1_001.fastq.gz	CCP-CHP-8_S27_L002_R2_001.fastq.gz	CCP-CHP-8_S27_L003_R1_001.fastq.gz	CCP-CHP-8_S27_L003_R2_001.fastq.gz	CCP-CHP-8_S27_L004_R1_001.fastq.gz	CCP-CHP-8_S27_L004_R2_001.fastq.gz
SRR13052825	SRP291437	new	PRJNA675073	SAMN16707875	CCP-CHP-9	WGS of Mycolicibacterium smegmatis mc2 155 knock-out mutant MSMEG_6302 (LigC1), MSMEG_6304 (LigC2) and MSMEG_6301(Prim2) I	WGS	GENOMIC	unspecified	paired	ILLUMINA	NextSeq 500	The sequencing libraries were prepared, using the Vazyme TruePrep DNA Library Prep Kit V2 for Illumina preparation protocol (Vazyme Biotech Co.,Ltd, Nanjing, China). Whole-genome shotgun sequencing was performed on a NextSeq 500 platform, at a read length of 2 x 150 bp (300 cycles).	fastq	CCP-CHP-9_S28_L001_R1_001.fastq.gz	CCP-CHP-9_S28_L001_R2_001.fastq.gz	CCP-CHP-9_S28_L002_R1_001.fastq.gz	CCP-CHP-9_S28_L002_R2_001.fastq.gz	CCP-CHP-9_S28_L003_R1_001.fastq.gz	CCP-CHP-9_S28_L003_R2_001.fastq.gz	CCP-CHP-9_S28_L004_R1_001.fastq.gz	CCP-CHP-9_S28_L004_R2_001.fastq.gz
SRR13052824	SRP291437	new	PRJNA675073	SAMN16707876	CCP-CHP-10	WGS of Mycolicibacterium smegmatis mc2 155 knock-out mutant MSMEG_6302 (LigC1), MSMEG_6304 (LigC2) and MSMEG_6301(Prim2) J	WGS	GENOMIC	unspecified	paired	ILLUMINA	NextSeq 500	The sequencing libraries were prepared, using the Vazyme TruePrep DNA Library Prep Kit V2 for Illumina preparation protocol (Vazyme Biotech Co.,Ltd, Nanjing, China). Whole-genome shotgun sequencing was performed on a NextSeq 500 platform, at a read length of 2 x 150 bp (300 cycles).	fastq	CCP-CHP-10_S29_L001_R1_001.fastq.gz	CCP-CHP-10_S29_L001_R2_001.fastq.gz	CCP-CHP-10_S29_L002_R1_001.fastq.gz	CCP-CHP-10_S29_L002_R2_001.fastq.gz	CCP-CHP-10_S29_L003_R1_001.fastq.gz	CCP-CHP-10_S29_L003_R2_001.fastq.gz	CCP-CHP-10_S29_L004_R1_001.fastq.gz	CCP-CHP-10_S29_L004_R2_001.fastq.gz
