# Supplementary material for: ATP-Dependent Ligases and AEP Primases Affect the Profile and Frequency of Mutations in Mycobacteria under Oxidative Stress
Source: Genes (Basel). 2021 Apr 9;12(4):547. doi: 10.3390/genes12040547 (PMC8068969; doi:10.3390/genes12040547)
Supplement: Supplementary file 1 [file genes-12-00547-s001.zip › Table S4 - sequencing.xlsx]

## Sheet: All mutants vs wild-type
The analysis of all mutants vs the-wild type M. smegmatis strain
position	mutation	CCP	KU	KULigDCCP	KULigD	LigD	annotation	gene	description
463.487	T→G				1		V1767G (GTC→GGC)	MSMEG_RS01975 →	non‑ribosomal peptide synthetase
988.577	C→T					1	L256L (CTG→CTA)	MSMEG_RS04400 ←	class I SAM‑dependent methyltransferase
1,798,834	(C)6→5	1					coding (958/1098 nt)	MSMEG_RS08315 →	sugar‑binding protein
2,136,749	A→G	1					V422A (GTG→GCG)	MSMEG_RS09985 ←	NADH‑quinone oxidoreductase subunit G
2,223,888	2 bp→AC	1				1	coding (1102‑1103/1590 nt)	MSMEG_RS10425 →	HNH endonuclease
2,223,889	A→C				1		H368P (CAC→CCC)	MSMEG_RS10425 →	HNH endonuclease
2,244,454	A→C	1					intergenic (+12/‑11)	MSMEG_RS10510 → / → MSMEG_RS10515	aminopeptidase P family protein/hypothetical protein
2,491,655	C→T	1					intergenic (+24/‑10)	MSMEG_RS11675 → / → MSMEG_RS11680	alpha/beta hydrolase/DsbA family protein
3,109,209	+C		1				pseudogene (338/2620 nt)	MSMEG_RS14755 →	helix‑turn‑helix transcriptional regulator
3,328,242	Δ1 bp				1		coding (677/954 nt)	MSMEG_RS15765 →	hypothetical protein
3,371,375	A→G	1					R164R (CGA→CGG)	MSMEG_RS15985 →	helix‑turn‑helix domain‑containing protein
3,395,003	C→A			1			D72E (GAC→GAA)	MSMEG_RS16095 →	dihydrodipicolinate reductase
3,962,685	Δ225 bp			1			coding (914‑1138/1344 nt)	pafA ←	Pup‑‑protein ligase
4,225,374	C→A			1			intergenic (‑73/‑290)	MSMEG_RS20055 ← / → MSMEG_RS20060	cupin domain‑containing protein/quinone oxidoreductase
4,414,663	+G	1					coding (67/1254 nt)	MSMEG_RS20955 →	beta‑ketoacyl‑ACP synthase
5,077,124	G→T			1	1		R222R (CGG→AGG)	MSMEG_RS24015 ←	phosphotransferase family protein
5,303,583	C→G		1	1	1		L282L (CTG→CTC)	MSMEG_RS25100 ←	hypothetical protein
5,657,718	1339 bp→6 bp			1	1	1	coding (36‑1374/2268 nt)	MSMEG_RS26845 ←	ATP‑dependent DNA ligase
5,659,382	G→A			1	1	1	V279V (GTC→GTT)	ugpC ←	sn‑glycerol‑3‑phosphate ABC transporter ATP‑binding protein UgpC
5,659,917	G→A			1	1	1	A101V (GCG→GTG)	ugpC ←	sn‑glycerol‑3‑phosphate ABC transporter ATP‑binding protein UgpC
5,660,614	T→C			1	1	1	N166D (AAC→GAC)	MSMEG_RS26855 ←	carbohydrate ABC transporter permease
5,660,921	T→C			1	1		T63T (ACA→ACG)	MSMEG_RS26855 ←	carbohydrate ABC transporter permease
5,668,579	T→C		1	1	1		I79V (ATC→GTC)	MSMEG_RS26890 ←	MarR family transcriptional regulator
5,669,053	444 bp→AA		1	1	1		coding (54‑497/957 nt)	MSMEG_RS26895 →	Ku protein
5,669,500	G→T		1	1	1		L167L (CTG→CTT)	MSMEG_RS26895 →	Ku protein
5,766,691	T→C	1					Y42C (TAC→TGC)	MSMEG_RS27345 ←	MFS transporter
6,157,514	C→A			1			A86S (GCG→TCG)	lysS ←	lysine‑‑tRNA ligase
6,241,156	(G)7→8			1	1		intergenic (‑218/‑216)	MSMEG_RS29775 ← / → MSMEG_RS29780	ATPase AAA/HAD‑IB family hydrolase
6,367,324	Δ1 bp	1		1			coding (963/1050 nt)	MSMEG_RS30400 ←	ATP‑dependent DNA ligase
6,367,538	G→A			1			P250L (CCC→CTC)	MSMEG_RS30400 ←	ATP‑dependent DNA ligase
6,367,619	604 bp→GATC	1		1			coding (65‑668/1050 nt)	MSMEG_RS30400 ←	ATP‑dependent DNA ligase
6,367,619	2213 bp→GAT	1						[MSMEG_RS30400]–[MSMEG_RS30410]	[MSMEG_RS30400], MSMEG_RS30405, [MSMEG_RS30410]
6,368,845	Δ989 bp			1				[MSMEG_RS30405]–[MSMEG_RS30410]	[MSMEG_RS30405], [MSMEG_RS30410]
6,370,584	C→A			1			A378S (GCC→TCC)	MSMEG_RS30415 ←	carboxylesterase family protein
6,467,047	2 bp→CT			1	1	1	intergenic (‑111/+43)	MSMEG_RS30855 ← / ← MSMEG_RS30860	esterase family protein/esterase family protein
6,467,050	+CG			1	1	1	intergenic (‑114/+41)	MSMEG_RS30855 ← / ← MSMEG_RS30860	esterase family protein/esterase family protein

## Sheet: mc2 vs mc2-CHP
The analysis of six individual colonies of the-wild type M. smegmatis strain growing in the presence of CHP
position	mutation	mc2-CHP-1	mc2-CHP-2	mc2-CHP-3	mc2-CHP-4	mc2-CHP-5	mc2-CHP-6	annotation	gene	description
425.264	(C)7→6			1				intergenic (+633/‑80)	MSMEG_RS01875 → / → MSMEG_RS01880	nitrile hydratase accessory protein/MmpS family protein
2,223,888	2 bp→AC	1		1				coding (1102‑1103/1590 nt)	MSMEG_RS10425 →	HNH endonuclease
2,223,889	A→C						1	H368P (CAC→CCC)	MSMEG_RS10425 →	HNH endonuclease
3,328,242	Δ1 bp						1	coding (677/954 nt)	MSMEG_RS15765 →	hypothetical protein
3,655,866	T→C			1				L134P (CTG→CCG)	MSMEG_RS17445 →	hypothetical protein
3,693,470	T→G	1						L213R (CTG→CGG)	gndA →	NADP‑dependent phosphogluconate dehydrogenase
4,011,071	Δ1 bp				1			intergenic (‑118/+105)	MSMEG_RS19100 ← / ← MSMEG_RS19105	GAF domain‑containing sensor histidine kinase/AAA family ATPase
5,642,565	C→G						1	S433S (TCC→TCG)	MSMEG_RS26755 →	PAS domain S‑box protein
5,642,568	4 bp→GGTG						1	coding (1302‑1305/1851 nt)	MSMEG_RS26755 →	PAS domain S‑box protein
5,642,574	A→G						1	E436E (GAA→GAG)	MSMEG_RS26755 →	PAS domain S‑box protein
5,642,577	G→A						1	E437E (GAG→GAA)	MSMEG_RS26755 →	PAS domain S‑box protein
5,642,580	T→G						1	L438L (CTT→CTG)	MSMEG_RS26755 →	PAS domain S‑box protein
6,035,135	+T			1				coding (451/1215 nt)	MSMEG_RS28775 ←	glycosyltransferase family 1 protein
6,459,973	C→A				1			D765Y (GAC→TAC)	MSMEG_RS30835 ←	acyltransferase domain‑containing protein
6,464,237	G→A				1			intergenic (‑20/+225)	MSMEG_RS30840 ← / ← MSMEG_RS30845	AMP‑binding protein/cutinase family protein
6,467,047	2 bp→CT	1			1		1	intergenic (‑111/+43)	MSMEG_RS30855 ← / ← MSMEG_RS30860	esterase family protein/esterase family protein
6,467,050	+CG	1			1			intergenic (‑114/+41)	MSMEG_RS30855 ← / ← MSMEG_RS30860	esterase family protein/esterase family protein

## Sheet: KuDCCP vs KuDCCP-CHP
The analysis of ten individual colonies of M. smegmatis KuLigDCCP mutant growing in the presence of CHP
position	mutation	LigDKuCCP_CHP_1	LigDKuCCP_CHP_2	LigDKuCCP_CHP_3	LigDKuCCP_CHP_4	LigDKuCCP_CHP_5	LigDKuCCP_CHP_6	LigDKuCCP_CHP_7	LigDKuCCP_CHP_8	LigDKuCCP_CHP_11	LigDKuCCP_CHP_12	annotation	gene	description
336.059	G→C									1		Y346* (TAC→TAG)	MSMEG_RS01500 ←	bile acid CoA ligase
436.325	G→A										1	G6R (GGG→AGG)	MSMEG_RS01915 →	class I SAM‑dependent methyltransferase
1,832,576	C→T	1										P48S (CCC→TCC)	MSMEG_RS08470 →	SDR family oxidoreductase
2,143,598	C→T							1				G56D (GGT→GAT)	MSMEG_RS10020 ←	response regulator transcription factor
2,223,888	2 bp→AC	1	1	1								coding (1102‑1103/1590 nt)	MSMEG_RS10425 →	HNH endonuclease
2,223,889	A→C	1					1					H368P (CAC→CCC)	MSMEG_RS10425 →	HNH endonuclease
2,829,321	C→A				1							L172I (CTC→ATC)	MSMEG_RS13375 →	inositol monophosphatase
3,109,207	+GC	1	1	1	1	1	1	1		1	1	pseudogene (336/2620 nt)	MSMEG_RS14755 →	helix‑turn‑helix transcriptional regulator
3,205,379	T→A									1		D447V (GAT→GTT)	MSMEG_RS15205 ←	AMP‑binding protein
3,312,029	G→T		1									pseudogene (1452/1540 nt)	MSMEG_RS15690 ←	ATP‑binding cassette domain‑containing protein
3,328,242	Δ1 bp	1	1		1		1					coding (677/954 nt)	MSMEG_RS15765 →	hypothetical protein
4,322,757	C→G	1										P58P (CCC→CCG)	MSMEG_RS20510 →	DUF3153 domain‑containing protein
5,493,871	+C	1	1	1	1	1	1	1	1	1	1	coding (679/1170 nt)	MSMEG_RS26085 ←	DUF501 domain‑containing protein
5,584,345	T→G								1			intergenic (+59/‑371)	MSMEG_RS26500 → / → MSMEG_RS26505	ATPase AAA/PE‑PPE domain‑containing protein
6,493,623	G→T					1						H136N (CAC→AAC)	MSMEG_RS30990 ←	glycerophosphodiester phosphodiesterase

## Sheet: CCP vs CCP-CHP
The analysis of ten individual colonies of M. smegmatis CCP mutant growing in the presence of CHP
position	mutation	CCP_CHP_1	CCP_CHP_2	CCP_CHP_3	CCP_CHP_4	CCP_CHP_5	CCP_CHP_6	CCP_CHP_7	CCP_CHP_8	CCP_CHP_9	CCP_CHP_10	annotation	gene	description
496.77	T→C							1				intergenic (‑25/‑240)	MSMEG_RS02060 ← / → MSMEG_RS02065	hypothetical protein/isocitrate lyase/phosphoenolpyruvate mutase family protein
958.735	C→T									1		A241A (GCG→GCA)	MSMEG_RS04250 ←	xanthine dehydrogenase family protein subunit M
1,499,123	G→T							1				A150S (GCC→TCC)	rpsG →	30S ribosomal protein S7
1,579,539	G→C				1							intergenic (+34/‑121)	MSMEG_RS07265 → / → MSMEG_RS07270	zf‑HC2 domain‑containing protein/thiamine pyrophosphate‑binding protein
2,239,161	C→G								1			A196A (GCC→GCG)	MSMEG_RS10490 →	aldehyde dehydrogenase family protein
3,006,337	A→C				1							E300A (GAG→GCG)	ruvB →	Holliday junction branch migration DNA helicase RuvB
3,294,509	G→A				1							I71I (ATC→ATT)	MSMEG_RS15620 ←	peroxiredoxin
3,328,242	Δ1 bp				1							coding (677/954 nt)	MSMEG_RS15765 →	hypothetical protein
5,584,345	T→G							1				intergenic (+59/‑371)	MSMEG_RS26500 → / → MSMEG_RS26505	ATPase AAA/PE‑PPE domain‑containing protein
5,693,432	+C		1		1	1		1			1	intergenic (+47/‑55)	MSMEG_RS27020 → / → MSMEG_RS27025	hypothetical protein/acetyl‑CoA acetyltransferase
5,955,039	G→A										1	N273N (AAC→AAT)	MSMEG_RS28415 ←	MCE family protein
6,467,047	2 bp→CT		1			1		1			1	intergenic (‑111/+43)	MSMEG_RS30855 ← / ← MSMEG_RS30860	esterase family protein/esterase family protein
6,467,050	+CG		1			1		1				intergenic (‑114/+41)	MSMEG_RS30855 ← / ← MSMEG_RS30860	esterase family protein/esterase family protein
6,769,321	G→C							1				intergenic (‑99/‑190)	MSMEG_RS32390 ← / → MSMEG_RS32395	alpha/beta hydrolase/DUF2236 domain‑containing protein
6,833,466	2 bp→CT							1				coding (76‑77/600 nt)	MSMEG_RS32705 →	dihydrofolate reductase family protein

## Sheet: wild-type-MIX
The analysis of the wild-type M. smegmatis strain growing in the presence of CHP
CHROM	POS	TYPE	REF	ALT	variants	EVIDENCE	FTYPE	STRAND	NT_POS	AA_POS	EFFECT	LOCUS_TAG	GENE	PRODUCT
NC_008596	40142	snp	C	A	#NAME?	A:16 C:115	CDS	+	21091/22572	7031/7523	missense_variant c.21091C>A p.Leu7031Met	MSMEG_RS00090		non-ribosomal peptide synthetase
NC_008596	64971	snp	A	C	#NAME?	C:11 A:93	CDS	+	1427/2469	476/822	missense_variant c.1427A>C p.Asp476Ala	MSMEG_RS00215		hypothetical protein
NC_008596	64992	snp	T	G	#NAME?	G:20 T:43	CDS	+	1448/2469	483/822	missense_variant c.1448T>G p.Val483Gly	MSMEG_RS00215		hypothetical protein
NC_008596	64993	snp	C	G	#NAME?	G:10 C:54	CDS	+	1449/2469	483/822	synonymous_variant c.1449C>G p.Val483Val	MSMEG_RS00215		hypothetical protein
NC_008596	65016	snp,snp	T	A,G	#NAME?	A,G:7,7 T:91	CDS	+	1472/2469	491/822	missense_variant c.1472T>A p.Leu491His	MSMEG_RS00215		hypothetical protein
NC_008596	83630	snp	A	C	#NAME?	C:13 A:104	CDS	+	313/1782	105/593	missense_variant c.313A>C p.Thr105Pro	MSMEG_RS00300	eccCb	type VII secretion protein EccCb
NC_008596	136808	snp	G	T	#NAME?	T:16 G:131
NC_008596	168144	snp	A	T	#NAME?	T:6 A:32	CDS	-	334/1869	112/622	missense_variant c.334T>A p.Trp112Arg	MSMEG_RS00715		HNH endonuclease
NC_008596	198456	snp	A	T	#NAME?	T:23 A:104	CDS	-	236/321	79/106	missense_variant c.236T>A p.Leu79Gln	MSMEG_RS00850		DUF202 domain-containing protein
NC_008596	221841	snp	T	G	#NAME?	G:15 T:105	CDS	+	599/897	200/298	missense_variant c.599T>G p.Val200Gly	MSMEG_RS00965		TIGR03619 family F420-dependent LLM class oxidoreductase
NC_008596	246312	snp	C	A	#NAME?	A:16 C:107
NC_008596	249680	snp	C	G	#NAME?	G:22 C:111	CDS	+	225/657	75/218	synonymous_variant c.225C>G p.Arg75Arg	MSMEG_RS01100		O-methyltransferase
NC_008596	249685	snp	T	G	#NAME?	G:13 T:91	CDS	+	230/657	77/218	missense_variant c.230T>G p.Val77Gly	MSMEG_RS01100		O-methyltransferase
NC_008596	308628	snp	A	C	#NAME?	C:10 A:56	CDS	-	474/1584	158/527	synonymous_variant c.474T>G p.Arg158Arg	MSMEG_RS01360		aldehyde dehydrogenase family protein
NC_008596	308644	snp	G	T	#NAME?	T:14 G:51	CDS	-	458/1584	153/527	stop_gained c.458C>A p.Ser153*	MSMEG_RS01360		aldehyde dehydrogenase family protein
NC_008596	308658	snp	A	C	#NAME?	C:12 A:59	CDS	-	444/1584	148/527	synonymous_variant c.444T>G p.Arg148Arg	MSMEG_RS01360		aldehyde dehydrogenase family protein
NC_008596	308661	snp	C	G	#NAME?	G:12 C:61	CDS	-	441/1584	147/527	synonymous_variant c.441G>C p.Pro147Pro	MSMEG_RS01360		aldehyde dehydrogenase family protein
NC_008596	308667	snp	C	G	#NAME?	G:9 C:72	CDS	-	435/1584	145/527	synonymous_variant c.435G>C p.Pro145Pro	MSMEG_RS01360		aldehyde dehydrogenase family protein
NC_008596	312167	snp,snp	T	A,G	#NAME?	A,G:6,9 T:57	CDS	+	52/213	18/70	missense_variant c.52T>A p.Phe18Ile	MSMEG_RS01375		hypothetical protein
NC_008596	313842	snp	T	G	#NAME?	G:17 T:84	CDS	+	494/1572	165/523	missense_variant c.494T>G p.Val165Gly	MSMEG_RS01385		GMC family oxidoreductase
NC_008596	313850	snp	G	C	#NAME?	C:15 G:95	CDS	+	502/1572	168/523	missense_variant c.502G>C p.Ala168Pro	MSMEG_RS01385		GMC family oxidoreductase
NC_008596	321996	snp	A	T	#NAME?	T:20 A:119	CDS	+	611/1419	204/472	missense_variant c.611A>T p.Gln204Leu	MSMEG_RS01430		wax ester/triacylglycerol synthase family O-acyltransferase
NC_008596	322002	snp	T	G	#NAME?	G:16 T:132	CDS	+	617/1419	206/472	missense_variant c.617T>G p.Val206Gly	MSMEG_RS01430		wax ester/triacylglycerol synthase family O-acyltransferase
NC_008596	333787	snp	C	A	#NAME?	A:17 C:129	CDS	+	516/993	172/330	missense_variant c.516C>A p.Phe172Leu	MSMEG_RS01490		NAD(P)-dependent alcohol dehydrogenase
NC_008596	340171	snp	C	A	#NAME?	A:13 C:108	CDS	+	363/528	121/175	missense_variant c.363C>A p.Phe121Leu	MSMEG_RS01520		dihydrofolate reductase
NC_008596	385035	snp	T	A	#NAME?	A:15 T:125	CDS	+	1333/1425	445/474	missense_variant c.1333T>A p.Ser445Thr	MSMEG_RS01705		MCE family protein
NC_008596	385049	snp	A	C	#NAME?	C:14 A:124	CDS	+	1347/1425	449/474	synonymous_variant c.1347A>C p.Pro449Pro	MSMEG_RS01705		MCE family protein
NC_008596	403087	snp	C	A	#NAME?	A:14 C:106	CDS	-	700/1164	234/387	stop_gained c.700G>T p.Glu234*	MSMEG_RS01785		amidohydrolase family protein
NC_008596	405397	snp	A	C	#NAME?	C:10 A:88	CDS	+	527/1881	176/626	missense_variant c.527A>C p.His176Pro	MSMEG_RS01800		WXG100 family type VII secretion target
NC_008596	429761	snp	G	T	#NAME?	T:17 G:148	CDS	+	1110/2985	370/994	synonymous_variant c.1110G>T p.Pro370Pro	MSMEG_RS01890		RND family transporter
NC_008596	465972	complex	GCCCG	CCCCC	#NAME?	CCCCC:13 GCCCG:100	CDS	+	89/819	30/272	missense_variant c.89_93delGCCCGinsCCCCC p.Arg30Pro	MSMEG_RS01980		GAP family protein
NC_008596	582988	snp	A	C	#NAME?	C:14 A:123	CDS	-	266/777	89/258	missense_variant c.266T>G p.Val89Gly	MSMEG_RS02445		DeoR/GlpR transcriptional regulator
NC_008596	642761	snp	A	C	#NAME?	C:21 A:130	CDS	-	951/1422	317/473	synonymous_variant c.951T>G p.Gly317Gly	MSMEG_RS02755		GNAT family N-acetyltransferase
NC_008596	725022	snp	T	G	#NAME?	G:22 T:93	CDS	-	49/1011	17/336	missense_variant c.49A>C p.Thr17Pro	MSMEG_RS03125		ABC transporter permease
NC_008596	780502	complex,snp	AGGT	TGGG,TGGT	#NAME?	TGGG,TGGT:6,7 AGGT:79	CDS	-	665/1788	222/595	missense_variant c.665T>A p.Leu222Gln	MSMEG_RS03375		Hsp70 family protein
NC_008596	783293	snp	A	C	#NAME?	C:16 A:59
NC_008596	783299	snp	A	T	#NAME?	T:11 A:52
NC_008596	796578	snp	C	A	#NAME?	A:13 C:107
NC_008596	922589	snp	A	C	#NAME?	C:13 A:104	CDS	+	175/456	59/151	missense_variant c.175A>C p.Ser59Arg	MSMEG_RS04080		hypothetical protein
NC_008596	963649	snp	C	A	#NAME?	A:12 C:94	CDS	+	859/933	287/310	missense_variant c.859C>A p.Pro287Thr	MSMEG_RS04275		dihydrodipicolinate synthase family protein
NC_008596	963658	snp	C	A	#NAME?	A:12 C:100	CDS	+	868/933	290/310	missense_variant c.868C>A p.Pro290Thr	MSMEG_RS04275		dihydrodipicolinate synthase family protein
NC_008596	963678	snp	C	A	#NAME?	A:12 C:104	CDS	+	888/933	296/310	synonymous_variant c.888C>A p.Ile296Ile	MSMEG_RS04275		dihydrodipicolinate synthase family protein
NC_008596	967202	snp	C	G	#NAME?	G:12 C:107
NC_008596	971953	snp,snp,snp	A	C,G,T	#NAME?	C,G,T:9,8,10 A:73	CDS	-	858/1491	286/496	synonymous_variant c.858T>G p.Pro286Pro	MSMEG_RS04320		serine/threonine protein kinase
NC_008596	998545	snp	C	A	#NAME?	A:16 C:108
NC_008596	1032822	snp	C	A	#NAME?	A:18 C:118	CDS	+	1245/1668	415/555	missense_variant c.1245C>A p.Phe415Leu	MSMEG_RS04650		uroporphyrinogen-III synthase
NC_008596	1153756	snp,snp	G	C,T	#NAME?	C,T:8,9 G:66	CDS	+	856/1401	286/466	stop_gained c.856G>T p.Glu286*	MSMEG_RS05295		amidase
NC_008596	1189084	snp,snp	G	C,T	#NAME?	C,T:8,18 G:118	CDS	+	205/597	69/198	missense_variant c.205G>C p.Asp69His	MSMEG_RS05485		membrane protein
NC_008596	1199901	snp	A	C	#NAME?	C:12 A:91	CDS	-	1022/1098	341/365	missense_variant c.1022T>G p.Leu341Arg	MSMEG_RS05545		Zn-dependent alcohol dehydrogenase
NC_008596	1241471	snp,snp	A	C,T	#NAME?	C,T:6,9 A:104	CDS	+	137/1215	46/404	missense_variant c.137A>C p.Gln46Pro	MSMEG_RS05750		allantoate amidohydrolase
NC_008596	1271994	snp,snp	A	C,G	#NAME?	C,G:10,9 A:111
NC_008596	1272006	snp	T	G	#NAME?	G:17 T:102
NC_008596	1272018	snp	G	T	#NAME?	T:13 G:112
NC_008596	1280807	snp	T	G	#NAME?	G:15 T:97
NC_008596	1280819	snp	T	G	#NAME?	G:12 T:99
NC_008596	1294886	snp	T	C	#NAME?	C:12 T:105	CDS	-	997/1293	333/430	missense_variant c.997A>G p.Thr333Ala	MSMEG_RS05985		DUF2786 domain-containing protein
NC_008596	1321712	snp	C	A	#NAME?	A:25 C:113	CDS	+	482/1437	161/478	stop_gained c.482C>A p.Ser161*	MSMEG_RS06090		DNA phosphorothioation-associated putative methyltransferase
NC_008596	1425036	snp	G	C	#NAME?	C:10 G:83	CDS	-	301/3252	101/1083	missense_variant c.301C>G p.Arg101Gly	MSMEG_RS06475	recB	exodeoxyribonuclease V subunit beta
NC_008596	1519592	snp	G	T	#NAME?	T:17 G:89
NC_008596	1519594	snp	G	T	#NAME?	T:14 G:92
NC_008596	1519630	snp	C	A	#NAME?	A:15 C:68
NC_008596	1530703	snp	G	T	#NAME?	T:15 G:102	CDS	-	303/1575	101/524	missense_variant c.303C>A p.Phe101Leu	MSMEG_RS06980		MFS transporter
NC_008596	1545315	snp	C	A	#NAME?	A:14 C:94
NC_008596	1574107	snp	A	C	#NAME?	C:9 A:62	CDS	-	65/915	22/304	missense_variant c.65T>G p.Val22Gly	MSMEG_RS07235		class I SAM-dependent methyltransferase
NC_008596	1598930	snp	T	G	#NAME?	G:11 T:91	CDS	+	455/1110	152/369	missense_variant c.455T>G p.Leu152Arg	MSMEG_RS07365		P1 family peptidase
NC_008596	1613636	snp	C	G	#NAME?	G:11 C:96
NC_008596	1613639	snp	G	C	#NAME?	C:20 G:73
NC_008596	1613646	snp	T	G	#NAME?	G:14 T:82
NC_008596	1641094	complex,snp	AGGT	TGGG,TGGT	#NAME?	TGGG,TGGT:8,7 AGGT:70	CDS	+	173/342	58/113	missense_variant c.173A>T p.Gln58Leu	MSMEG_RS07575		pduH protein
NC_008596	1653606	complex,snp	CGC	GGG,GGC	#NAME?	GGG,GGC:23,12 CGC:92	CDS	-	847/1476	283/491	missense_variant c.847G>C p.Asp283His	MSMEG_RS07650		carotenoid oxygenase family protein
NC_008596	1667607	snp	C	G	#NAME?	G:12 C:98	CDS	+	707/1059	236/352	missense_variant c.707C>G p.Ala236Gly	MSMEG_RS07705		alpha/beta hydrolase
NC_008596	1719222	snp	G	T	#NAME?	T:14 G:54
NC_008596	2000098	ins	G	GGGC	#NAME?	GGGC:10 G:0
NC_008596	2000105	snp	G	T	#NAME?	T:10 G:25
NC_008596	2040157	snp,snp	T	A,G	#NAME?	A,G:12,11 T:101
NC_008596	2040161	snp	C	A	#NAME?	A:27 C:99
NC_008596	2044644	snp,snp	G	C,T	#NAME?	C,T:6,11 G:83	CDS	+	2056/3399	686/1132	stop_gained c.2056G>T p.Glu686*	MSMEG_RS09525		AAA family ATPase
NC_008596	2044651	snp	A	C	#NAME?	C:11 A:82	CDS	+	2063/3399	688/1132	missense_variant c.2063A>C p.Glu688Ala	MSMEG_RS09525		AAA family ATPase
NC_008596	2047147	snp,snp	A	C,T	#NAME?	C,T:9,9 A:101	CDS	+	1038/1401	346/466	synonymous_variant c.1038A>C p.Ala346Ala	MSMEG_RS09530		FAD-binding oxidoreductase
NC_008596	2117028	snp	G	T	#NAME?	T:11 G:38	CDS	+	949/1560	317/519	missense_variant c.949G>T p.Asp317Tyr	MSMEG_RS09890		NAD(P)/FAD-dependent oxidoreductase
NC_008596	2117045	snp	C	A	#NAME?	A:6 C:53	CDS	+	966/1560	322/519	missense_variant c.966C>A p.His322Gln	MSMEG_RS09890		NAD(P)/FAD-dependent oxidoreductase
NC_008596	2129644	snp	C	A	#NAME?	A:13 C:103	CDS	-	1277/1590	426/529	missense_variant c.1277G>T p.Arg426Leu	MSMEG_RS09955		NADH-quinone oxidoreductase subunit M
NC_008596	2168921	snp	C	A	#NAME?	A:14 C:92	CDS	+	882/1104	294/367	missense_variant c.882C>A p.Phe294Leu	MSMEG_RS10155		P1 family peptidase
NC_008596	2208562	snp	G	T	#NAME?	T:15 G:106	CDS	-	797/1071	266/356	missense_variant c.797C>A p.Ser266Tyr	MSMEG_RS10350		DUF190 domain-containing protein
NC_008596	2288187	snp	A	T	#NAME?	T:14 A:120	CDS	+	996/1218	332/405	synonymous_variant c.996A>T p.Ala332Ala	MSMEG_RS10710		acetyl-CoA C-acetyltransferase
NC_008596	2288198	snp	A	T	#NAME?	T:13 A:114	CDS	+	1007/1218	336/405	missense_variant c.1007A>T p.Glu336Val	MSMEG_RS10710		acetyl-CoA C-acetyltransferase
NC_008596	2288202	snp	G	T	#NAME?	T:19 G:113	CDS	+	1011/1218	337/405	missense_variant c.1011G>T p.Trp337Cys	MSMEG_RS10710		acetyl-CoA C-acetyltransferase
NC_008596	2312402	snp,snp	C	A,G	#NAME?	A,G:9,7 C:109	CDS	+	804/1050	268/349	missense_variant c.804C>A p.Phe268Leu	MSMEG_RS10825		acyl-CoA dehydrogenase family protein
NC_008596	2350131	snp	A	C	#NAME?	C:12 A:84	CDS	+	56/888	19/295	missense_variant c.56A>C p.Asn19Thr	MSMEG_RS10985		NifU family protein
NC_008596	2363171	snp	C	G	#NAME?	G:7 C:53
NC_008596	2430021	snp	T	G	#NAME?	G:15 T:92
NC_008596	2434415	snp,snp	T	A,G	#NAME?	A,G:6,10 T:70
NC_008596	2434430	snp	C	G	#NAME?	G:11 C:93
NC_008596	2434476	snp	C	A	#NAME?	A:14 C:98
NC_008596	2570176	snp	T	A	#NAME?	A:7 T:35
NC_008596	2570194	snp	A	T	#NAME?	T:8 A:33
NC_008596	2593592	snp	T	G	#NAME?	G:15 T:107	CDS	+	320/369	107/122	missense_variant c.320T>G p.Val107Gly	MSMEG_RS12165		YraN family protein
NC_008596	2600261	snp	C	A	#NAME?	A:6 C:10	CDS	-	894/1700	298/565	synonymous_variant c.894G>T p.Ser298Ser	MSMEG_RS12195		DUF222 domain-containing protein
NC_008596	2800808	snp	C	G	#NAME?	G:9 C:58	CDS	-	72/1365	24/454	missense_variant c.72G>C p.Lys24Asn	MSMEG_RS13240		DUF349 domain-containing protein
NC_008596	2800816	snp	T	G	#NAME?	G:9 T:65	CDS	-	64/1365	22/454	missense_variant c.64A>C p.Thr22Pro	MSMEG_RS13240		DUF349 domain-containing protein
NC_008596	2803654	snp	T	G	#NAME?	G:11 T:68	CDS	+	156/876	52/291	synonymous_variant c.156T>G p.Gly52Gly	MSMEG_RS13260		diaminopimelate epimerase
NC_008596	2812224	snp	C	G	#NAME?	G:25 C:19	CDS	+	2033/2436	678/811	missense_variant c.2033C>G p.Ala678Gly	MSMEG_RS13280		hypothetical protein
NC_008596	2826169	snp	G	T	#NAME?	T:9 G:78
NC_008596	2838389	snp	T	G	#NAME?	G:11 T:86	CDS	+	395/1194	132/397	missense_variant c.395T>G p.Val132Gly	MSMEG_RS13435		class I SAM-dependent RNA methyltransferase
NC_008596	2838795	snp	C	A	#NAME?	A:14 C:82	CDS	+	801/1194	267/397	missense_variant c.801C>A p.Phe267Leu	MSMEG_RS13435		class I SAM-dependent RNA methyltransferase
NC_008596	2880371	snp	T	G	#NAME?	G:7 T:46	CDS	+	164/297	55/98	missense_variant c.164T>G p.Val55Gly	MSMEG_RS13655		ABC transporter ATP-binding protein
NC_008596	2946514	snp	C	G	#NAME?	G:17 C:74	CDS	-	499/1584	167/527	missense_variant c.499G>C p.Ala167Pro	MSMEG_RS13985		acyl-CoA synthetase
NC_008596	2952396	snp	T	G	#NAME?	G:10 T:77	CDS	-	752/951	251/316	missense_variant c.752A>C p.His251Pro	MSMEG_RS14015		alpha/beta hydrolase
NC_008596	3023695	snp	G	C	#NAME?	C:10 G:87	CDS	+	565/1863	189/620	missense_variant c.565G>C p.Gly189Arg	MSMEG_RS14380	secD	protein translocase subunit SecD
NC_008596	3023699	snp	A	C	#NAME?	C:11 A:84	CDS	+	569/1863	190/620	missense_variant c.569A>C p.Glu190Ala	MSMEG_RS14380	secD	protein translocase subunit SecD
NC_008596	3023730	snp,snp	T	A,G	#NAME?	A,G:8,6 T:91	CDS	+	600/1863	200/620	synonymous_variant c.600T>A p.Pro200Pro	MSMEG_RS14380	secD	protein translocase subunit SecD
NC_008596	3023748	snp	A	C	#NAME?	C:13 A:99	CDS	+	618/1863	206/620	synonymous_variant c.618A>C p.Ala206Ala	MSMEG_RS14380	secD	protein translocase subunit SecD
NC_008596	3027285	snp	G	C	#NAME?	C:12 G:89	CDS	+	1014/1668	338/555	synonymous_variant c.1014G>C p.Pro338Pro	MSMEG_RS14390		hypothetical protein
NC_008596	3105783	complex	T	GTG	#NAME?	GTG:13 T:0	CDS	+	1066/1134	356/377	frameshift_variant&missense_variant c.1066delTinsGTG p.Cys356fs	MSMEG_RS14730		3-dehydroquinate synthase
NC_008596	3105805	snp	T	C	#NAME?	C:26 T:0	CDS	+	1088/1134	363/377	missense_variant c.1088T>C p.Leu363Pro	MSMEG_RS14730		3-dehydroquinate synthase
NC_008596	3109206	ins	A	ACG	#NAME?	ACG:37 A:0	CDS	+	337/2620	113/872	frameshift_variant c.336_337insGC p.Pro113fs	MSMEG_RS14755		helix-turn-helix transcriptional regulator
NC_008596	3116640	snp	A	T	#NAME?	T:11 A:84	CDS	+	59/1335	20/444	missense_variant c.59A>T p.Glu20Val	MSMEG_RS14790		dihydroorotase
NC_008596	3120964	snp	A	T	#NAME?	T:9 A:74	CDS	+	1301/3348	434/1115	missense_variant c.1301A>T p.Gln434Leu	MSMEG_RS14805	carB	carbamoyl-phosphate synthase large subunit
NC_008596	3146649	snp	A	C	#NAME?	C:14 A:98	CDS	+	1191/1320	397/439	missense_variant c.1191A>C p.Lys397Asn	MSMEG_RS14920		bifunctional 3,4-dihydroxy-2-butanone-4-phosphate synthase/GTP cyclohydrolase II
NC_008596	3150035	snp	A	C	#NAME?	C:16 A:121	CDS	-	92/1911	31/636	missense_variant c.92T>G p.Val31Gly	MSMEG_RS14940	ggt	gamma-glutamyltransferase
NC_008596	3152170	snp	T	G	#NAME?	G:12 T:100	CDS	+	1943/2121	648/706	missense_variant c.1943T>G p.Leu648Arg	MSMEG_RS14950	uvrC	excinuclease ABC subunit UvrC
NC_008596	3160079	complex	TGGCC	GGGCG	#NAME?	GGGCG:11 TGGCC:70	CDS	+	545/786	182/261	missense_variant c.545_549delTGGCCinsGGGCG p.Val182Gly	MSMEG_RS14990		triose-phosphate isomerase
NC_008596	3196614	snp	A	C	#NAME?	C:14 A:92	CDS	+	122/735	41/244	missense_variant c.122A>C p.His41Pro	MSMEG_RS15155		transcriptional regulator
NC_008596	3196630	snp	C	A	#NAME?	A:12 C:87	CDS	+	138/735	46/244	synonymous_variant c.138C>A p.Ile46Ile	MSMEG_RS15155		transcriptional regulator
NC_008596	3196661	snp	G	C	#NAME?	C:13 G:93	CDS	+	169/735	57/244	missense_variant c.169G>C p.Ala57Pro	MSMEG_RS15155		transcriptional regulator
NC_008596	3209426	snp	C	G	#NAME?	G:15 C:83	CDS	+	207/528	69/175	synonymous_variant c.207C>G p.Ala69Ala	MSMEG_RS15220		hypothetical protein
NC_008596	3259164	snp,snp	C	A,G	#NAME?	A,G:6,7 C:104	CDS	+	771/1281	257/426	missense_variant c.771C>A p.Phe257Leu	MSMEG_RS15455	ilvA	threonine ammonia-lyase IlvA
NC_008596	3269577	snp	C	G	#NAME?	G:20 C:48
NC_008596	3293767	snp,snp	C	A,G	#NAME?	A,G:11,7 C:95	CDS	-	373/798	125/265	stop_gained c.373G>T p.Glu125*	MSMEG_RS15615		ATP-binding cassette domain-containing protein
NC_008596	3328228	snp	A	G	#NAME?	G:9 A:34	CDS	+	663/954	221/317	synonymous_variant c.663A>G p.Gly221Gly	MSMEG_RS15765		hypothetical protein
NC_008596	3328231	snp	C	G	#NAME?	G:6 C:43	CDS	+	666/954	222/317	synonymous_variant c.666C>G p.Gly222Gly	MSMEG_RS15765		hypothetical protein
NC_008596	3328237	snp	A	C	#NAME?	C:8 A:38	CDS	+	672/954	224/317	synonymous_variant c.672A>C p.Ala224Ala	MSMEG_RS15765		hypothetical protein
NC_008596	3328242	complex	GCCCT	CC	#NAME?	CC:29 GCCCT:0	CDS	+	677/954	226/317	missense_variant&conservative_inframe_deletion c.677_681delGCCCTinsCC p.Gly226_Pro227delinsAla	MSMEG_RS15765		hypothetical protein
NC_008596	3336251	snp	A	T	#NAME?	T:9 A:76
NC_008596	3339681	snp	G	C	#NAME?	C:12 G:106	CDS	+	158/1221	53/406	missense_variant c.158G>C p.Arg53Pro	MSMEG_RS15835		acyl-CoA dehydrogenase family protein
NC_008596	3352863	snp	C	A	#NAME?	A:16 C:96	CDS	+	231/1743	77/580	missense_variant c.231C>A p.Phe77Leu	MSMEG_RS15895	derK	D-erythrulose 4-kinase
NC_008596	3371791	snp	C	A	#NAME?	A:16 C:96	CDS	+	908/2775	303/924	stop_gained c.908C>A p.Ser303*	MSMEG_RS15985		helix-turn-helix domain-containing protein
NC_008596	3395895	snp	C	G	#NAME?	G:10 C:81	CDS	-	1333/1479	445/492	missense_variant c.1333G>C p.Ala445Pro	MSMEG_RS16100		MFS transporter
NC_008596	3395905	snp	C	G	#NAME?	G:11 C:80	CDS	-	1323/1479	441/492	synonymous_variant c.1323G>C p.Pro441Pro	MSMEG_RS16100		MFS transporter
NC_008596	3401274	snp	A	C	#NAME?	C:11 A:84	CDS	+	683/1659	228/552	missense_variant c.683A>C p.Gln228Pro	MSMEG_RS16120		CoA transferase
NC_008596	3444518	snp,snp	G	C,T	#NAME?	C,T:7,8 G:111	CDS	-	1090/1104	364/367	missense_variant c.1090C>G p.Pro364Ala	MSMEG_RS16405		DUF2236 domain-containing protein
NC_008596	3456739	snp	T	G	#NAME?	G:16 T:104	CDS	-	79/1341	27/446	missense_variant c.79A>C p.Thr27Pro	MSMEG_RS16460		MHS family MFS transporter
NC_008596	3479920	snp	C	A	#NAME?	A:12 C:56
NC_008596	3492948	snp	G	C	#NAME?	C:13 G:88	CDS	-	441/1425	147/474	synonymous_variant c.441C>G p.Ala147Ala	MSMEG_RS16640		MHS family MFS transporter
NC_008596	3492976	snp,snp	T	A,G	#NAME?	A,G:6,7 T:83	CDS	-	413/1425	138/474	missense_variant c.413A>T p.Gln138Leu	MSMEG_RS16640		MHS family MFS transporter
NC_008596	3492985	snp	C	A	#NAME?	A:11 C:87	CDS	-	404/1425	135/474	missense_variant c.404G>T p.Arg135Leu	MSMEG_RS16640		MHS family MFS transporter
NC_008596	3495532	snp	C	A	#NAME?	A:13 C:106	CDS	+	774/783	258/260	synonymous_variant c.774C>A p.Ile258Ile	MSMEG_RS16650		IclR family transcriptional regulator
NC_008596	3537989	snp	G	C	#NAME?	C:13 G:95	CDS	+	117/1281	39/426	synonymous_variant c.117G>C p.Ala39Ala	MSMEG_RS16865		GTP cyclohydrolase II
NC_008596	3541019	complex	GCCCG	CCCCC	#NAME?	CCCCC:23 GCCCG:81
NC_008596	3545499	snp	A	C	#NAME?	C:14 A:114
NC_008596	3564387	snp	G	C	#NAME?	C:16 G:121	CDS	+	589/603	197/200	missense_variant c.589G>C p.Ala197Pro	MSMEG_RS17000		hypothetical protein
NC_008596	3569102	snp	T	G	#NAME?	G:11 T:72	CDS	+	531/1398	177/465	synonymous_variant c.531T>G p.Gly177Gly	MSMEG_RS17030		aspartate aminotransferase family protein
NC_008596	3599796	snp	T	G	#NAME?	G:14 T:109	CDS	+	1605/1875	535/624	synonymous_variant c.1605T>G p.Gly535Gly	MSMEG_RS17180		MFS transporter
NC_008596	3611333	snp	T	A	#NAME?	A:12 T:101	CDS	+	1142/1278	381/425	missense_variant c.1142T>A p.Leu381His	MSMEG_RS17250		cytochrome P450
NC_008596	3622053	snp	A	T	#NAME?	T:17 A:114	CDS	-	1226/1371	409/456	missense_variant c.1226T>A p.Leu409Gln	MSMEG_RS17300		glutamine synthetase
NC_008596	3622062	snp	A	T	#NAME?	T:15 A:110	CDS	-	1217/1371	406/456	missense_variant c.1217T>A p.Leu406Gln	MSMEG_RS17300		glutamine synthetase
NC_008596	3622074	snp	T	G	#NAME?	G:13 T:104	CDS	-	1205/1371	402/456	missense_variant c.1205A>C p.Gln402Pro	MSMEG_RS17300		glutamine synthetase
NC_008596	3632964	snp	C	A	#NAME?	A:18 C:99	CDS	+	134/1134	45/377	missense_variant c.134C>A p.Ser45Tyr	MSMEG_RS17355		membrane protein
NC_008596	3665726	snp	C	G	#NAME?	G:13 C:73	CDS	-	1163/1539	388/512	missense_variant c.1163G>C p.Arg388Pro	MSMEG_RS17485		sugar ABC transporter ATP-binding protein
NC_008596	3665730	snp	T	G	#NAME?	G:13 T:55	CDS	-	1159/1539	387/512	missense_variant c.1159A>C p.Ser387Arg	MSMEG_RS17485		sugar ABC transporter ATP-binding protein
NC_008596	3665735	snp	A	C	#NAME?	C:11 A:56	CDS	-	1154/1539	385/512	missense_variant c.1154T>G p.Leu385Arg	MSMEG_RS17485		sugar ABC transporter ATP-binding protein
NC_008596	3690284	snp	C	G	#NAME?	G:12 C:61
NC_008596	3690288	snp	T	C	#NAME?	C:9 T:26
NC_008596	3743736	snp	T	G	#NAME?	G:14 T:121	CDS	+	58/1482	20/493	missense_variant c.58T>G p.Ser20Ala	MSMEG_RS17850		serine/threonine protein kinase
NC_008596	3743744	snp	G	T	#NAME?	T:20 G:121	CDS	+	66/1482	22/493	synonymous_variant c.66G>T p.Gly22Gly	MSMEG_RS17850		serine/threonine protein kinase
NC_008596	3789151	snp	G	T	#NAME?	T:13 G:95	CDS	-	1038/1131	346/376	synonymous_variant c.1038C>A p.Ala346Ala	MSMEG_RS18045	pqqE	pyrroloquinoline quinone biosynthesis protein PqqE
NC_008596	3789161	snp	A	C	#NAME?	C:15 A:97	CDS	-	1028/1131	343/376	missense_variant c.1028T>G p.Val343Gly	MSMEG_RS18045	pqqE	pyrroloquinoline quinone biosynthesis protein PqqE
NC_008596	3803715	snp	C	A	#NAME?	A:16 C:96	CDS	-	475/1416	159/471	stop_gained c.475G>T p.Glu159*	MSMEG_RS18115		ribosome biogenesis GTPase Der
NC_008596	3803735	snp	T	A	#NAME?	A:13 T:104	CDS	-	455/1416	152/471	missense_variant c.455A>T p.Lys152Met	MSMEG_RS18115		ribosome biogenesis GTPase Der
NC_008596	3837505	snp	A	C	#NAME?	C:12 A:76	CDS	-	389/1410	130/469	missense_variant c.389T>G p.Val130Gly	MSMEG_RS18270	argH	argininosuccinate lyase
NC_008596	3837511	snp	T	G	#NAME?	G:11 T:67	CDS	-	383/1410	128/469	missense_variant c.383A>C p.Asp128Ala	MSMEG_RS18270	argH	argininosuccinate lyase
NC_008596	3837926	snp	C	A	#NAME?	A:10 C:78
NC_008596	3847882	complex,snp	ACCCT	CCCCA,ACCCA	#NAME?	CCCCA,ACCCA:7,13 ACCCT:87	CDS	-	874/1071	290/356	missense_variant c.870_874delAGGGTinsTGGGG p.Trp292Gly	MSMEG_RS18315	pheS	phenylalanine--tRNA ligase subunit alpha
NC_008596	3847896	snp,snp	T	A,G	#NAME?	A,G:6,8 T:98	CDS	-	860/1071	287/356	missense_variant c.860A>T p.Lys287Met	MSMEG_RS18315	pheS	phenylalanine--tRNA ligase subunit alpha
NC_008596	3847923	snp	T	A	#NAME?	A:13 T:113	CDS	-	833/1071	278/356	missense_variant c.833A>T p.Glu278Val	MSMEG_RS18315	pheS	phenylalanine--tRNA ligase subunit alpha
NC_008596	3916397	snp	C	G	#NAME?	G:9 C:30
NC_008596	3964852	snp,snp	T	A,G	#NAME?	A,G:8,7 T:102	CDS	+	863/882	288/293	missense_variant c.863T>A p.Leu288His	MSMEG_RS18865		alpha/beta hydrolase
NC_008596	3976770	snp	A	C	#NAME?	C:10 A:62	CDS	+	37/564	13/187	missense_variant c.37A>C p.Thr13Pro	MSMEG_RS18930		hypothetical protein
NC_008596	4000301	snp	T	G	#NAME?	G:13 T:101	CDS	-	203/1104	68/367	missense_variant c.203A>C p.Asp68Ala	MSMEG_RS19055		4Fe-4S dicluster domain-containing protein
NC_008596	4000337	snp	A	C	#NAME?	C:13 A:109	CDS	-	167/1104	56/367	missense_variant c.167T>G p.Val56Gly	MSMEG_RS19055		4Fe-4S dicluster domain-containing protein
NC_008596	4059466	snp	G	T	#NAME?	T:17 G:112
NC_008596	4102884	snp	G	C	#NAME?	C:9 G:80
NC_008596	4247247	snp	T	A	#NAME?	A:10 T:64	CDS	-	1124/1590	375/529	missense_variant c.1124A>T p.Glu375Val	MSMEG_RS20165		propionate CoA-transferase
NC_008596	4296314	snp,snp	A	C,T	#NAME?	C,T:8,7 A:74	CDS	+	458/663	153/220	missense_variant c.458A>C p.Lys153Thr	MSMEG_RS20385		response regulator
NC_008596	4321117	snp	T	G	#NAME?	G:15 T:60
NC_008596	4321122	complex	CCGGGT	GGGGGG	#NAME?	GGGGGG:13 CCGGGT:53
NC_008596	4358476	snp	A	C	#NAME?	C:18 A:97	CDS	+	389/1056	130/351	missense_variant c.389A>C p.His130Pro	MSMEG_RS20690	cobT	nicotinate-nucleotide--dimethylbenzimidazole phosphoribosyltransferase
NC_008596	4358492	snp	T	G	#NAME?	G:15 T:94	CDS	+	405/1056	135/351	synonymous_variant c.405T>G p.Gly135Gly	MSMEG_RS20690	cobT	nicotinate-nucleotide--dimethylbenzimidazole phosphoribosyltransferase
NC_008596	4358494	snp,snp	C	A,G	#NAME?	A,G:7,12 C:91	CDS	+	407/1056	136/351	stop_gained c.407C>A p.Ser136*	MSMEG_RS20690	cobT	nicotinate-nucleotide--dimethylbenzimidazole phosphoribosyltransferase
NC_008596	4358509	snp	T	G	#NAME?	G:13 T:96	CDS	+	422/1056	141/351	missense_variant c.422T>G p.Val141Gly	MSMEG_RS20690	cobT	nicotinate-nucleotide--dimethylbenzimidazole phosphoribosyltransferase
NC_008596	4359259	snp,snp	T	A,G	#NAME?	A,G:6,10 T:91	CDS	+	97/726	33/241	missense_variant c.97T>A p.Phe33Ile	MSMEG_RS20695		adenosylcobinamide-GDP ribazoletransferase
NC_008596	4365543	snp	C	A	#NAME?	A:16 C:127	CDS	-	1041/1737	347/578	synonymous_variant c.1041G>T p.Ala347Ala	MSMEG_RS20720		SDR family oxidoreductase
NC_008596	4383346	snp	C	G	#NAME?	G:15 C:82	CDS	-	91/1503	31/500	missense_variant c.91G>C p.Ala31Pro	MSMEG_RS20790		alpha/beta hydrolase
NC_008596	4386020	snp	C	G	#NAME?	G:12 C:88	CDS	-	507/1398	169/465	synonymous_variant c.507G>C p.Pro169Pro	MSMEG_RS20800		wax ester/triacylglycerol synthase family O-acyltransferase
NC_008596	4473132	snp	G	T	#NAME?	T:11 G:87	CDS	+	2857/2877	953/958	missense_variant c.2857G>T p.Asp953Tyr	MSMEG_RS21205		MMPL family transporter
NC_008596	4514220	snp	G	T	#NAME?	T:12 G:105	CDS	-	2366/2832	789/943	missense_variant c.2366C>A p.Ser789Tyr	MSMEG_RS21425		LuxR family transcriptional regulator
NC_008596	4526683	snp	C	A	#NAME?	A:16 C:101	CDS	-	130/921	44/306	stop_gained c.130G>T p.Glu44*	MSMEG_RS21470		NADP-dependent oxidoreductase
NC_008596	4620317	snp	C	G	#NAME?	G:11 C:81	CDS	-	46/858	16/285	missense_variant c.46G>C p.Ala16Pro	MSMEG_RS21880	cysT	sulfate ABC transporter permease subunit CysT
NC_008596	4621608	snp	G	T	#NAME?	T:15 G:122
NC_008596	4637221	snp	A	C	#NAME?	C:11 A:86	CDS	+	507/916	169/304	synonymous_variant c.507A>C p.Ala169Ala	MSMEG_RS21950		zinc-binding dehydrogenase
NC_008596	4654618	snp	C	A	#NAME?	A:13 C:91	CDS	+	91/248	31/81	missense_variant c.91C>A p.Pro31Thr	MSMEG_RS22030		hypothetical protein
NC_008596	4676705	snp	T	G	#NAME?	G:11 T:93	CDS	+	143/861	48/286	missense_variant c.143T>G p.Val48Gly	MSMEG_RS22145		ribokinase
NC_008596	4676720	snp	C	G	#NAME?	G:14 C:88	CDS	+	158/861	53/286	missense_variant c.158C>G p.Ala53Gly	MSMEG_RS22145		ribokinase
NC_008596	4686170	snp	G	C	#NAME?	C:12 G:90
NC_008596	4686174	snp	T	G	#NAME?	G:11 T:93
NC_008596	4724257	snp	G	C	#NAME?	C:8 G:51
NC_008596	4774357	snp	G	C	#NAME?	C:17 G:89	CDS	+	79/405	27/134	missense_variant c.79G>C p.Asp27His	MSMEG_RS22620		DUF732 domain-containing protein
NC_008596	4774358	snp	A	C	#NAME?	C:24 A:86	CDS	+	80/405	27/134	missense_variant c.80A>C p.Asp27Ala	MSMEG_RS22620		DUF732 domain-containing protein
NC_008596	4777268	snp	C	G	#NAME?	G:14 C:88	CDS	+	2548/2583	850/860	missense_variant c.2548C>G p.Arg850Gly	MSMEG_RS22625	pepN	aminopeptidase N
NC_008596	4782653	snp	C	G	#NAME?	G:6 C:41	CDS	-	4504/4785	1502/1594	missense_variant c.4504G>C p.Asp1502His	MSMEG_RS22670		NAD-glutamate dehydrogenase
NC_008596	4782659	snp	T	G	#NAME?	G:7 T:32	CDS	-	4498/4785	1500/1594	missense_variant c.4498A>C p.Ser1500Arg	MSMEG_RS22670		NAD-glutamate dehydrogenase
NC_008596	4864372	snp	T	A	#NAME?	A:10 T:70	CDS	+	787/1107	263/368	missense_variant c.787T>A p.Phe263Ile	MSMEG_RS22945		ABC transporter ATP-binding protein
NC_008596	4864384	snp	T	A	#NAME?	A:9 T:71	CDS	+	799/1107	267/368	missense_variant c.799T>A p.Ser267Thr	MSMEG_RS22945		ABC transporter ATP-binding protein
NC_008596	4990371	snp	A	C	#NAME?	C:17 A:77	CDS	-	161/261	54/86	missense_variant c.161T>G p.Val54Gly	MSMEG_RS23585		hypothetical protein
NC_008596	4990386	snp	A	C	#NAME?	C:14 A:76	CDS	-	146/261	49/86	missense_variant c.146T>G p.Val49Gly	MSMEG_RS23585		hypothetical protein
NC_008596	5009690	snp	G	T	#NAME?	T:17 G:104
NC_008596	5018556	snp	G	T	#NAME?	T:16 G:103	CDS	+	370/1608	124/535	stop_gained c.370G>T p.Glu124*	MSMEG_RS23735		adenylate/guanylate cyclase domain-containing protein
NC_008596	5046383	snp	A	C	#NAME?	C:12 A:60	CDS	-	206/1080	69/359	missense_variant c.206T>G p.Leu69Arg	MSMEG_RS23860	prfA	peptide chain release factor 1
NC_008596	5106230	snp,snp	A	C,T	#NAME?	C,T:8,9 A:114	CDS	+	1055/1737	352/578	missense_variant c.1055A>C p.Gln352Pro	MSMEG_RS24150		ABC transporter ATP-binding protein
NC_008596	5113202	snp,snp	A	C,T	#NAME?	C,T:8,8 A:102	CDS	-	382/825	128/274	missense_variant c.382T>G p.Ser128Ala	MSMEG_RS24180		hypothetical protein
NC_008596	5115070	snp	C	G	#NAME?	G:42 C:95	CDS	-	514/1125	172/374	missense_variant c.514G>C p.Ala172Pro	MSMEG_RS24195		adenylate/guanylate cyclase domain-containing protein
NC_008596	5176080	snp	G	C	#NAME?	C:15 G:111	CDS	+	571/1563	191/520	missense_variant c.571G>C p.Gly191Arg	MSMEG_RS24485		ABC transporter
NC_008596	5176099	snp,snp	T	A,G	#NAME?	A,G:8,8 T:100	CDS	+	590/1563	197/520	missense_variant c.590T>A p.Leu197His	MSMEG_RS24485		ABC transporter
NC_008596	5198644	snp	T	G	#NAME?	G:13 T:106
NC_008596	5198651	snp	G	T	#NAME?	T:15 G:102
NC_008596	5198652	snp,snp	C	A,G	#NAME?	A,G:6,6 C:107
NC_008596	5207504	snp	T	G	#NAME?	G:7 T:18	CDS	-	1702/1848	568/615	missense_variant c.1702A>C p.Ile568Leu	MSMEG_RS24620		HNH endonuclease
NC_008596	5207510	snp	T	G	#NAME?	G:8 T:16	CDS	-	1696/1848	566/615	missense_variant c.1696A>C p.Thr566Pro	MSMEG_RS24620		HNH endonuclease
NC_008596	5216034	snp	T	G	#NAME?	G:11 T:87	CDS	-	602/954	201/317	missense_variant c.602A>C p.Glu201Ala	MSMEG_RS24675		proline dehydrogenase family protein
NC_008596	5216049	snp,snp	T	A,G	#NAME?	A,G:6,6 T:95	CDS	-	587/954	196/317	missense_variant c.587A>T p.Lys196Met	MSMEG_RS24675		proline dehydrogenase family protein
NC_008596	5216064	snp	C	A	#NAME?	A:15 C:94	CDS	-	572/954	191/317	missense_variant c.572G>T p.Arg191Leu	MSMEG_RS24675		proline dehydrogenase family protein
NC_008596	5218909	snp	A	C	#NAME?	C:13 A:107	CDS	+	561/1578	187/525	synonymous_variant c.561A>C p.Pro187Pro	MSMEG_RS24685		helix-turn-helix domain-containing protein
NC_008596	5246858	snp	A	C	#NAME?	C:16 A:123	CDS	-	408/1428	136/475	synonymous_variant c.408T>G p.Gly136Gly	MSMEG_RS24795		beta-glucosidase
NC_008596	5302515	snp	C	A	#NAME?	A:12 C:104	CDS	-	25/765	9/254	stop_gained c.25G>T p.Glu9*	MSMEG_RS25090		SDR family oxidoreductase
NC_008596	5338102	snp	G	T	#NAME?	T:14 G:107	CDS	-	542/990	181/329	missense_variant c.542C>A p.Ser181Tyr	MSMEG_RS25290		NAD(P)H nitroreductase
NC_008596	5372274	snp	T	G	#NAME?	G:16 T:134	CDS	-	433/549	145/182	missense_variant c.433A>C p.Thr145Pro	MSMEG_RS25455		cysteine dioxygenase family protein
NC_008596	5412496	snp	G	T	#NAME?	T:16 G:114
NC_008596	5422697	snp	C	G	#NAME?	G:14 C:92	CDS	-	628/642	210/213	missense_variant c.628G>C p.Ala210Pro	MSMEG_RS25715		transporter
NC_008596	5422713	snp	T	G	#NAME?	G:23 T:83	CDS	-	612/642	204/213	synonymous_variant c.612A>C p.Pro204Pro	MSMEG_RS25715		transporter
NC_008596	5437949	snp	G	C	#NAME?	C:11 G:54
NC_008596	5540629	snp	A	C	#NAME?	C:14 A:110
NC_008596	5558777	snp	C	G	#NAME?	G:14 C:118
NC_008596	5567773	snp	A	C	#NAME?	C:17 A:139	CDS	-	69/1335	23/444	synonymous_variant c.69T>G p.Gly23Gly	MSMEG_RS26430		trypsin-like peptidase domain-containing protein
NC_008596	5584344	complex	CTA	GCGT	#NAME?	GCGT:60 CTA:0
NC_008596	5693399	complex,complex	TGTGCCGTGGC	AGCGGCGGGGG,AGCGCCGTGGC	#NAME?	AGCGGCGGGGG,AGCGCCGTGGC:11,23 TGTGCCGTGGC:0
NC_008596	5693432	complex	G	CGGC	#NAME?	CGGC:20 G:0
NC_008596	5736200	snp	G	C	#NAME?	C:13 G:106
NC_008596	5755590	snp	T	G	#NAME?	G:16 T:71	CDS	+	140/711	47/236	missense_variant c.140T>G p.Leu47Arg	MSMEG_RS27290	prrA	two-component system response regulator PrrA
NC_008596	5755595	snp	A	C	#NAME?	C:19 A:66	CDS	+	145/711	49/236	missense_variant c.145A>C p.Ser49Arg	MSMEG_RS27290	prrA	two-component system response regulator PrrA
NC_008596	5755617	snp	A	C	#NAME?	C:12 A:106	CDS	+	167/711	56/236	missense_variant c.167A>C p.Asp56Ala	MSMEG_RS27290	prrA	two-component system response regulator PrrA
NC_008596	5803110	complex	GTC	TTA	#NAME?	TTA:7 GTC:50
NC_008596	5803120	snp	A	C	#NAME?	C:8 A:66
NC_008596	5803135	snp	G	T	#NAME?	T:8 G:58
NC_008596	5812445	snp	C	G	#NAME?	G:7 C:33
NC_008596	5890307	snp	T	G	#NAME?	G:17 T:124	CDS	-	1549/2298	517/765	missense_variant c.1549A>C p.Thr517Pro	MSMEG_RS28065	purL	phosphoribosylformylglycinamidine synthase subunit PurL
NC_008596	5917588	snp	A	T	#NAME?	T:11 A:87	CDS	+	72/894	24/297	synonymous_variant c.72A>T p.Ala24Ala	MSMEG_RS28200		hypothetical protein
NC_008596	5950165	snp	A	C	#NAME?	C:9 A:52
NC_008596	5950168	snp	G	C	#NAME?	C:7 G:58
NC_008596	5950170	snp	G	T	#NAME?	T:11 G:55
NC_008596	5950176	snp	C	A	#NAME?	A:12 C:63
NC_008596	5953995	snp,snp	T	A,G	#NAME?	A,G:7,9 T:96	CDS	-	100/633	34/210	missense_variant c.100A>T p.Arg34Trp	MSMEG_RS28410		hypothetical protein
NC_008596	5954026	complex,snp	TGC	GGG,GGC	#NAME?	GGG,GGC:10,9 TGC:61	CDS	-	69/633	23/210	missense_variant c.67_69delGCAinsCCC p.Ala23Pro	MSMEG_RS28410		hypothetical protein
NC_008596	5990232	snp	C	G	#NAME?	G:26 C:53	CDS	-	850/1143	284/380	missense_variant c.850G>C p.Asp284His	MSMEG_RS28585		sulfotransferase
NC_008596	5990239	snp	G	T	#NAME?	T:12 G:35	CDS	-	843/1143	281/380	synonymous_variant c.843C>A p.Ile281Ile	MSMEG_RS28585		sulfotransferase
NC_008596	5990241	snp	T	G	#NAME?	G:6 T:43	CDS	-	841/1143	281/380	missense_variant c.841A>C p.Ile281Leu	MSMEG_RS28585		sulfotransferase
NC_008596	5990243	snp	T	G	#NAME?	G:9 T:29	CDS	-	839/1143	280/380	missense_variant c.839A>C p.Gln280Pro	MSMEG_RS28585		sulfotransferase
NC_008596	6008846	snp	G	T	#NAME?	T:16 G:101	CDS	-	669/1320	223/439	missense_variant c.669C>A p.Phe223Leu	MSMEG_RS28665		oligosaccharide flippase family protein
NC_008596	6072293	snp	T	A	#NAME?	A:9 T:73
NC_008596	6072308	snp	G	T	#NAME?	T:12 G:79
NC_008596	6084343	snp	C	A	#NAME?	A:14 C:107	CDS	-	612/780	204/259	missense_variant c.612G>T p.Met204Ile	MSMEG_RS29020		sugar ABC transporter ATP-binding protein
NC_008596	6134223	snp,snp	G	C,T	#NAME?	C,T:9,13 G:93	CDS	+	430/1200	144/399	stop_gained c.430G>T p.Glu144*	MSMEG_RS29270		GTP-binding protein
NC_008596	6135889	snp	T	G	#NAME?	G:16 T:70	CDS	+	629/945	210/314	missense_variant c.629T>G p.Leu210Arg	MSMEG_RS29280		MBL fold metallo-hydrolase
NC_008596	6135898	snp	A	C	#NAME?	C:14 A:71	CDS	+	638/945	213/314	missense_variant c.638A>C p.Gln213Pro	MSMEG_RS29280		MBL fold metallo-hydrolase
NC_008596	6162576	snp	C	G	#NAME?	G:13 C:105	CDS	-	936/1620	312/539	synonymous_variant c.936G>C p.Pro312Pro	MSMEG_RS29420		hypothetical protein
NC_008596	6162633	snp	A	T	#NAME?	T:14 A:99	CDS	-	879/1620	293/539	synonymous_variant c.879T>A p.Pro293Pro	MSMEG_RS29420		hypothetical protein
NC_008596	6250534	snp,snp	C	A,G	#NAME?	A,G:6,6 C:98
NC_008596	6250543	snp,snp	C	A,G	#NAME?	A,G:7,8 C:99
NC_008596	6250550	snp	C	A	#NAME?	A:13 C:101
NC_008596	6336512	snp	C	G	#NAME?	G:12 C:53
NC_008596	6336541	complex	TC	GT	#NAME?	GT:53 TC:0
NC_008596	6426616	snp,snp	C	A,G	#NAME?	A,G:24,6 C:86	CDS	+	1332/1410	444/469	missense_variant c.1332C>A p.Phe444Leu	MSMEG_RS30730		PLP-dependent aminotransferase family protein
NC_008596	6443046	snp	A	T	#NAME?	T:13 A:116	CDS	+	991/1851	331/616	missense_variant c.991A>T p.Met331Leu	MSMEG_RS30805		arabinofuranosyltransferase
NC_008596	6443061	snp	T	G	#NAME?	G:13 T:108	CDS	+	1006/1851	336/616	missense_variant c.1006T>G p.Trp336Gly	MSMEG_RS30805		arabinofuranosyltransferase
NC_008596	6443071	snp	T	G	#NAME?	G:17 T:102	CDS	+	1016/1851	339/616	missense_variant c.1016T>G p.Val339Gly	MSMEG_RS30805		arabinofuranosyltransferase
NC_008596	6467047	complex	TCGA	CTGACG	#NAME?	CTGACG:28 TCGA:0
NC_008596	6501295	snp	T	G	#NAME?	G:13 T:110
NC_008596	6610623	snp,snp	T	A,G	#NAME?	A,G:9,10 T:115	CDS	-	842/2583	281/860	missense_variant c.842A>T p.Gln281Leu	MSMEG_RS31605		ATP-binding cassette domain-containing protein
NC_008596	6619881	complex,snp	CGGGT	GGGGG,CGGGG	#NAME?	GGGGG,CGGGG:6,17 CGGGT:69	CDS	+	47/570	16/189	missense_variant c.47T>G p.Val16Gly	MSMEG_RS31655		TetR/AcrR family transcriptional regulator
NC_008596	6681588	snp	T	A	#NAME?	A:12 T:94	CDS	-	431/900	144/299	missense_variant c.431A>T p.Glu144Val	MSMEG_RS31970	mdcH	malonate decarboxylase subunit epsilon
NC_008596	6681614	snp	T	G	#NAME?	G:12 T:100	CDS	-	405/900	135/299	missense_variant c.405A>C p.Gln135His	MSMEG_RS31970	mdcH	malonate decarboxylase subunit epsilon
NC_008596	6687505	ins	C	CCG	#NAME?	CCG:42 C:0
NC_008596	6687516	snp	C	G	#NAME?	G:7 C:25
NC_008596	6715799	snp	T	G	#NAME?	G:13 T:102	CDS	+	1370/1437	457/478	missense_variant c.1370T>G p.Leu457Arg	MSMEG_RS32105		cytosine permease
NC_008596	6726701	snp	G	C	#NAME?	C:14 G:109	CDS	+	460/1470	154/489	missense_variant c.460G>C p.Val154Leu	MSMEG_RS32170		amidase
NC_008596	6773693	snp,snp	A	C,T	#NAME?	C,T:8,9 A:128	CDS	-	197/630	66/209	missense_variant c.197T>G p.Leu66Arg	MSMEG_RS32415		ABC transporter permease
NC_008596	6778440	complex,complex	GACCCA	CCCCCC,CGCCCC	#NAME?	CCCCCC,CGCCCC:18,6 GACCCA:74
NC_008596	6778451	snp	T	C	#NAME?	C:14 T:84
NC_008596	6778456	snp	G	C	#NAME?	C:15 G:82
NC_008596	6802813	snp	C	A	#NAME?	A:12 C:87
NC_008596	6825430	snp,snp	G	C,T	#NAME?	C,T:7,8 G:118	CDS	+	1339/1356	447/451	stop_gained c.1339G>T p.Glu447*	MSMEG_RS32660		MHS family MFS transporter
NC_008596	6825446	snp,snp	G	C,T	#NAME?	C,T:7,8 G:118	CDS	+	1355/1356	452/451	stop_lost&splice_region_variant c.1355G>C p.Ter452Serext*?	MSMEG_RS32660		MHS family MFS transporter
NC_008596	6923228	snp	A	C	#NAME?	C:16 A:118	CDS	-	829/1503	277/500	missense_variant c.829T>G p.Phe277Val	MSMEG_RS33145		aldehyde dehydrogenase
NC_008596	6923327	complex,snp,snp	CGGT	GGGG,GGGT,CGGG	#NAME?	GGGG,GGGT,CGGG:20,7,8 CGGT:98	CDS	-	730/1503	244/500	missense_variant c.730G>C p.Ala244Pro	MSMEG_RS33145		aldehyde dehydrogenase
NC_008596	6963096	snp	C	G	#NAME?	G:13 C:103
NC_008596	6963111	snp	A	C	#NAME?	C:15 A:66
NC_008596	6963116	snp	C	G	#NAME?	G:12 C:72
NC_008596	6971533	snp	T	G	#NAME?	G:16 T:107	CDS	+	2138/2403	713/800	missense_variant c.2138T>G p.Leu713Arg	MSMEG_RS33380		hypothetical protein
NC_008596	6981589	snp	C	A	#NAME?	A:15 C:124	CDS	-	99/1056	33/351	synonymous_variant c.99G>T p.Pro33Pro	MSMEG_RS33420		ParB/RepB/Spo0J family partition protein

## Sheet: CCP-MIX
The analysis of M. smegmatis CCP mutant growing in the presence of CHP
CHROM	POS	TYPE	REF	ALT	variants	EVIDENCE	FTYPE	STRAND	NT_POS	AA_POS	EFFECT	LOCUS_TAG	GENE	PRODUCT
NC_008596	62769	snp,snp	T	A,G	#NAME?	A,G:6,7 T:106	CDS	+	1300/2079	434/692	missense_variant c.1300T>A p.Ser434Thr	MSMEG_RS00210		hypothetical protein
NC_008596	64992	snp	T	G	#NAME?	G:11 T:33	CDS	+	1448/2469	483/822	missense_variant c.1448T>G p.Val483Gly	MSMEG_RS00215		hypothetical protein
NC_008596	65016	snp	T	G	#NAME?	G:8 T:58	CDS	+	1472/2469	491/822	missense_variant c.1472T>G p.Leu491Arg	MSMEG_RS00215		hypothetical protein
NC_008596	65025	snp	T	G	#NAME?	G:9 T:64	CDS	+	1481/2469	494/822	missense_variant c.1481T>G p.Val494Gly	MSMEG_RS00215		hypothetical protein
NC_008596	71211	snp	G	C	#NAME?	C:10 G:52	CDS	+	301/780	101/259	missense_variant c.301G>C p.Glu101Gln	MSMEG_RS00250		helix-turn-helix domain-containing protein
NC_008596	71212	snp	A	C	#NAME?	C:12 A:52	CDS	+	302/780	101/259	missense_variant c.302A>C p.Glu101Ala	MSMEG_RS00250		helix-turn-helix domain-containing protein
NC_008596	71216	snp	G	C	#NAME?	C:10 G:54	CDS	+	306/780	102/259	synonymous_variant c.306G>C p.Pro102Pro	MSMEG_RS00250		helix-turn-helix domain-containing protein
NC_008596	83630	snp	A	C	#NAME?	C:12 A:76	CDS	+	313/1782	105/593	missense_variant c.313A>C p.Thr105Pro	MSMEG_RS00300	eccCb	type VII secretion protein EccCb
NC_008596	83634	snp	A	C	#NAME?	C:10 A:76	CDS	+	317/1782	106/593	missense_variant c.317A>C p.His106Pro	MSMEG_RS00300	eccCb	type VII secretion protein EccCb
NC_008596	115554	snp	T	G	#NAME?	G:14 T:80	CDS	-	1041/2148	347/715	synonymous_variant c.1041A>C p.Ala347Ala	MSMEG_RS00445		FUSC family protein
NC_008596	136808	snp	G	T	#NAME?	T:14 G:113
NC_008596	221832	snp	T	A	#NAME?	A:15 T:101	CDS	+	590/897	197/298	missense_variant c.590T>A p.Leu197His	MSMEG_RS00965		TIGR03619 family F420-dependent LLM class oxidoreductase
NC_008596	308617	snp	T	G	#NAME?	G:6 T:45	CDS	-	485/1584	162/527	missense_variant c.485A>C p.Glu162Ala	MSMEG_RS01360		aldehyde dehydrogenase family protein
NC_008596	308638	snp	T	G	#NAME?	G:10 T:39	CDS	-	464/1584	155/527	missense_variant c.464A>C p.Glu155Ala	MSMEG_RS01360		aldehyde dehydrogenase family protein
NC_008596	308644	snp	G	T	#NAME?	T:8 G:37	CDS	-	458/1584	153/527	stop_gained c.458C>A p.Ser153*	MSMEG_RS01360		aldehyde dehydrogenase family protein
NC_008596	312167	snp,snp	T	A,G	#NAME?	A,G:6,8 T:38	CDS	+	52/213	18/70	missense_variant c.52T>A p.Phe18Ile	MSMEG_RS01375		hypothetical protein
NC_008596	313842	snp	T	G	#NAME?	G:9 T:67	CDS	+	494/1572	165/523	missense_variant c.494T>G p.Val165Gly	MSMEG_RS01385		GMC family oxidoreductase
NC_008596	366288	snp	A	C	#NAME?	C:10 A:71	CDS	-	698/1188	233/395	missense_variant c.698T>G p.Leu233Arg	MSMEG_RS01625		GAF domain-containing protein
NC_008596	368410	snp	A	T	#NAME?	T:8 A:68	CDS	+	188/936	63/311	missense_variant c.188A>T p.Gln63Leu	MSMEG_RS01635		nitronate monooxygenase
NC_008596	397745	snp	A	C	#NAME?	C:12 A:86	CDS	-	3391/4245	1131/1414	missense_variant c.3391T>G p.Cys1131Gly	MSMEG_RS01770		DUF3367 domain-containing protein
NC_008596	417993	snp,snp	C	A,G	#NAME?	A,G:7,8 C:101
NC_008596	418001	snp,snp	C	A,G	#NAME?	A,G:10,7 C:97
NC_008596	468375	snp	G	T	#NAME?	T:12 G:103	CDS	+	1153/1176	385/391	missense_variant c.1153G>T p.Asp385Tyr	MSMEG_RS01990		RNA polymerase sigma24 factor
NC_008596	508337	snp,snp	T	A,G	#NAME?	A,G:6,7 T:65	CDS	-	320/1158	107/385	missense_variant c.320A>T p.Lys107Met	MSMEG_RS02115		uroporphyrinogen-III synthase
NC_008596	582979	snp	T	A	#NAME?	A:12 T:86	CDS	-	275/777	92/258	missense_variant c.275A>T p.Glu92Val	MSMEG_RS02445		DeoR/GlpR transcriptional regulator
NC_008596	615363	snp	T	G	#NAME?	G:13 T:83	CDS	-	442/1254	148/417	missense_variant c.442A>C p.Ser148Arg	MSMEG_RS02595		MFS transporter
NC_008596	663949	snp,snp	C	A,G	#NAME?	A,G:6,8 C:98	CDS	+	360/1332	120/443	synonymous_variant c.360C>A p.Val120Val	MSMEG_RS02855		MFS transporter
NC_008596	678607	snp	C	A	#NAME?	A:9 C:70
NC_008596	725019	complex,snp	CGGT	GGGG,CGGG	#NAME?	GGGG,CGGG:9,9 CGGT:77	CDS	-	49/1011	17/336	missense_variant c.49A>C p.Thr17Pro	MSMEG_RS03125		ABC transporter permease
NC_008596	765854	snp	T	G	#NAME?	G:11 T:90	CDS	+	337/753	113/250	missense_variant c.337T>G p.Trp113Gly	MSMEG_RS03325		maleylpyruvate isomerase family mycothiol-dependent enzyme
NC_008596	783293	snp	A	C	#NAME?	C:10 A:43
NC_008596	783297	snp,snp	G	C,T	#NAME?	C,T:8,11 G:30
NC_008596	783299	snp,snp	A	C,T	#NAME?	C,T:7,9 A:33
NC_008596	783301	snp	T	G	#NAME?	G:7 T:45
NC_008596	906668	snp,snp	T	A,G	#NAME?	A,G:10,6 T:87	CDS	+	527/1464	176/487	missense_variant c.527T>A p.Leu176Gln	MSMEG_RS03995		amidase
NC_008596	967188	snp	T	G	#NAME?	G:8 T:68
NC_008596	967694	snp	T	G	#NAME?	G:9 T:72	CDS	+	392/834	131/277	missense_variant c.392T>G p.Leu131Arg	MSMEG_RS04295		DUF559 domain-containing protein
NC_008596	971953	snp,snp	A	C,T	#NAME?	C,T:6,7 A:62	CDS	-	858/1491	286/496	synonymous_variant c.858T>G p.Pro286Pro	MSMEG_RS04320		serine/threonine protein kinase
NC_008596	1037679	snp	G	T	#NAME?	T:12 G:99	CDS	+	158/243	53/80	missense_variant c.158G>T p.Gly53Val	MSMEG_RS04690		hypothetical protein
NC_008596	1153745	snp	T	C	#NAME?	C:8 T:67	CDS	+	845/1401	282/466	missense_variant c.845T>C p.Ile282Thr	MSMEG_RS05295		amidase
NC_008596	1153750	snp	A	C	#NAME?	C:10 A:65	CDS	+	850/1401	284/466	missense_variant c.850A>C p.Thr284Pro	MSMEG_RS05295		amidase
NC_008596	1153756	snp,snp	G	C,T	#NAME?	C,T:6,9 G:61	CDS	+	856/1401	286/466	stop_gained c.856G>T p.Glu286*	MSMEG_RS05295		amidase
NC_008596	1189084	snp	G	T	#NAME?	T:12 G:102	CDS	+	205/597	69/198	missense_variant c.205G>T p.Asp69Tyr	MSMEG_RS05485		membrane protein
NC_008596	1203601	snp	A	T	#NAME?	T:11 A:93	CDS	+	311/870	104/289	missense_variant c.311A>T p.Gln104Leu	MSMEG_RS05560		ABC transporter permease
NC_008596	1271992	snp	G	C	#NAME?	C:14 G:90
NC_008596	1294890	snp	A	C	#NAME?	C:11 A:58	CDS	-	993/1293	331/430	synonymous_variant c.993T>G p.Arg331Arg	MSMEG_RS05985		DUF2786 domain-containing protein
NC_008596	1321712	snp	C	A	#NAME?	A:17 C:63	CDS	+	482/1437	161/478	stop_gained c.482C>A p.Ser161*	MSMEG_RS06090		DNA phosphorothioation-associated putative methyltransferase
NC_008596	1331262	snp	C	A	#NAME?	A:11 C:88	CDS	+	3720/6366	1240/2121	missense_variant c.3720C>A p.Phe1240Leu	MSMEG_RS06115		DUF3320 domain-containing protein
NC_008596	1395245	snp	G	T	#NAME?	T:9 G:69
NC_008596	1503294	snp	A	C	#NAME?	C:9 A:62	CDS	+	454/918	152/305	missense_variant c.454A>C p.Thr152Pro	MSMEG_RS06850		hypothetical protein
NC_008596	1519628	snp	C	A	#NAME?	A:9 C:53
NC_008596	1519630	snp	C	A	#NAME?	A:12 C:48
NC_008596	1574107	snp	A	C	#NAME?	C:8 A:44	CDS	-	65/915	22/304	missense_variant c.65T>G p.Val22Gly	MSMEG_RS07235		class I SAM-dependent methyltransferase
NC_008596	1641094	complex,snp	AGGT	TGGG,TGGT	#NAME?	TGGG,TGGT:7,6 AGGT:53	CDS	+	173/342	58/113	missense_variant c.173A>T p.Gln58Leu	MSMEG_RS07575		pduH protein
NC_008596	1641103	snp	T	G	#NAME?	G:20 T:70	CDS	+	182/342	61/113	missense_variant c.182T>G p.Val61Gly	MSMEG_RS07575		pduH protein
NC_008596	1645130	snp	C	A	#NAME?	A:9 C:78
NC_008596	1686818	snp	A	C	#NAME?	C:12 A:92	CDS	+	964/1200	322/399	missense_variant c.964A>C p.Thr322Pro	MSMEG_RS07815		hypothetical protein
NC_008596	1696117	snp,snp	C	A,G	#NAME?	A,G:11,6 C:95	CDS	-	1351/2361	451/786	stop_gained c.1351G>T p.Glu451*	MSMEG_RS07855		glycoside hydrolase family 65 protein
NC_008596	1719222	snp	G	T	#NAME?	T:6 G:49
NC_008596	1782007	snp,snp	A	C,G	#NAME?	C,G:6,14 A:85	CDS	-	314/633	105/210	missense_variant c.314T>G p.Leu105Arg	MSMEG_RS08245		sigma-70 family RNA polymerase sigma factor
NC_008596	1863927	snp	T	G	#NAME?	G:12 T:101	CDS	-	600/930	200/309	missense_variant c.600A>C p.Glu200Asp	MSMEG_RS08635		ribonuclease Z
NC_008596	1863968	snp	C	A	#NAME?	A:16 C:92	CDS	-	559/930	187/309	missense_variant c.559G>T p.Asp187Tyr	MSMEG_RS08635		ribonuclease Z
NC_008596	1865097	snp	T	G	#NAME?	G:10 T:50	CDS	-	230/342	77/113	missense_variant c.230A>C p.His77Pro	MSMEG_RS08645		hypothetical protein
NC_008596	1865107	snp	G	C	#NAME?	C:10 G:57	CDS	-	220/342	74/113	missense_variant c.220C>G p.Arg74Gly	MSMEG_RS08645		hypothetical protein
NC_008596	1904763	snp	T	G	#NAME?	G:10 T:70	CDS	-	391/1365	131/454	missense_variant c.391A>C p.Ser131Arg	MSMEG_RS08885		coenzyme F420-0:L-glutamate ligase
NC_008596	1904768	snp	T	G	#NAME?	G:12 T:68	CDS	-	386/1365	129/454	missense_variant c.386A>C p.Asp129Ala	MSMEG_RS08885		coenzyme F420-0:L-glutamate ligase
NC_008596	2040161	snp,snp	C	A,G	#NAME?	A,G:17,7 C:75
NC_008596	2117025	snp	T	G	#NAME?	G:23 T:0	CDS	+	946/1560	316/519	missense_variant c.946T>G p.Phe316Val	MSMEG_RS09890		NAD(P)/FAD-dependent oxidoreductase
NC_008596	2168921	snp	C	A	#NAME?	A:11 C:57	CDS	+	882/1104	294/367	missense_variant c.882C>A p.Phe294Leu	MSMEG_RS10155		P1 family peptidase
NC_008596	2223899	snp	A	C	#NAME?	C:11 A:74	CDS	+	1113/1590	371/529	synonymous_variant c.1113A>C p.Pro371Pro	MSMEG_RS10425		HNH endonuclease
NC_008596	2287386	snp	C	A	#NAME?	A:11 C:92	CDS	+	195/1218	65/405	synonymous_variant c.195C>A p.Ile65Ile	MSMEG_RS10710		acetyl-CoA C-acetyltransferase
NC_008596	2320374	snp	C	A	#NAME?	A:14 C:93	CDS	-	730/741	244/246	stop_gained c.730G>T p.Glu244*	MSMEG_RS10855		TetR family transcriptional regulator
NC_008596	2363171	snp	C	G	#NAME?	G:7 C:38
NC_008596	2363177	snp	C	G	#NAME?	G:12 C:27
NC_008596	2434415	snp	T	G	#NAME?	G:9 T:59
NC_008596	2434428	snp	T	G	#NAME?	G:9 T:71
NC_008596	2480408	snp,snp	A	C,T	#NAME?	C,T:9,9 A:73
NC_008596	2495335	snp,snp	T	A,G	#NAME?	A,G:6,10 T:68	CDS	+	2275/3384	759/1127	missense_variant c.2275T>A p.Ser759Thr	MSMEG_RS11690		pyruvate carboxylase
NC_008596	2518694	snp	C	A	#NAME?	A:11 C:73	CDS	-	402/891	134/296	synonymous_variant c.402G>T p.Ala134Ala	MSMEG_RS11795		D-alanyl-D-alanine carboxypeptidase
NC_008596	2584889	snp	A	C	#NAME?	C:11 A:89	CDS	+	202/1224	68/407	missense_variant c.202A>C p.Thr68Pro	MSMEG_RS12120		lipase
NC_008596	2680132	snp	T	A	#NAME?	A:7 T:51	CDS	+	163/1356	55/451	missense_variant c.163T>A p.Phe55Ile	MSMEG_RS12600		aldehyde dehydrogenase
NC_008596	2680134	snp	C	A	#NAME?	A:8 C:53	CDS	+	165/1356	55/451	missense_variant c.165C>A p.Phe55Leu	MSMEG_RS12600		aldehyde dehydrogenase
NC_008596	2701244	snp	G	T	#NAME?	T:10 G:89	CDS	+	841/1548	281/515	stop_gained c.841G>T p.Glu281*	MSMEG_RS12710		MFS transporter
NC_008596	2780650	snp	G	T	#NAME?	T:9 G:75	CDS	-	579/729	193/242	synonymous_variant c.579C>A p.Ile193Ile	MSMEG_RS13140		hypothetical protein
NC_008596	2803654	snp	T	G	#NAME?	G:12 T:52	CDS	+	156/876	52/291	synonymous_variant c.156T>G p.Gly52Gly	MSMEG_RS13260		diaminopimelate epimerase
NC_008596	2812224	snp	C	G	#NAME?	G:16 C:15	CDS	+	2033/2436	678/811	missense_variant c.2033C>G p.Ala678Gly	MSMEG_RS13280		hypothetical protein
NC_008596	2822088	snp,snp	G	C,T	#NAME?	C,T:6,7 G:89
NC_008596	2833983	snp	G	T	#NAME?	T:11 G:93	CDS	+	207/744	69/247	synonymous_variant c.207G>T p.Leu69Leu	MSMEG_RS13415		DUF3159 domain-containing protein
NC_008596	2838795	snp	C	A	#NAME?	A:13 C:71	CDS	+	801/1194	267/397	missense_variant c.801C>A p.Phe267Leu	MSMEG_RS13435		class I SAM-dependent RNA methyltransferase
NC_008596	2880366	snp	C	G	#NAME?	G:7 C:29	CDS	+	159/297	53/98	synonymous_variant c.159C>G p.Gly53Gly	MSMEG_RS13655		ABC transporter ATP-binding protein
NC_008596	2946514	snp	C	G	#NAME?	G:7 C:53	CDS	-	499/1584	167/527	missense_variant c.499G>C p.Ala167Pro	MSMEG_RS13985		acyl-CoA synthetase
NC_008596	2998765	snp	A	C	#NAME?	C:8 A:70	CDS	+	185/1056	62/351	missense_variant c.185A>C p.Asp62Ala	MSMEG_RS14255		NUDIX domain-containing protein
NC_008596	3023679	snp	G	C	#NAME?	C:8 G:60	CDS	+	549/1863	183/620	synonymous_variant c.549G>C p.Pro183Pro	MSMEG_RS14380	secD	protein translocase subunit SecD
NC_008596	3074729	snp	T	A	#NAME?	A:9 T:77	CDS	-	1424/1506	475/501	missense_variant c.1424A>T p.Glu475Val	MSMEG_RS14605		NAD-dependent succinate-semialdehyde dehydrogenase
NC_008596	3105783	complex	T	GTG	#NAME?	GTG:11 T:0	CDS	+	1066/1134	356/377	frameshift_variant&missense_variant c.1066delTinsGTG p.Cys356fs	MSMEG_RS14730		3-dehydroquinate synthase
NC_008596	3105805	snp	T	C	#NAME?	C:22 T:0	CDS	+	1088/1134	363/377	missense_variant c.1088T>C p.Leu363Pro	MSMEG_RS14730		3-dehydroquinate synthase
NC_008596	3109206	ins	A	ACG	#NAME?	ACG:32 A:0	CDS	+	337/2620	113/872	frameshift_variant c.336_337insGC p.Pro113fs	MSMEG_RS14755		helix-turn-helix transcriptional regulator
NC_008596	3146616	snp	G	T	#NAME?	T:15 G:84	CDS	+	1158/1320	386/439	synonymous_variant c.1158G>T p.Ala386Ala	MSMEG_RS14920		bifunctional 3,4-dihydroxy-2-butanone-4-phosphate synthase/GTP cyclohydrolase II
NC_008596	3150063	snp	A	C	#NAME?	C:15 A:71	CDS	-	64/1911	22/636	missense_variant c.64T>G p.Cys22Gly	MSMEG_RS14940	ggt	gamma-glutamyltransferase
NC_008596	3178930	snp	A	C	#NAME?	C:10 A:84	CDS	-	688/2091	230/696	missense_variant c.688T>G p.Tyr230Asp	MSMEG_RS15070		transketolase
NC_008596	3269577	snp	C	G	#NAME?	G:11 C:48
NC_008596	3287414	snp	A	C	#NAME?	C:11 A:83	CDS	+	125/618	42/205	missense_variant c.125A>C p.Asp42Ala	MSMEG_RS15580	hisH	imidazole glycerol phosphate synthase subunit HisH
NC_008596	3301339	snp	G	T	#NAME?	T:7 G:55	CDS	+	1381/1851	461/616	stop_gained c.1381G>T p.Glu461*	MSMEG_RS15650		prolipoprotein diacylglyceryl transferase
NC_008596	3328242	complex	GCCCT	CC	#NAME?	CC:22 GCCCT:0	CDS	+	677/954	226/317	missense_variant&conservative_inframe_deletion c.677_681delGCCCTinsCC p.Gly226_Pro227delinsAla	MSMEG_RS15765		hypothetical protein
NC_008596	3336232	snp	T	G	#NAME?	G:7 T:50
NC_008596	3444518	snp,snp	G	C,T	#NAME?	C,T:6,7 G:88	CDS	-	1090/1104	364/367	missense_variant c.1090C>G p.Pro364Ala	MSMEG_RS16405		DUF2236 domain-containing protein
NC_008596	3444557	snp	A	C	#NAME?	C:12 A:66	CDS	-	1051/1104	351/367	missense_variant c.1051T>G p.Trp351Gly	MSMEG_RS16405		DUF2236 domain-containing protein
NC_008596	3492963	snp	G	C	#NAME?	C:8 G:63	CDS	-	426/1425	142/474	synonymous_variant c.426C>G p.Ala142Ala	MSMEG_RS16640		MHS family MFS transporter
NC_008596	3529198	snp	G	C	#NAME?	C:10 G:81
NC_008596	3541032	snp	A	C	#NAME?	C:8 A:68
NC_008596	3564383	snp	G	C	#NAME?	C:13 G:89	CDS	+	585/603	195/200	synonymous_variant c.585G>C p.Pro195Pro	MSMEG_RS17000		hypothetical protein
NC_008596	3564391	snp,snp	T	A,G	#NAME?	A,G:7,9 T:75	CDS	+	593/603	198/200	missense_variant c.593T>A p.Leu198His	MSMEG_RS17000		hypothetical protein
NC_008596	3569102	snp	T	G	#NAME?	G:8 T:51	CDS	+	531/1398	177/465	synonymous_variant c.531T>G p.Gly177Gly	MSMEG_RS17030		aspartate aminotransferase family protein
NC_008596	3592484	snp	T	G	#NAME?	G:8 T:70	CDS	-	1313/1431	438/476	missense_variant c.1313A>C p.Glu438Ala	MSMEG_RS17155		hypothetical protein
NC_008596	3599796	snp	T	G	#NAME?	G:13 T:78	CDS	+	1605/1875	535/624	synonymous_variant c.1605T>G p.Gly535Gly	MSMEG_RS17180		MFS transporter
NC_008596	3604374	snp	G	C	#NAME?	C:9 G:51
NC_008596	3630131	snp	T	G	#NAME?	G:9 T:67	CDS	+	760/2055	254/684	missense_variant c.760T>G p.Ser254Ala	MSMEG_RS17340		FUSC family protein
NC_008596	3630144	snp	A	C	#NAME?	C:9 A:68	CDS	+	773/2055	258/684	missense_variant c.773A>C p.Glu258Ala	MSMEG_RS17340		FUSC family protein
NC_008596	3630153	snp	C	A	#NAME?	A:8 C:67	CDS	+	782/2055	261/684	stop_gained c.782C>A p.Ser261*	MSMEG_RS17340		FUSC family protein
NC_008596	3639877	snp	C	A	#NAME?	A:11 C:83	CDS	+	1800/2079	600/692	missense_variant c.1800C>A p.Phe600Leu	MSMEG_RS17380		HAMP domain-containing protein
NC_008596	3665730	snp	T	G	#NAME?	G:7 T:46	CDS	-	1159/1539	387/512	missense_variant c.1159A>C p.Ser387Arg	MSMEG_RS17485		sugar ABC transporter ATP-binding protein
NC_008596	3665735	snp	A	C	#NAME?	C:10 A:40	CDS	-	1154/1539	385/512	missense_variant c.1154T>G p.Leu385Arg	MSMEG_RS17485		sugar ABC transporter ATP-binding protein
NC_008596	3665764	snp	G	C	#NAME?	C:11 G:75	CDS	-	1125/1539	375/512	synonymous_variant c.1125C>G p.Ala375Ala	MSMEG_RS17485		sugar ABC transporter ATP-binding protein
NC_008596	3777630	snp	T	G	#NAME?	G:7 T:61	CDS	+	448/651	150/216	missense_variant c.448T>G p.Leu150Val	MSMEG_RS18015		hypothetical protein
NC_008596	3837505	snp	A	C	#NAME?	C:9 A:48	CDS	-	389/1410	130/469	missense_variant c.389T>G p.Val130Gly	MSMEG_RS18270	argH	argininosuccinate lyase
NC_008596	3837511	snp	T	G	#NAME?	G:11 T:43	CDS	-	383/1410	128/469	missense_variant c.383A>C p.Asp128Ala	MSMEG_RS18270	argH	argininosuccinate lyase
NC_008596	3873593	snp	C	G	#NAME?	G:18 C:25
NC_008596	3916397	snp	C	G	#NAME?	G:6 C:15
NC_008596	3954290	snp,snp	A	C,T	#NAME?	C,T:7,6 A:80	CDS	-	227/405	76/134	missense_variant c.227T>G p.Leu76Arg	MSMEG_RS18820		VOC family protein
NC_008596	3964852	snp	T	A	#NAME?	A:10 T:75	CDS	+	863/882	288/293	missense_variant c.863T>A p.Leu288His	MSMEG_RS18865		alpha/beta hydrolase
NC_008596	4136349	snp	G	C	#NAME?	C:10 G:71
NC_008596	4136354	snp,snp	T	A,G	#NAME?	A,G:7,14 T:63
NC_008596	4247247	snp	T	A	#NAME?	A:10 T:54	CDS	-	1124/1590	375/529	missense_variant c.1124A>T p.Glu375Val	MSMEG_RS20165		propionate CoA-transferase
NC_008596	4247258	snp	G	C	#NAME?	C:8 G:61	CDS	-	1113/1590	371/529	synonymous_variant c.1113C>G p.Leu371Leu	MSMEG_RS20165		propionate CoA-transferase
NC_008596	4302967	snp,snp	A	C,T	#NAME?	C,T:7,7 A:48	CDS	-	677/714	226/237	missense_variant c.677T>G p.Leu226Arg	MSMEG_RS20430	pgeF	peptidoglycan editing factor PgeF
NC_008596	4302977	snp	T	G	#NAME?	G:10 T:61	CDS	-	667/714	223/237	missense_variant c.667A>C p.Thr223Pro	MSMEG_RS20430	pgeF	peptidoglycan editing factor PgeF
NC_008596	4302985	snp	T	G	#NAME?	G:8 T:60	CDS	-	659/714	220/237	missense_variant c.659A>C p.Gln220Pro	MSMEG_RS20430	pgeF	peptidoglycan editing factor PgeF
NC_008596	4383346	snp	C	G	#NAME?	G:11 C:63	CDS	-	91/1503	31/500	missense_variant c.91G>C p.Ala31Pro	MSMEG_RS20790		alpha/beta hydrolase
NC_008596	4429154	snp	T	G	#NAME?	G:9 T:75	CDS	+	476/1092	159/363	missense_variant c.476T>G p.Leu159Arg	MSMEG_RS21015		S-(hydroxymethyl)mycothiol dehydrogenase
NC_008596	4631152	snp	C	G	#NAME?	G:10 C:58	CDS	+	380/1620	127/539	missense_variant c.380C>G p.Ala127Gly	MSMEG_RS21925		ABC transporter ATP-binding protein
NC_008596	4631155	snp	G	C	#NAME?	C:8 G:50	CDS	+	383/1620	128/539	missense_variant c.383G>C p.Arg128Pro	MSMEG_RS21925		ABC transporter ATP-binding protein
NC_008596	4654610	snp	A	C	#NAME?	C:9 A:69	CDS	+	83/248	28/81	missense_variant c.83A>C p.His28Pro	MSMEG_RS22030		hypothetical protein
NC_008596	4667480	snp	C	G	#NAME?	G:7 C:56	CDS	-	864/1266	288/421	synonymous_variant c.864G>C p.Pro288Pro	MSMEG_RS22095		hypothetical protein
NC_008596	4667495	snp	G	T	#NAME?	T:8 G:51	CDS	-	849/1266	283/421	missense_variant c.849C>A p.Phe283Leu	MSMEG_RS22095		hypothetical protein
NC_008596	4678425	snp,snp	A	C,T	#NAME?	C,T:6,9 A:101	CDS	-	56/1053	19/350	missense_variant c.56T>G p.Leu19Arg	MSMEG_RS22150		ABC transporter substrate-binding protein
NC_008596	4711934	snp	T	G	#NAME?	G:6 T:50	CDS	-	1067/3114	356/1037	missense_variant c.1067A>C p.Asp356Ala	MSMEG_RS22325		ribonuclease E/G
NC_008596	4748334	snp	T	G	#NAME?	G:12 T:75	CDS	+	82/885	28/294	missense_variant c.82T>G p.Trp28Gly	MSMEG_RS22490		aldolase
NC_008596	4774348	snp	G	C	#NAME?	C:15 G:79	CDS	+	70/405	24/134	missense_variant c.70G>C p.Ala24Pro	MSMEG_RS22620		DUF732 domain-containing protein
NC_008596	4930029	snp	T	G	#NAME?	G:9 T:67	CDS	-	599/1149	200/382	missense_variant c.599A>C p.Asp200Ala	MSMEG_RS23295		thiolase family protein
NC_008596	4976066	snp	G	T	#NAME?	T:8 G:70	CDS	-	255/399	85/132	synonymous_variant c.255C>A p.Ile85Ile	MSMEG_RS23520		cobalamin B12-binding domain-containing protein
NC_008596	4990365	snp	A	C	#NAME?	C:15 A:58	CDS	-	167/261	56/86	missense_variant c.167T>G p.Leu56Arg	MSMEG_RS23585		hypothetical protein
NC_008596	4990371	snp	A	C	#NAME?	C:10 A:57	CDS	-	161/261	54/86	missense_variant c.161T>G p.Val54Gly	MSMEG_RS23585		hypothetical protein
NC_008596	4990374	complex	ACCCG	CCCCC	#NAME?	CCCCC:9 ACCCG:48	CDS	-	158/261	52/86	missense_variant c.154_158delCGGGTinsGGGGG p.ArgVal52GlyGly	MSMEG_RS23585		hypothetical protein
NC_008596	4990383	snp	G	C	#NAME?	C:11 G:57	CDS	-	149/261	50/86	missense_variant c.149C>G p.Ala50Gly	MSMEG_RS23585		hypothetical protein
NC_008596	4990386	snp	A	C	#NAME?	C:13 A:56	CDS	-	146/261	49/86	missense_variant c.146T>G p.Val49Gly	MSMEG_RS23585		hypothetical protein
NC_008596	5009690	snp	G	T	#NAME?	T:12 G:82
NC_008596	5067990	snp	C	A	#NAME?	A:8 C:68	CDS	-	983/1020	328/339	missense_variant c.983G>T p.Gly328Val	MSMEG_RS23965		nitronate monooxygenase
NC_008596	5191148	snp	C	A	#NAME?	A:12 C:105
NC_008596	5198634	snp	A	C	#NAME?	C:13 A:66
NC_008596	5285730	snp	C	A	#NAME?	A:11 C:74
NC_008596	5385059	snp	T	G	#NAME?	G:11 T:79	CDS	-	100/261	34/86	missense_variant c.100A>C p.Thr34Pro	MSMEG_RS25515		hypothetical protein
NC_008596	5385068	snp	T	G	#NAME?	G:10 T:78	CDS	-	91/261	31/86	missense_variant c.91A>C p.Thr31Pro	MSMEG_RS25515		hypothetical protein
NC_008596	5385091	snp	A	C	#NAME?	C:9 A:73	CDS	-	68/261	23/86	missense_variant c.68T>G p.Leu23Arg	MSMEG_RS25515		hypothetical protein
NC_008596	5399203	snp	A	C	#NAME?	C:6 A:53	CDS	-	578/1125	193/374	missense_variant c.578T>G p.Leu193Arg	MSMEG_RS25580		hypothetical protein
NC_008596	5412496	snp	G	T	#NAME?	T:13 G:102
NC_008596	5422697	snp	C	G	#NAME?	G:9 C:78	CDS	-	628/642	210/213	missense_variant c.628G>C p.Ala210Pro	MSMEG_RS25715		transporter
NC_008596	5422713	snp	T	G	#NAME?	G:12 T:73	CDS	-	612/642	204/213	synonymous_variant c.612A>C p.Pro204Pro	MSMEG_RS25715		transporter
NC_008596	5437949	snp	G	C	#NAME?	C:8 G:50
NC_008596	5493881	snp	T	G	#NAME?	G:11 T:82	CDS	-	669/1170	223/389	synonymous_variant c.669A>C p.Pro223Pro	MSMEG_RS26085		DUF501 domain-containing protein
NC_008596	5521099	snp	C	A	#NAME?	A:10 C:88	CDS	+	675/864	225/287	missense_variant c.675C>A p.Phe225Leu	MSMEG_RS26195		serine/threonine protein kinase
NC_008596	5558794	snp	C	G	#NAME?	G:10 C:82
NC_008596	5559784	snp	G	T	#NAME?	T:10 G:86	CDS	-	819/1797	273/598	missense_variant c.819C>A p.Phe273Leu	MSMEG_RS26385	gcl	glyoxylate carboligase
NC_008596	5565888	snp	A	C	#NAME?	C:16 A:97
NC_008596	5693399	complex	TGT	AGC	#NAME?	AGC:23 TGT:0
NC_008596	5693432	complex	G	CGGC	#NAME?	CGGC:14 G:0
NC_008596	5723889	snp	G	C	#NAME?	C:10 G:67	CDS	-	870/1608	290/535	synonymous_variant c.870C>G p.Ala290Ala	MSMEG_RS27170		serine hydrolase
NC_008596	5730218	snp	T	G	#NAME?	G:8 T:52	CDS	+	127/1470	43/489	missense_variant c.127T>G p.Ser43Ala	MSMEG_RS27195		acetyl-CoA carboxylase carboxyltransferase subunit beta
NC_008596	5755590	snp,snp	T	A,G	#NAME?	A,G:6,11 T:43	CDS	+	140/711	47/236	missense_variant c.140T>A p.Leu47Gln	MSMEG_RS27290	prrA	two-component system response regulator PrrA
NC_008596	5755595	snp	A	C	#NAME?	C:8 A:51	CDS	+	145/711	49/236	missense_variant c.145A>C p.Ser49Arg	MSMEG_RS27290	prrA	two-component system response regulator PrrA
NC_008596	5755616	snp	G	C	#NAME?	C:9 G:72	CDS	+	166/711	56/236	missense_variant c.166G>C p.Asp56His	MSMEG_RS27290	prrA	two-component system response regulator PrrA
NC_008596	5786186	snp	A	C	#NAME?	C:9 A:77	CDS	+	609/1461	203/486	synonymous_variant c.609A>C p.Ala203Ala	MSMEG_RS27470		transglycosylase family protein
NC_008596	5803135	snp	G	T	#NAME?	T:9 G:46
NC_008596	5843149	snp	G	T	#NAME?	T:9 G:80	CDS	-	113/435	38/144	stop_gained c.113C>A p.Ser38*	MSMEG_RS27810		hypothetical protein
NC_008596	5917300	snp	T	G	#NAME?	G:11 T:68	CDS	-	110/630	37/209	missense_variant c.110A>C p.His37Pro	MSMEG_RS28195		TetR family transcriptional regulator
NC_008596	5954026	snp	T	G	#NAME?	G:13 T:50	CDS	-	69/633	23/210	synonymous_variant c.69A>C p.Ala23Ala	MSMEG_RS28410		hypothetical protein
NC_008596	5977759	snp	C	A	#NAME?	A:7 C:55
NC_008596	6008846	snp	G	T	#NAME?	T:8 G:67	CDS	-	669/1320	223/439	missense_variant c.669C>A p.Phe223Leu	MSMEG_RS28665		oligosaccharide flippase family protein
NC_008596	6107490	snp	T	A	#NAME?	A:17 T:112
NC_008596	6130429	snp	C	A	#NAME?	A:8 C:62	CDS	-	126/792	42/263	synonymous_variant c.126G>T p.Pro42Pro	MSMEG_RS29235		ABC transporter ATP-binding protein
NC_008596	6135864	snp	A	C	#NAME?	C:10 A:64	CDS	+	604/945	202/314	missense_variant c.604A>C p.Ser202Arg	MSMEG_RS29280		MBL fold metallo-hydrolase
NC_008596	6135889	snp	T	G	#NAME?	G:15 T:51	CDS	+	629/945	210/314	missense_variant c.629T>G p.Leu210Arg	MSMEG_RS29280		MBL fold metallo-hydrolase
NC_008596	6135898	snp	A	C	#NAME?	C:19 A:53	CDS	+	638/945	213/314	missense_variant c.638A>C p.Gln213Pro	MSMEG_RS29280		MBL fold metallo-hydrolase
NC_008596	6162249	snp	C	G	#NAME?	G:15 C:59	CDS	-	1263/1620	421/539	synonymous_variant c.1263G>C p.Pro421Pro	MSMEG_RS29420		hypothetical protein
NC_008596	6197165	snp,snp	T	A,G	#NAME?	A,G:6,9 T:70	CDS	-	995/1599	332/532	missense_variant c.995A>T p.Glu332Val	MSMEG_RS29595		aldehyde dehydrogenase (NADP(+))
NC_008596	6285396	snp,snp	A	C,T	#NAME?	C,T:8,7 A:90	CDS	-	239/993	80/330	missense_variant c.239T>G p.Leu80Arg	MSMEG_RS30005		stage II sporulation protein M
NC_008596	6307444	snp	C	A	#NAME?	A:11 C:73	CDS	-	58/1059	20/352	stop_gained c.58G>T p.Glu20*	MSMEG_RS30105		MoxR family ATPase
NC_008596	6317105	snp	G	C	#NAME?	C:12 G:106	CDS	-	467/642	156/213	missense_variant c.467C>G p.Ala156Gly	MSMEG_RS30155		sensor domain-containing protein
NC_008596	6336541	complex	TC	GT	#NAME?	GT:36 TC:0
NC_008596	6342971	snp	G	T	#NAME?	T:13 G:91	CDS	+	256/720	86/239	stop_gained c.256G>T p.Glu86*	MSMEG_RS30275		type 1 glutamine amidotransferase
NC_008596	6347490	snp,snp	G	C,T	#NAME?	C,T:6,8 G:92	CDS	+	774/1401	258/466	missense_variant c.774G>C p.Glu258Asp	MSMEG_RS30305		FAD-binding oxidoreductase
NC_008596	6352372	snp	G	T	#NAME?	T:16 G:110	CDS	-	402/1287	134/428	missense_variant c.402C>A p.Phe134Leu	MSMEG_RS30320		aminotransferase class I/II-fold pyridoxal phosphate-dependent enzyme
NC_008596	6426616	snp	C	A	#NAME?	A:12 C:81	CDS	+	1332/1410	444/469	missense_variant c.1332C>A p.Phe444Leu	MSMEG_RS30730		PLP-dependent aminotransferase family protein
NC_008596	6443071	snp	T	G	#NAME?	G:11 T:83	CDS	+	1016/1851	339/616	missense_variant c.1016T>G p.Val339Gly	MSMEG_RS30805		arabinofuranosyltransferase
NC_008596	6443080	snp	G	C	#NAME?	C:18 G:82	CDS	+	1025/1851	342/616	missense_variant c.1025G>C p.Arg342Pro	MSMEG_RS30805		arabinofuranosyltransferase
NC_008596	6458610	snp	A	C	#NAME?	C:11 A:74	CDS	-	3656/5526	1219/1841	missense_variant c.3656T>G p.Val1219Gly	MSMEG_RS30835		acyltransferase domain-containing protein
NC_008596	6467047	complex	TCGA	CTGACG	#NAME?	CTGACG:18 TCGA:0
NC_008596	6501291	snp	C	G	#NAME?	G:13 C:80
NC_008596	6501295	snp	T	G	#NAME?	G:14 T:79
NC_008596	6595371	snp	G	C	#NAME?	C:11 G:94	CDS	+	472/576	158/191	missense_variant c.472G>C p.Ala158Pro	MSMEG_RS31525		TetR/AcrR family transcriptional regulator
NC_008596	6628095	snp	T	G	#NAME?	G:8 T:10	CDS	-	568/1668	190/555	missense_variant c.568A>C p.Thr190Pro	MSMEG_RS31695		HNH endonuclease
NC_008596	6687505	ins	C	CCG	#NAME?	CCG:15 C:0
NC_008596	6715794	snp	C	G	#NAME?	G:12 C:97	CDS	+	1365/1437	455/478	synonymous_variant c.1365C>G p.Gly455Gly	MSMEG_RS32105		cytosine permease
NC_008596	6726750	snp	C	G	#NAME?	G:9 C:77	CDS	+	509/1470	170/489	missense_variant c.509C>G p.Ser170Trp	MSMEG_RS32170		amidase
NC_008596	6726884	snp	G	T	#NAME?	T:8 G:57	CDS	+	643/1470	215/489	missense_variant c.643G>T p.Asp215Tyr	MSMEG_RS32170		amidase
NC_008596	6773720	snp,snp	G	C,T	#NAME?	C,T:7,7 G:95	CDS	-	170/630	57/209	stop_gained c.170C>A p.Ser57*	MSMEG_RS32415		ABC transporter permease
NC_008596	6817504	snp	G	T	#NAME?	T:8 G:65	CDS	-	825/1752	275/583	synonymous_variant c.825C>A p.Ile275Ile	MSMEG_RS32625		tryptophan 7-halogenase
NC_008596	6825446	snp,snp	G	C,T	#NAME?	C,T:7,7 G:92	CDS	+	1355/1356	452/451	stop_lost&splice_region_variant c.1355G>C p.Ter452Serext*?	MSMEG_RS32660		MHS family MFS transporter
NC_008596	6825458	snp	G	T	#NAME?	T:11 G:94
NC_008596	6963100	snp	C	G	#NAME?	G:10 C:62
NC_008596	6963101	snp	C	G	#NAME?	G:16 C:53
NC_008596	6963111	snp	A	C	#NAME?	C:7 A:52
NC_008596	6971533	snp	T	G	#NAME?	G:12 T:84	CDS	+	2138/2403	713/800	missense_variant c.2138T>G p.Leu713Arg	MSMEG_RS33380		hypothetical protein
NC_008596	6971539	snp	T	A	#NAME?	A:14 T:77	CDS	+	2144/2403	715/800	missense_variant c.2144T>A p.Leu715His	MSMEG_RS33380		hypothetical protein

## Sheet: KuDCCP-MIX
The analysis of M. smegmatis KuDCCP mutant growing in the presence of CHP
CHROM	POS	TYPE	REF	ALT	variants	EVIDENCE	FTYPE	STRAND	NT_POS	AA_POS	EFFECT	LOCUS_TAG	GENE	PRODUCT
NC_008596	41656	snp	T	G	#NAME?	G:13 T:89
NC_008596	64992	snp	T	G	#NAME?	G:13 T:39	CDS	+	1448/2469	483/822	missense_variant c.1448T>G p.Val483Gly	MSMEG_RS00215		hypothetical protein
NC_008596	65001	snp	A	C	#NAME?	C:9 A:42	CDS	+	1457/2469	486/822	missense_variant c.1457A>C p.Asp486Ala	MSMEG_RS00215		hypothetical protein
NC_008596	65010	snp	T	G	#NAME?	G:10 T:53	CDS	+	1466/2469	489/822	missense_variant c.1466T>G p.Leu489Arg	MSMEG_RS00215		hypothetical protein
NC_008596	65025	snp	T	G	#NAME?	G:10 T:60	CDS	+	1481/2469	494/822	missense_variant c.1481T>G p.Val494Gly	MSMEG_RS00215		hypothetical protein
NC_008596	71211	snp	G	C	#NAME?	C:9 G:70	CDS	+	301/780	101/259	missense_variant c.301G>C p.Glu101Gln	MSMEG_RS00250		helix-turn-helix domain-containing protein
NC_008596	71212	snp	A	C	#NAME?	C:8 A:68	CDS	+	302/780	101/259	missense_variant c.302A>C p.Glu101Ala	MSMEG_RS00250		helix-turn-helix domain-containing protein
NC_008596	71216	snp	G	C	#NAME?	C:11 G:66	CDS	+	306/780	102/259	synonymous_variant c.306G>C p.Pro102Pro	MSMEG_RS00250		helix-turn-helix domain-containing protein
NC_008596	221828	snp	G	C	#NAME?	C:11 G:92	CDS	+	586/897	196/298	missense_variant c.586G>C p.Ala196Pro	MSMEG_RS00965		TIGR03619 family F420-dependent LLM class oxidoreductase
NC_008596	221872	snp	C	A	#NAME?	A:11 C:87	CDS	+	630/897	210/298	missense_variant c.630C>A p.Phe210Leu	MSMEG_RS00965		TIGR03619 family F420-dependent LLM class oxidoreductase
NC_008596	241477	snp	C	G	#NAME?	G:12 C:100	CDS	-	295/1284	99/427	missense_variant c.295G>C p.Asp99His	MSMEG_RS01050		gluconolaconase
NC_008596	246312	snp	C	A	#NAME?	A:14 C:106
NC_008596	249680	snp	C	G	#NAME?	G:19 C:81	CDS	+	225/657	75/218	synonymous_variant c.225C>G p.Arg75Arg	MSMEG_RS01100		O-methyltransferase
NC_008596	249685	snp	T	G	#NAME?	G:15 T:63	CDS	+	230/657	77/218	missense_variant c.230T>G p.Val77Gly	MSMEG_RS01100		O-methyltransferase
NC_008596	308644	snp	G	T	#NAME?	T:6 G:37	CDS	-	458/1584	153/527	stop_gained c.458C>A p.Ser153*	MSMEG_RS01360		aldehyde dehydrogenase family protein
NC_008596	308661	snp	C	G	#NAME?	G:6 C:49	CDS	-	441/1584	147/527	synonymous_variant c.441G>C p.Pro147Pro	MSMEG_RS01360		aldehyde dehydrogenase family protein
NC_008596	313842	snp	T	G	#NAME?	G:16 T:55	CDS	+	494/1572	165/523	missense_variant c.494T>G p.Val165Gly	MSMEG_RS01385		GMC family oxidoreductase
NC_008596	321967	snp	G	T	#NAME?	T:12 G:95	CDS	+	582/1419	194/472	synonymous_variant c.582G>T p.Arg194Arg	MSMEG_RS01430		wax ester/triacylglycerol synthase family O-acyltransferase
NC_008596	358598	snp	C	A	#NAME?	A:10 C:77	CDS	-	111/2793	37/930	missense_variant c.111G>T p.Leu37Phe	MSMEG_RS01585		AAA family ATPase
NC_008596	385049	snp	A	C	#NAME?	C:13 A:107	CDS	+	1347/1425	449/474	synonymous_variant c.1347A>C p.Pro449Pro	MSMEG_RS01705		MCE family protein
NC_008596	409777	snp	T	G	#NAME?	G:11 T:86	CDS	+	1262/1467	421/488	missense_variant c.1262T>G p.Leu421Arg	MSMEG_RS01815		DUF3375 domain-containing protein
NC_008596	417993	snp,snp	C	A,G	#NAME?	A,G:10,6 C:96
NC_008596	431660	snp	T	G	#NAME?	G:7 T:42
NC_008596	474517	snp	G	T	#NAME?	T:12 G:93	CDS	-	8055/10959	2685/3652	missense_variant c.8055C>A p.Phe2685Leu	MSMEG_RS02005		type I polyketide synthase
NC_008596	497579	snp	C	A	#NAME?	A:14 C:105	CDS	+	570/768	190/255	missense_variant c.570C>A p.Phe190Leu	MSMEG_RS02065		isocitrate lyase/phosphoenolpyruvate mutase family protein
NC_008596	508376	snp,snp	T	A,G	#NAME?	A,G:6,6 T:98	CDS	-	281/1158	94/385	missense_variant c.281A>T p.Glu94Val	MSMEG_RS02115		uroporphyrinogen-III synthase
NC_008596	572618	snp,snp	T	A,G	#NAME?	A,G:7,7 T:91
NC_008596	597714	snp	C	A	#NAME?	A:16 C:122	CDS	+	71/927	24/308	stop_gained c.71C>A p.Ser24*	MSMEG_RS02515		carbohydrate ABC transporter permease
NC_008596	658721	snp	G	C	#NAME?	C:6 G:45	CDS	+	1046/1347	349/448	missense_variant c.1046G>C p.Arg349Pro	MSMEG_RS02825	gabT	4-aminobutyrate--2-oxoglutarate transaminase
NC_008596	660937	snp	G	T	#NAME?	T:13 G:106
NC_008596	673035	snp	C	A	#NAME?	A:15 C:93	CDS	-	517/738	173/245	stop_gained c.517G>T p.Glu173*	MSMEG_RS02890		(Fe-S)-binding protein
NC_008596	675081	snp,snp	T	A,G	#NAME?	A,G:7,7 T:91	CDS	-	938/1239	313/412	missense_variant c.938A>T p.Lys313Met	MSMEG_RS02905		DNA polymerase domain-containing protein
NC_008596	676332	snp	G	T	#NAME?	T:10 G:84	CDS	+	259/1677	87/558	stop_gained c.259G>T p.Glu87*	MSMEG_RS02910		acyl-CoA synthetase
NC_008596	725019	complex,snp	CGGT	GGGG,CGGG	#NAME?	GGGG,CGGG:11,11 CGGT:88	CDS	-	49/1011	17/336	missense_variant c.49A>C p.Thr17Pro	MSMEG_RS03125		ABC transporter permease
NC_008596	780520	snp	A	C	#NAME?	C:14 A:98	CDS	-	647/1788	216/595	missense_variant c.647T>G p.Val216Gly	MSMEG_RS03375		Hsp70 family protein
NC_008596	783285	snp	C	G	#NAME?	G:11 C:74
NC_008596	783293	snp	A	C	#NAME?	C:11 A:39
NC_008596	783297	snp	G	C	#NAME?	C:8 G:34
NC_008596	783299	snp,snp	A	C,T	#NAME?	C,T:8,11 A:26
NC_008596	783301	snp	T	G	#NAME?	G:13 T:32
NC_008596	783304	complex	TGG	GGC	#NAME?	GGC:6 TGG:31
NC_008596	796551	snp,snp	T	A,G	#NAME?	A,G:7,6 T:87
NC_008596	850847	snp	C	G	#NAME?	G:15 C:69	CDS	-	363/1584	121/527	synonymous_variant c.363G>C p.Pro121Pro	MSMEG_RS03725		Na+/H+ antiporter
NC_008596	954433	snp	T	G	#NAME?	G:10 T:43	CDS	-	977/3825	326/1274	missense_variant c.977A>C p.Asp326Ala	MSMEG_RS04235		hypothetical protein
NC_008596	954442	snp	A	C	#NAME?	C:7 A:48	CDS	-	968/3825	323/1274	missense_variant c.968T>G p.Val323Gly	MSMEG_RS04235		hypothetical protein
NC_008596	971947	snp	C	G	#NAME?	G:11 C:57	CDS	-	864/1491	288/496	synonymous_variant c.864G>C p.Pro288Pro	MSMEG_RS04320		serine/threonine protein kinase
NC_008596	1032801	snp	C	A	#NAME?	A:18 C:106	CDS	+	1224/1668	408/555	missense_variant c.1224C>A p.Phe408Leu	MSMEG_RS04650		uroporphyrinogen-III synthase
NC_008596	1040930	snp	G	C	#NAME?	C:13 G:104	CDS	+	375/1455	125/484	synonymous_variant c.375G>C p.Pro125Pro	MSMEG_RS04715		cytochrome P450
NC_008596	1153726	snp	G	C	#NAME?	C:6 G:52	CDS	+	826/1401	276/466	missense_variant c.826G>C p.Ala276Pro	MSMEG_RS05295		amidase
NC_008596	1153734	snp	C	G	#NAME?	G:7 C:51	CDS	+	834/1401	278/466	missense_variant c.834C>G p.Phe278Leu	MSMEG_RS05295		amidase
NC_008596	1153741	snp	G	C	#NAME?	C:8 G:54	CDS	+	841/1401	281/466	missense_variant c.841G>C p.Ala281Pro	MSMEG_RS05295		amidase
NC_008596	1153745	snp	T	A	#NAME?	A:7 T:50	CDS	+	845/1401	282/466	missense_variant c.845T>A p.Ile282Asn	MSMEG_RS05295		amidase
NC_008596	1153746	snp	C	A	#NAME?	A:8 C:54	CDS	+	846/1401	282/466	synonymous_variant c.846C>A p.Ile282Ile	MSMEG_RS05295		amidase
NC_008596	1153754	snp	T	A	#NAME?	A:9 T:47	CDS	+	854/1401	285/466	missense_variant c.854T>A p.Leu285His	MSMEG_RS05295		amidase
NC_008596	1153756	snp,snp	G	C,T	#NAME?	C,T:6,6 G:46	CDS	+	856/1401	286/466	stop_gained c.856G>T p.Glu286*	MSMEG_RS05295		amidase
NC_008596	1272021	snp	C	G	#NAME?	G:14 C:102
NC_008596	1280807	snp	T	G	#NAME?	G:12 T:84
NC_008596	1294890	snp	A	C	#NAME?	C:12 A:67	CDS	-	993/1293	331/430	synonymous_variant c.993T>G p.Arg331Arg	MSMEG_RS05985		DUF2786 domain-containing protein
NC_008596	1321712	snp	C	A	#NAME?	A:17 C:97	CDS	+	482/1437	161/478	stop_gained c.482C>A p.Ser161*	MSMEG_RS06090		DNA phosphorothioation-associated putative methyltransferase
NC_008596	1331262	snp	C	A	#NAME?	A:13 C:105	CDS	+	3720/6366	1240/2121	missense_variant c.3720C>A p.Phe1240Leu	MSMEG_RS06115		DUF3320 domain-containing protein
NC_008596	1480930	snp	C	G	#NAME?	G:12 C:56	CDS	-	677/705	226/234	missense_variant c.677G>C p.Arg226Pro	MSMEG_RS06740		TetR/AcrR family transcriptional regulator
NC_008596	1519592	snp	G	T	#NAME?	T:14 G:59
NC_008596	1519596	snp	A	G	#NAME?	G:9 A:54
NC_008596	1519620	snp	G	T	#NAME?	T:8 G:44
NC_008596	1519630	snp	C	A	#NAME?	A:18 C:42
NC_008596	1534655	snp	C	A	#NAME?	A:9 C:66	CDS	+	216/1587	72/528	missense_variant c.216C>A p.Phe72Leu	MSMEG_RS07000		carboxylesterase family protein
NC_008596	1609023	snp	C	G	#NAME?	G:9 C:58	CDS	-	13/1692	5/563	missense_variant c.13G>C p.Ala5Pro	MSMEG_RS07410		FAD-dependent oxidoreductase
NC_008596	1696111	snp	C	A	#NAME?	A:13 C:102	CDS	-	1357/2361	453/786	stop_gained c.1357G>T p.Glu453*	MSMEG_RS07855		glycoside hydrolase family 65 protein
NC_008596	1719222	snp	G	T	#NAME?	T:6 G:26
NC_008596	1737207	snp,snp	G	C,T	#NAME?	C,T:7,7 G:102	CDS	+	659/1770	220/589	missense_variant c.659G>C p.Gly220Ala	MSMEG_RS08025		PQQ-binding-like beta-propeller repeat protein
NC_008596	1847611	snp	T	G	#NAME?	G:7 T:61	CDS	-	2732/4524	911/1507	missense_variant c.2732A>C p.Glu911Ala	MSMEG_RS08550		ATP-dependent helicase
NC_008596	1865097	snp	T	G	#NAME?	G:10 T:40	CDS	-	230/342	77/113	missense_variant c.230A>C p.His77Pro	MSMEG_RS08645		hypothetical protein
NC_008596	1897472	snp	T	G	#NAME?	G:10 T:70	CDS	+	248/813	83/270	missense_variant c.248T>G p.Val83Gly	MSMEG_RS08850		biotin--[acetyl-CoA-carboxylase] ligase
NC_008596	1904763	snp,snp	T	A,G	#NAME?	A,G:6,10 T:63	CDS	-	391/1365	131/454	missense_variant c.391A>T p.Ser131Cys	MSMEG_RS08885		coenzyme F420-0:L-glutamate ligase
NC_008596	1905302	snp	T	G	#NAME?	G:10 T:71	CDS	-	832/984	278/327	missense_variant c.832A>C p.Thr278Pro	MSMEG_RS08890		2-phospho-L-lactate transferase
NC_008596	1956350	snp,snp	C	A,G	#NAME?	A,G:9,6 C:91
NC_008596	1985529	snp	G	C	#NAME?	C:8 G:67	CDS	-	132/2400	44/799	synonymous_variant c.132C>G p.Ala44Ala	MSMEG_RS09245		CoA transferase
NC_008596	1990198	snp	C	G	#NAME?	G:13 C:92	CDS	-	706/2763	236/920	missense_variant c.706G>C p.Gly236Arg	MSMEG_RS09260		1,6-dihydroxycyclohexa-2,4-diene-1-carboxylate dehydrogenase
NC_008596	2018821	snp	A	T	#NAME?	T:8 A:62	CDS	+	1537/3138	513/1045	missense_variant c.1537A>T p.Ser513Cys	MSMEG_RS09425		ATP-dependent DNA helicase AdnA
NC_008596	2044647	snp	A	C	#NAME?	C:11 A:73	CDS	+	2059/3399	687/1132	missense_variant c.2059A>C p.Thr687Pro	MSMEG_RS09525		AAA family ATPase
NC_008596	2129644	snp	C	A	#NAME?	A:11 C:89	CDS	-	1277/1590	426/529	missense_variant c.1277G>T p.Arg426Leu	MSMEG_RS09955		NADH-quinone oxidoreductase subunit M
NC_008596	2168912	snp	C	G	#NAME?	G:10 C:79	CDS	+	873/1104	291/367	synonymous_variant c.873C>G p.Val291Val	MSMEG_RS10155		P1 family peptidase
NC_008596	2223899	snp	A	C	#NAME?	C:8 A:58	CDS	+	1113/1590	371/529	synonymous_variant c.1113A>C p.Pro371Pro	MSMEG_RS10425		HNH endonuclease
NC_008596	2248444	snp	T	G	#NAME?	G:12 T:99
NC_008596	2257350	snp	C	G	#NAME?	G:7 C:51	CDS	+	897/1305	299/434	synonymous_variant c.897C>G p.Arg299Arg	MSMEG_RS10570		TetR/AcrR family transcriptional regulator
NC_008596	2280457	snp	C	A	#NAME?	A:12 C:98	CDS	+	16/891	6/296	missense_variant c.16C>A p.Pro6Thr	MSMEG_RS10675	purU	formyltetrahydrofolate deformylase
NC_008596	2335382	snp	T	G	#NAME?	G:24 T:60
NC_008596	2348203	snp	A	T	#NAME?	T:11 A:92	CDS	+	458/798	153/265	missense_variant c.458A>T p.Gln153Leu	MSMEG_RS10970		hydrogenase maturation protease
NC_008596	2363171	snp	C	G	#NAME?	G:7 C:41
NC_008596	2363188	snp	A	C	#NAME?	C:11 A:46
NC_008596	2434412	snp	A	C	#NAME?	C:7 A:61
NC_008596	2437925	snp	G	C	#NAME?	C:10 G:78	CDS	+	139/1209	47/402	missense_variant c.139G>C p.Ala47Pro	MSMEG_RS11415		cysteine desulfurase
NC_008596	2495353	snp	A	G	#NAME?	G:9 A:74	CDS	+	2293/3384	765/1127	missense_variant c.2293A>G p.Thr765Ala	MSMEG_RS11690		pyruvate carboxylase
NC_008596	2518662	snp	T	G	#NAME?	G:10 T:78	CDS	-	434/891	145/296	missense_variant c.434A>C p.Glu145Ala	MSMEG_RS11795		D-alanyl-D-alanine carboxypeptidase
NC_008596	2536799	snp	A	C	#NAME?	C:13 A:92	CDS	+	601/999	201/332	missense_variant c.601A>C p.Thr201Pro	MSMEG_RS11910		LLM class flavin-dependent oxidoreductase
NC_008596	2593634	snp	T	G	#NAME?	G:18 T:76	CDS	+	362/369	121/122	missense_variant c.362T>G p.Val121Gly	MSMEG_RS12165		YraN family protein
NC_008596	2635639	snp,snp	G	C,T	#NAME?	C,T:9,8 G:94
NC_008596	2800804	snp	T	G	#NAME?	G:6 T:34	CDS	-	76/1365	26/454	missense_variant c.76A>C p.Thr26Pro	MSMEG_RS13240		DUF349 domain-containing protein
NC_008596	2803654	snp	T	G	#NAME?	G:12 T:43	CDS	+	156/876	52/291	synonymous_variant c.156T>G p.Gly52Gly	MSMEG_RS13260		diaminopimelate epimerase
NC_008596	2880363	snp,snp	C	A,G	#NAME?	A,G:6,7 C:38	CDS	+	156/297	52/98	synonymous_variant c.156C>A p.Val52Val	MSMEG_RS13655		ABC transporter ATP-binding protein
NC_008596	2937653	snp	G	T	#NAME?	T:10 G:77	CDS	-	721/981	241/326	missense_variant c.721C>A p.Pro241Thr	MSMEG_RS13945		alpha/beta hydrolase
NC_008596	2946514	snp	C	G	#NAME?	G:9 C:64	CDS	-	499/1584	167/527	missense_variant c.499G>C p.Ala167Pro	MSMEG_RS13985		acyl-CoA synthetase
NC_008596	2960649	snp	A	C	#NAME?	C:12 A:82	CDS	+	559/870	187/289	missense_variant c.559A>C p.Thr187Pro	MSMEG_RS14050		LLM class F420-dependent oxidoreductase
NC_008596	3015741	snp	A	G	#NAME?	G:6 A:23
NC_008596	3081544	snp	C	A	#NAME?	A:13 C:112
NC_008596	3105783	complex	T	GTG	#NAME?	GTG:12 T:0	CDS	+	1066/1134	356/377	frameshift_variant&missense_variant c.1066delTinsGTG p.Cys356fs	MSMEG_RS14730		3-dehydroquinate synthase
NC_008596	3105805	snp	T	C	#NAME?	C:16 T:0	CDS	+	1088/1134	363/377	missense_variant c.1088T>C p.Leu363Pro	MSMEG_RS14730		3-dehydroquinate synthase
NC_008596	3109206	ins	A	ACG	#NAME?	ACG:28 A:0	CDS	+	337/2620	113/872	frameshift_variant c.336_337insGC p.Pro113fs	MSMEG_RS14755		helix-turn-helix transcriptional regulator
NC_008596	3142270	snp	T	G	#NAME?	G:12 T:76	CDS	-	1688/1701	563/566	missense_variant c.1688A>C p.His563Pro	MSMEG_RS14905		MFS transporter
NC_008596	3146643	snp	G	C	#NAME?	C:10 G:81	CDS	+	1185/1320	395/439	missense_variant c.1185G>C p.Met395Ile	MSMEG_RS14920		bifunctional 3,4-dihydroxy-2-butanone-4-phosphate synthase/GTP cyclohydrolase II
NC_008596	3146649	snp	A	C	#NAME?	C:11 A:83	CDS	+	1191/1320	397/439	missense_variant c.1191A>C p.Lys397Asn	MSMEG_RS14920		bifunctional 3,4-dihydroxy-2-butanone-4-phosphate synthase/GTP cyclohydrolase II
NC_008596	3150063	snp	A	C	#NAME?	C:13 A:80	CDS	-	64/1911	22/636	missense_variant c.64T>G p.Cys22Gly	MSMEG_RS14940	ggt	gamma-glutamyltransferase
NC_008596	3160083	snp	C	G	#NAME?	G:15 C:59	CDS	+	549/786	183/261	synonymous_variant c.549C>G p.Ala183Ala	MSMEG_RS14990		triose-phosphate isomerase
NC_008596	3269577	snp	C	G	#NAME?	G:14 C:41
NC_008596	3285877	snp	C	G	#NAME?	G:7 C:56	CDS	+	341/1140	114/379	missense_variant c.341C>G p.Pro114Arg	MSMEG_RS15570		histidinol-phosphate transaminase
NC_008596	3301339	snp	G	T	#NAME?	T:9 G:58	CDS	+	1381/1851	461/616	stop_gained c.1381G>T p.Glu461*	MSMEG_RS15650		prolipoprotein diacylglyceryl transferase
NC_008596	3304085	snp	G	T	#NAME?	T:12 G:90	CDS	+	1374/4557	458/1518	synonymous_variant c.1374G>T p.Ala458Ala	MSMEG_RS15665	gltB	glutamate synthase large subunit
NC_008596	3328242	complex	GCCCT	CC	#NAME?	CC:19 GCCCT:0	CDS	+	677/954	226/317	missense_variant&conservative_inframe_deletion c.677_681delGCCCTinsCC p.Gly226_Pro227delinsAla	MSMEG_RS15765		hypothetical protein
NC_008596	3339642	snp	A	C	#NAME?	C:8 A:70	CDS	+	119/1221	40/406	missense_variant c.119A>C p.Glu40Ala	MSMEG_RS15835		acyl-CoA dehydrogenase family protein
NC_008596	3394377	snp	G	T	#NAME?	T:12 G:88	CDS	-	94/276	32/91	missense_variant c.94C>A p.Pro32Thr	MSMEG_RS16090		hypothetical protein
NC_008596	3479915	snp	A	C	#NAME?	C:6 A:47
NC_008596	3479920	snp	C	A	#NAME?	A:10 C:37
NC_008596	3485101	snp,snp	A	C,T	#NAME?	C,T:9,8 A:85	CDS	-	450/867	150/288	synonymous_variant c.450T>G p.Pro150Pro	MSMEG_RS16595		polysaccharide deacetylase family protein
NC_008596	3492948	snp	G	C	#NAME?	C:8 G:70	CDS	-	441/1425	147/474	synonymous_variant c.441C>G p.Ala147Ala	MSMEG_RS16640		MHS family MFS transporter
NC_008596	3541019	complex	GCCCGCCCG	CCCCCCCCC	#NAME?	CCCCCCCCC:12 GCCCGCCCG:57
NC_008596	3564375	snp	G	C	#NAME?	C:14 G:77	CDS	+	577/603	193/200	missense_variant c.577G>C p.Glu193Gln	MSMEG_RS17000		hypothetical protein
NC_008596	3564376	snp	A	C	#NAME?	C:10 A:85	CDS	+	578/603	193/200	missense_variant c.578A>C p.Glu193Ala	MSMEG_RS17000		hypothetical protein
NC_008596	3564387	snp	G	C	#NAME?	C:11 G:81	CDS	+	589/603	197/200	missense_variant c.589G>C p.Ala197Pro	MSMEG_RS17000		hypothetical protein
NC_008596	3569046	snp	T	G	#NAME?	G:10 T:73	CDS	+	475/1398	159/465	missense_variant c.475T>G p.Trp159Gly	MSMEG_RS17030		aspartate aminotransferase family protein
NC_008596	3572476	snp	C	G	#NAME?	G:11 C:83	CDS	+	466/654	156/217	missense_variant c.466C>G p.Arg156Gly	MSMEG_RS17045		MBL fold metallo-hydrolase
NC_008596	3592456	snp	T	G	#NAME?	G:10 T:60	CDS	-	1341/1431	447/476	synonymous_variant c.1341A>C p.Pro447Pro	MSMEG_RS17155		hypothetical protein
NC_008596	3622062	snp	A	T	#NAME?	T:13 A:91	CDS	-	1217/1371	406/456	missense_variant c.1217T>A p.Leu406Gln	MSMEG_RS17300		glutamine synthetase
NC_008596	3639877	snp	C	A	#NAME?	A:15 C:100	CDS	+	1800/2079	600/692	missense_variant c.1800C>A p.Phe600Leu	MSMEG_RS17380		HAMP domain-containing protein
NC_008596	3665726	snp	C	G	#NAME?	G:9 C:47	CDS	-	1163/1539	388/512	missense_variant c.1163G>C p.Arg388Pro	MSMEG_RS17485		sugar ABC transporter ATP-binding protein
NC_008596	3690308	snp	G	C	#NAME?	C:10 G:40
NC_008596	3792111	snp	C	G	#NAME?	G:8 C:53
NC_008596	3792115	snp	G	C	#NAME?	C:7 G:51
NC_008596	3828029	snp	C	A	#NAME?	A:8 C:70	CDS	+	297/567	99/188	missense_variant c.297C>A p.Phe99Leu	MSMEG_RS18230		Clp protease
NC_008596	3837496	snp	A	C	#NAME?	C:11 A:40	CDS	-	398/1410	133/469	missense_variant c.398T>G p.Val133Gly	MSMEG_RS18270	argH	argininosuccinate lyase
NC_008596	3837505	snp	A	C	#NAME?	C:10 A:49	CDS	-	389/1410	130/469	missense_variant c.389T>G p.Val130Gly	MSMEG_RS18270	argH	argininosuccinate lyase
NC_008596	3847886	snp,snp	T	A,G	#NAME?	A,G:13,6 T:97	CDS	-	870/1071	290/356	synonymous_variant c.870A>T p.Pro290Pro	MSMEG_RS18315	pheS	phenylalanine--tRNA ligase subunit alpha
NC_008596	3853710	snp	T	G	#NAME?	G:12 T:102	CDS	-	496/756	166/251	missense_variant c.496A>C p.Thr166Pro	MSMEG_RS18345		IclR family transcriptional regulator
NC_008596	3857384	snp	A	C	#NAME?	C:14 A:81	CDS	+	770/1602	257/533	missense_variant c.770A>C p.Lys257Thr	MSMEG_RS18360		D-aminoacylase
NC_008596	3873622	snp	G	C	#NAME?	C:18 G:15
NC_008596	3916386	ins	T	TC	#NAME?	TC:37 T:0
NC_008596	3916397	snp	C	G	#NAME?	G:8 C:15
NC_008596	3944711	snp	T	G	#NAME?	G:9 T:58	CDS	+	697/1119	233/372	missense_variant c.697T>G p.Trp233Gly	MSMEG_RS18765	cobG	precorrin-3B synthase
NC_008596	3944717	snp	C	A	#NAME?	A:9 C:63	CDS	+	703/1119	235/372	missense_variant c.703C>A p.Pro235Thr	MSMEG_RS18765	cobG	precorrin-3B synthase
NC_008596	3955477	snp	A	C	#NAME?	C:6 A:52	CDS	+	869/960	290/319	missense_variant c.869A>C p.Asp290Ala	MSMEG_RS18825		5'-3' exonuclease
NC_008596	3962065	snp	A	C	#NAME?	C:11 A:69	CDS	-	398/997	133/331	missense_variant c.398T>G p.Val133Gly	MSMEG_RS18855		YafY family transcriptional regulator
NC_008596	4136354	snp,snp	T	A,G	#NAME?	A,G:7,9 T:70
NC_008596	4173885	snp	G	T	#NAME?	T:10 G:74	CDS	-	405/1236	135/411	missense_variant c.405C>A p.Phe135Leu	MSMEG_RS19825		LLM class flavin-dependent oxidoreductase
NC_008596	4309117	snp	G	C	#NAME?	C:11 G:88	CDS	-	1280/1707	427/568	missense_variant c.1280C>G p.Ala427Gly	MSMEG_RS20455	ftsW	putative lipid II flippase FtsW
NC_008596	4342927	snp,snp	A	C,G	#NAME?	C,G:8,7 A:49	CDS	+	1625/1878	542/625	missense_variant c.1625A>C p.Asp542Ala	MSMEG_RS20610		DEDD exonuclease domain-containing protein
NC_008596	4342937	snp	C	A	#NAME?	A:7 C:57	CDS	+	1635/1878	545/625	synonymous_variant c.1635C>A p.Ile545Ile	MSMEG_RS20610		DEDD exonuclease domain-containing protein
NC_008596	4358468	snp	C	G	#NAME?	G:8 C:63	CDS	+	381/1056	127/351	synonymous_variant c.381C>G p.Val127Val	MSMEG_RS20690	cobT	nicotinate-nucleotide--dimethylbenzimidazole phosphoribosyltransferase
NC_008596	4359168	snp	C	A	#NAME?	A:9 C:72	CDS	+	6/726	2/241	synonymous_variant c.6C>A p.Ile2Ile	MSMEG_RS20695		adenosylcobinamide-GDP ribazoletransferase
NC_008596	4359176	snp	T	A	#NAME?	A:10 T:76	CDS	+	14/726	5/241	missense_variant c.14T>A p.Leu5His	MSMEG_RS20695		adenosylcobinamide-GDP ribazoletransferase
NC_008596	4359230	snp	T	G	#NAME?	G:11 T:84	CDS	+	68/726	23/241	missense_variant c.68T>G p.Val23Gly	MSMEG_RS20695		adenosylcobinamide-GDP ribazoletransferase
NC_008596	4365010	snp	T	G	#NAME?	G:12 T:77	CDS	-	1574/1737	525/578	missense_variant c.1574A>C p.Gln525Pro	MSMEG_RS20720		SDR family oxidoreductase
NC_008596	4365543	snp	C	A	#NAME?	A:12 C:98	CDS	-	1041/1737	347/578	synonymous_variant c.1041G>T p.Ala347Ala	MSMEG_RS20720		SDR family oxidoreductase
NC_008596	4383346	snp	C	G	#NAME?	G:17 C:54	CDS	-	91/1503	31/500	missense_variant c.91G>C p.Ala31Pro	MSMEG_RS20790		alpha/beta hydrolase
NC_008596	4435714	snp	T	G	#NAME?	G:11 T:86	CDS	-	172/1557	58/518	missense_variant c.172A>C p.Thr58Pro	MSMEG_RS21045		acetolactate synthase large subunit
NC_008596	4483333	snp	A	C	#NAME?	C:10 A:77	CDS	+	917/1218	306/405	missense_variant c.917A>C p.Glu306Ala	MSMEG_RS21240		acyl-CoA dehydrogenase family protein
NC_008596	4621608	snp	G	T	#NAME?	T:13 G:103
NC_008596	4639728	snp	G	T	#NAME?	T:12 G:87	CDS	-	125/984	42/327	missense_variant c.125C>A p.Ser42Tyr	MSMEG_RS21960		GNAT family N-acetyltransferase
NC_008596	4664953	snp	A	C	#NAME?	C:8 A:68	CDS	-	1184/1515	395/504	missense_variant c.1184T>G p.Val395Gly	MSMEG_RS22085		ComEC/Rec2 family competence protein
NC_008596	4686170	snp	G	C	#NAME?	C:9 G:65
NC_008596	4711920	snp	C	G	#NAME?	G:12 C:74	CDS	-	1081/3114	361/1037	missense_variant c.1081G>C p.Gly361Arg	MSMEG_RS22325		ribonuclease E/G
NC_008596	4724257	snp	G	C	#NAME?	C:8 G:36
NC_008596	4766262	snp	A	C	#NAME?	C:9 A:73	CDS	+	383/1206	128/401	missense_variant c.383A>C p.His128Pro	MSMEG_RS22575		serine hydrolase
NC_008596	4766267	snp	T	G	#NAME?	G:9 T:75	CDS	+	388/1206	130/401	missense_variant c.388T>G p.Ser130Ala	MSMEG_RS22575		serine hydrolase
NC_008596	4766284	snp	A	C	#NAME?	C:9 A:77	CDS	+	405/1206	135/401	synonymous_variant c.405A>C p.Pro135Pro	MSMEG_RS22575		serine hydrolase
NC_008596	4774352	snp	A	C	#NAME?	C:18 A:71	CDS	+	74/405	25/134	missense_variant c.74A>C p.His25Pro	MSMEG_RS22620		DUF732 domain-containing protein
NC_008596	4774358	snp	A	C	#NAME?	C:19 A:69	CDS	+	80/405	27/134	missense_variant c.80A>C p.Asp27Ala	MSMEG_RS22620		DUF732 domain-containing protein
NC_008596	4774361	snp	C	G	#NAME?	G:11 C:76	CDS	+	83/405	28/134	missense_variant c.83C>G p.Pro28Arg	MSMEG_RS22620		DUF732 domain-containing protein
NC_008596	4777790	complex	TCG	C	#NAME?	C:39 TCG:0
NC_008596	4859552	snp	T	G	#NAME?	G:7 T:56	CDS	-	2717/9270	906/3089	missense_variant c.2717A>C p.Glu906Ala	MSMEG_RS22940		type I polyketide synthase
NC_008596	4930015	snp	C	G	#NAME?	G:10 C:78	CDS	-	613/1149	205/382	missense_variant c.613G>C p.Asp205His	MSMEG_RS23295		thiolase family protein
NC_008596	4990365	snp	A	C	#NAME?	C:9 A:70	CDS	-	167/261	56/86	missense_variant c.167T>G p.Leu56Arg	MSMEG_RS23585		hypothetical protein
NC_008596	4990374	snp	A	C	#NAME?	C:9 A:68	CDS	-	158/261	53/86	missense_variant c.158T>G p.Val53Gly	MSMEG_RS23585		hypothetical protein
NC_008596	4990383	snp	G	C	#NAME?	C:9 G:59	CDS	-	149/261	50/86	missense_variant c.149C>G p.Ala50Gly	MSMEG_RS23585		hypothetical protein
NC_008596	5001757	snp	A	C	#NAME?	C:9 A:67	CDS	+	545/1305	182/434	missense_variant c.545A>C p.Gln182Pro	MSMEG_RS23670		nicotinate phosphoribosyltransferase
NC_008596	5018556	snp	G	T	#NAME?	T:14 G:93	CDS	+	370/1608	124/535	stop_gained c.370G>T p.Glu124*	MSMEG_RS23735		adenylate/guanylate cyclase domain-containing protein
NC_008596	5020045	snp,snp	A	C,T	#NAME?	C,T:7,6 A:100	CDS	+	173/1488	58/495	missense_variant c.173A>C p.Gln58Pro	MSMEG_RS23740		DNA-3-methyladenine glycosylase 2 family protein
NC_008596	5060922	snp	C	A	#NAME?	A:11 C:89	CDS	-	1152/1227	384/408	synonymous_variant c.1152G>T p.Ala384Ala	MSMEG_RS23925		FAD-dependent oxidoreductase
NC_008596	5074462	snp	C	A	#NAME?	A:12 C:89	CDS	-	820/936	274/311	stop_gained c.820G>T p.Glu274*	MSMEG_RS24005	cysD	sulfate adenylyltransferase subunit CysD
NC_008596	5198628	snp,snp	T	A,G	#NAME?	A,G:17,22 T:84
NC_008596	5216011	snp	C	G	#NAME?	G:7 C:58	CDS	-	625/954	209/317	missense_variant c.625G>C p.Asp209His	MSMEG_RS24675		proline dehydrogenase family protein
NC_008596	5216034	snp	T	G	#NAME?	G:9 T:75	CDS	-	602/954	201/317	missense_variant c.602A>C p.Glu201Ala	MSMEG_RS24675		proline dehydrogenase family protein
NC_008596	5246854	snp	A	C	#NAME?	C:17 A:100	CDS	-	412/1428	138/475	missense_variant c.412T>G p.Trp138Gly	MSMEG_RS24795		beta-glucosidase
NC_008596	5246858	snp	A	C	#NAME?	C:13 A:107	CDS	-	408/1428	136/475	synonymous_variant c.408T>G p.Gly136Gly	MSMEG_RS24795		beta-glucosidase
NC_008596	5318252	snp	G	C	#NAME?	C:9 G:75	CDS	+	744/1176	248/391	synonymous_variant c.744G>C p.Arg248Arg	MSMEG_RS25180		hypothetical protein
NC_008596	5324625	snp	A	T	#NAME?	T:8 A:70	CDS	+	74/1080	25/359	missense_variant c.74A>T p.Gln25Leu	MSMEG_RS25225		NAD(P)-dependent oxidoreductase
NC_008596	5385064	snp	T	G	#NAME?	G:15 T:80	CDS	-	95/261	32/86	missense_variant c.95A>C p.Glu32Ala	MSMEG_RS25515		hypothetical protein
NC_008596	5437949	snp	G	C	#NAME?	C:10 G:38
NC_008596	5437953	snp	T	A	#NAME?	A:7 T:32
NC_008596	5515240	snp	G	C	#NAME?	C:12 G:98	CDS	+	423/576	141/191	synonymous_variant c.423G>C p.Pro141Pro	MSMEG_RS26170		aminoacyl-tRNA hydrolase
NC_008596	5528165	snp	G	T	#NAME?	T:10 G:87	CDS	+	756/1194	252/397	synonymous_variant c.756G>T p.Leu252Leu	MSMEG_RS26225		FAD-dependent oxidoreductase
NC_008596	5538586	snp	A	T	#NAME?	T:14 A:87	CDS	+	392/972	131/323	missense_variant c.392A>T p.Gln131Leu	MSMEG_RS26280		linear amide C-N hydrolase
NC_008596	5538608	snp	C	G	#NAME?	G:14 C:100	CDS	+	414/972	138/323	synonymous_variant c.414C>G p.Arg138Arg	MSMEG_RS26280		linear amide C-N hydrolase
NC_008596	5558784	complex,snp	GGGC	CGGG,CGGC	#NAME?	CGGG,CGGC:9,10 GGGC:85
NC_008596	5558794	snp	C	G	#NAME?	G:17 C:85
NC_008596	5567643	snp	G	T	#NAME?	T:14 G:76	CDS	-	199/1335	67/444	missense_variant c.199C>A p.Arg67Ser	MSMEG_RS26430		trypsin-like peptidase domain-containing protein
NC_008596	5567646	snp	A	T	#NAME?	T:11 A:73	CDS	-	196/1335	66/444	missense_variant c.196T>A p.Tyr66Asn	MSMEG_RS26430		trypsin-like peptidase domain-containing protein
NC_008596	5568174	snp	A	C	#NAME?	C:11 A:93	CDS	-	1320/1479	440/492	synonymous_variant c.1320T>G p.Gly440Gly	MSMEG_RS26435		HAMP domain-containing histidine kinase
NC_008596	5635548	snp	T	G	#NAME?	G:10 T:84	CDS	+	412/1761	138/586	missense_variant c.412T>G p.Cys138Gly	MSMEG_RS26725		FUSC family protein
NC_008596	5669500	snp	G	T	#NAME?	T:12 G:0	CDS	+	501/957	167/318	synonymous_variant c.501G>T p.Leu167Leu	MSMEG_RS26895		Ku protein
NC_008596	5693399	complex	TGT	AGC	#NAME?	AGC:16 TGT:0
NC_008596	5693432	complex	G	CGGC	#NAME?	CGGC:13 G:0
NC_008596	5736203	snp,snp	T	A,G	#NAME?	A,G:9,9 T:78
NC_008596	5755584	snp,snp	A	C,T	#NAME?	C,T:6,6 A:81	CDS	+	134/711	45/236	missense_variant c.134A>C p.Glu45Ala	MSMEG_RS27290	prrA	two-component system response regulator PrrA
NC_008596	5755595	snp	A	C	#NAME?	C:12 A:51	CDS	+	145/711	49/236	missense_variant c.145A>C p.Ser49Arg	MSMEG_RS27290	prrA	two-component system response regulator PrrA
NC_008596	5803123	snp	A	C	#NAME?	C:6 A:35
NC_008596	5803135	snp	G	T	#NAME?	T:7 G:32
NC_008596	5807183	snp	A	C	#NAME?	C:13 A:81	CDS	-	378/432	126/143	synonymous_variant c.378T>G p.Gly126Gly	MSMEG_RS27590		hypothetical protein
NC_008596	5864303	snp	A	C	#NAME?	C:11 A:72	CDS	+	641/1080	214/359	missense_variant c.641A>C p.Gln214Pro	MSMEG_RS27935		folate-binding protein YgfZ
NC_008596	5884227	snp,snp	C	A,T	#NAME?	A,T:6,7 C:106	CDS	+	405/1215	135/404	synonymous_variant c.405C>A p.Pro135Pro	MSMEG_RS28035		MCE family protein
NC_008596	5914026	snp	C	A	#NAME?	A:9 C:78	CDS	+	391/1704	131/567	missense_variant c.391C>A p.Pro131Thr	MSMEG_RS28185		bifunctional ribonuclease/(p)ppGpp synthase
NC_008596	5953980	snp,snp	T	A,G	#NAME?	A,G:14,6 T:72	CDS	-	115/633	39/210	missense_variant c.115A>T p.Arg39Trp	MSMEG_RS28410		hypothetical protein
NC_008596	5953991	snp	A	C	#NAME?	C:10 A:79	CDS	-	104/633	35/210	missense_variant c.104T>G p.Val35Gly	MSMEG_RS28410		hypothetical protein
NC_008596	5954017	snp,snp	A	C,T	#NAME?	C,T:6,6 A:62	CDS	-	78/633	26/210	synonymous_variant c.78T>G p.Pro26Pro	MSMEG_RS28410		hypothetical protein
NC_008596	5954026	snp	T	G	#NAME?	G:13 T:53	CDS	-	69/633	23/210	synonymous_variant c.69A>C p.Ala23Ala	MSMEG_RS28410		hypothetical protein
NC_008596	5954028	snp	C	G	#NAME?	G:9 C:51	CDS	-	67/633	23/210	missense_variant c.67G>C p.Ala23Pro	MSMEG_RS28410		hypothetical protein
NC_008596	5982633	snp,snp	T	A,G	#NAME?	A,G:6,10 T:86	CDS	+	778/1074	260/357	missense_variant c.778T>A p.Ser260Thr	MSMEG_RS28545		thiolase domain-containing protein
NC_008596	6051888	snp	A	T	#NAME?	T:10 A:77	CDS	-	702/1788	234/595	synonymous_variant c.702T>A p.Pro234Pro	MSMEG_RS28855	glmS	glutamine--fructose-6-phosphate transaminase (isomerizing)
NC_008596	6072308	snp	G	T	#NAME?	T:14 G:60
NC_008596	6072318	snp	A	T	#NAME?	T:12 A:57
NC_008596	6130417	snp	C	A	#NAME?	A:13 C:85	CDS	-	138/792	46/263	synonymous_variant c.138G>T p.Gly46Gly	MSMEG_RS29235		ABC transporter ATP-binding protein
NC_008596	6130427	snp	T	G	#NAME?	G:10 T:73	CDS	-	128/792	43/263	missense_variant c.128A>C p.Asn43Thr	MSMEG_RS29235		ABC transporter ATP-binding protein
NC_008596	6130429	snp	C	A	#NAME?	A:15 C:65	CDS	-	126/792	42/263	synonymous_variant c.126G>T p.Pro42Pro	MSMEG_RS29235		ABC transporter ATP-binding protein
NC_008596	6135864	snp	A	C	#NAME?	C:8 A:57	CDS	+	604/945	202/314	missense_variant c.604A>C p.Ser202Arg	MSMEG_RS29280		MBL fold metallo-hydrolase
NC_008596	6135898	snp	A	C	#NAME?	C:10 A:42	CDS	+	638/945	213/314	missense_variant c.638A>C p.Gln213Pro	MSMEG_RS29280		MBL fold metallo-hydrolase
NC_008596	6146674	snp,snp	A	C,G	#NAME?	C,G:6,7 A:104	CDS	+	201/882	67/293	synonymous_variant c.201A>C p.Gly67Gly	MSMEG_RS29340		A/G-specific adenine glycosylase MutY
NC_008596	6154267	snp,snp	A	C,T	#NAME?	C,T:7,7 A:90	CDS	-	1251/2547	417/848	synonymous_variant c.1251T>G p.Ala417Ala	MSMEG_RS29385	clpC1	ATP-dependent protease ATP-binding subunit ClpC
NC_008596	6162249	snp	C	G	#NAME?	G:18 C:47	CDS	-	1263/1620	421/539	synonymous_variant c.1263G>C p.Pro421Pro	MSMEG_RS29420		hypothetical protein
NC_008596	6162254	snp	T	G	#NAME?	G:12 T:57	CDS	-	1258/1620	420/539	missense_variant c.1258A>C p.Thr420Pro	MSMEG_RS29420		hypothetical protein
NC_008596	6162642	snp	T	G	#NAME?	G:11 T:76	CDS	-	870/1620	290/539	synonymous_variant c.870A>C p.Pro290Pro	MSMEG_RS29420		hypothetical protein
NC_008596	6250521	snp	C	A	#NAME?	A:9 C:72
NC_008596	6306182	snp	T	G	#NAME?	G:8 T:55	CDS	-	265/1494	89/497	missense_variant c.265A>C p.Ser89Arg	MSMEG_RS30100		VWA domain-containing protein
NC_008596	6336512	snp	C	G	#NAME?	G:14 C:30
NC_008596	6352395	snp	A	C	#NAME?	C:12 A:100	CDS	-	379/1287	127/428	missense_variant c.379T>G p.Ser127Ala	MSMEG_RS30320		aminotransferase class I/II-fold pyridoxal phosphate-dependent enzyme
NC_008596	6355764	snp	T	G	#NAME?	G:12 T:75	CDS	+	623/1512	208/503	missense_variant c.623T>G p.Val208Gly	MSMEG_RS30345		DNA-binding protein
NC_008596	6363361	snp	T	G	#NAME?	G:11 T:76	CDS	+	226/1536	76/511	missense_variant c.226T>G p.Phe76Val	MSMEG_RS30380		aldehyde dehydrogenase
NC_008596	6365110	snp	A	C	#NAME?	C:16 A:104	CDS	+	440/897	147/298	missense_variant c.440A>C p.Asn147Thr	MSMEG_RS30385		CoA ester lyase
NC_008596	6426453	snp	T	A	#NAME?	A:10 T:82	CDS	+	1169/1410	390/469	missense_variant c.1169T>A p.Leu390Gln	MSMEG_RS30730		PLP-dependent aminotransferase family protein
NC_008596	6426616	snp,snp	C	A,G	#NAME?	A,G:12,6 C:76	CDS	+	1332/1410	444/469	missense_variant c.1332C>A p.Phe444Leu	MSMEG_RS30730		PLP-dependent aminotransferase family protein
NC_008596	6458610	snp	A	C	#NAME?	C:20 A:63	CDS	-	3656/5526	1219/1841	missense_variant c.3656T>G p.Val1219Gly	MSMEG_RS30835		acyltransferase domain-containing protein
NC_008596	6458640	snp	A	C	#NAME?	C:16 A:95	CDS	-	3626/5526	1209/1841	missense_variant c.3626T>G p.Val1209Gly	MSMEG_RS30835		acyltransferase domain-containing protein
NC_008596	6467047	complex	TCGA	CTGACG	#NAME?	CTGACG:17 TCGA:0
NC_008596	6501295	snp	T	G	#NAME?	G:17 T:78
NC_008596	6551778	snp	G	T	#NAME?	T:12 G:104	CDS	-	903/1344	301/447	missense_variant c.903C>A p.Phe301Leu	MSMEG_RS31305		MFS transporter
NC_008596	6581049	snp	T	G	#NAME?	G:11 T:95	CDS	+	473/801	158/266	missense_variant c.473T>G p.Val158Gly	MSMEG_RS31440		DUF2470 domain-containing protein
NC_008596	6595395	snp	C	A	#NAME?	A:12 C:97	CDS	+	496/576	166/191	missense_variant c.496C>A p.Pro166Thr	MSMEG_RS31525		TetR/AcrR family transcriptional regulator
NC_008596	6687505	ins	C	CCG	#NAME?	CCG:18 C:0
NC_008596	6689683	snp	A	T	#NAME?	T:11 A:94	CDS	-	151/2283	51/760	missense_variant c.151T>A p.Trp51Arg	MSMEG_RS32010	metE	5-methyltetrahydropteroyltriglutamate-- homocysteine S-methyltransferase
NC_008596	6773693	snp,snp	A	C,T	#NAME?	C,T:6,6 A:106	CDS	-	197/630	66/209	missense_variant c.197T>G p.Leu66Arg	MSMEG_RS32415		ABC transporter permease
NC_008596	6799078	snp	G	T	#NAME?	T:15 G:96	CDS	+	646/1029	216/342	stop_gained c.646G>T p.Glu216*	MSMEG_RS32555		(R)-hydratase
NC_008596	6825430	snp,snp	G	C,T	#NAME?	C,T:7,7 G:102	CDS	+	1339/1356	447/451	stop_gained c.1339G>T p.Glu447*	MSMEG_RS32660		MHS family MFS transporter
NC_008596	6870177	snp	A	C	#NAME?	C:15 A:125	CDS	+	415/953	139/316	missense_variant c.415A>C p.Thr139Pro	MSMEG_RS32875		phosphofructokinase
NC_008596	6923327	complex,snp,snp	CGGT	GGGG,GGGT,CGGG	#NAME?	GGGG,GGGT,CGGG:12,12,8 CGGT:68	CDS	-	730/1503	244/500	missense_variant c.730G>C p.Ala244Pro	MSMEG_RS33145		aldehyde dehydrogenase
NC_008596	6963096	snp	C	G	#NAME?	G:12 C:72
NC_008596	6963100	snp	C	G	#NAME?	G:12 C:50
NC_008596	6963101	snp	C	G	#NAME?	G:13 C:49
NC_008596	6963102	snp	G	C	#NAME?	C:8 G:54
NC_008596	6963116	snp	C	G	#NAME?	G:8 C:45
NC_008596	6971533	snp	T	G	#NAME?	G:11 T:91	CDS	+	2138/2403	713/800	missense_variant c.2138T>G p.Leu713Arg	MSMEG_RS33380		hypothetical protein
NC_008596	6971539	snp	T	A	#NAME?	A:13 T:83	CDS	+	2144/2403	715/800	missense_variant c.2144T>A p.Leu715His	MSMEG_RS33380		hypothetical protein
